# Supplementary material
Source: PubMed Central journal article supplement (PMC9202523)
Supplement: NIHMS1809560-supplement-1.pdf [file NIHMS1809560-supplement-1.pdf]

1620 **Supplementary Information**

1621

1622 Supplementary information includes 7 supplementary figures and 4 supplementary tables.

1623

1624 **Supplementary Figure 1. Related to Figure 1. (A)** Immunoblots of *Lrpprc* and Hsp90 in  
1625 various tissues from ~8-week-old male CON and *Lrpprc*<sup>BKO</sup> mice at RT. **(B)** Q-PCR  
1626 analysis of mRNA levels of *Lrpprc* in BAT, iWAT and eWAT from ~8-week-old CON and  
1627 *Lrpprc*<sup>BKO</sup> mice at RT. **(C)** Q-PCR analysis of relative mRNA levels of *Lrpprc*, *Ucp1*, *Pgc1α*,  
1628 *Cidea*, *Cox8b*, *Dio2* and *Pgc1α* in BAT from ~8-week-old male CON and *Lrpprc*<sup>BKO</sup> mice  
1629 at RT. Sample size: CON (n=4) and *Lrpprc*<sup>BKO</sup> (n=4). **(D)** Left: Immunoblots of phosphor-  
1630 PKA substrates, *Lrpprc*, *Ucp1* and Hsp90 in BAT from ~8-week-old CON and *Lrpprc*<sup>BKO</sup>  
1631 mice at RT. Right: Relative abundance (to Hsp90) shown. Significance between  
1632 genotypes indicated. **(E)** Relative mtDNA copy numbers in BAT from ~8-week-old CON  
1633 and *Lrpprc*<sup>BKO</sup> mice at RT. Sample size: CON (n=5) and *Lrpprc*<sup>BKO</sup> (n=5). **(F)**  
1634 Representative H&E staining of BAT from ~8-12-week of male CON (*Lrpprc*<sup>ff/ff</sup>) and  
1635 *Lrpprc*<sup>BKO</sup> (*Ucp1-Cre;Lrpprc*<sup>ff/ff</sup>) mice housed at room temperature (RT) and  
1636 thermoneutrality (30°C). Scale bar: 50μm. **(G)** Frequency of mitochondrial and non-  
1637 mitochondrial proteins identified by mass spectrometry from isolated mitochondria of ~8-  
1638 10-week-old male CON and *Lrpprc*<sup>BKO</sup> mice housed at RT and 30°C. Sample size: n=3  
1639 for each condition (CON/RT, CON/30°C, *Lrpprc*<sup>BKO</sup>/RT and *Lrpprc*<sup>BKO</sup>/30°C). **(H)** Volcano  
1640 plots showing significantly (p<0.1) down- or up-regulated mitochondrial proteins (over 1.5-  
1641 fold) in *Lrpprc*<sup>BKO</sup> mice at RT and 30°C. **(I)** Principal component analysis of mitochondrial  
1642 proteome in the four genotype/conditions. **(J)** Heatmap of Log2 FC values of the complex  
1643 IV protein abundances measured by mass spectrometry in BAT mitochondria from CON  
1644 and *Lrpprc*<sup>BKO</sup> mice housed at RT and 30°C. mt-unit: mitochondrion-encoded subunit, n-  
1645 unit: nucleus-encoded subunit, n-af: nucleus-encoded assembly factor. **(K)** Gene  
1646 Ontology (GO) analysis showing enriched cellular components and molecular functions  
1647 in mitochondrial proteome. **(L)** Clustering analysis of mitochondrial proteome using fold  
1648 changes of BAT mitochondrial protein abundance from ~8-12-week-old male *Lkb1*<sup>BKO</sup>,  
1649 *Tfam*<sup>BKO</sup> and *Lrpprc*<sup>BKO</sup> (to their relative controls) on normal chow at both RT and 30°C.  
1650 **(M)** Lists of proteins that are both upregulated or downregulated in the BAT from *Tfam*<sup>BKO</sup>  
1651 and *Lrpprc*<sup>BKO</sup> mice. **(N)** Recordings of respiratory exchange ratio (RER) in ~8-12-week-  
1652 old male CON and *Lrpprc*<sup>BKO</sup> mice at RT and 30°C. Red arrowhead: time of CL injection.  
1653 Average night and day EE **(O)**, RER **(P)** and physical activity **(Q)** in the aforementioned  
1654 mice. Average night and day food intake **(R)**, 3-day cumulative food intake curve **(S)** and

1655 total cumulative food intake (**T**) in the aforementioned mice. Sample size: CON/RT (n=6),  
1656 Lrp<sup>prc</sup><sup>BKO</sup>/RT (n=6), CON/30°C (n=6) and Lrp<sup>prc</sup><sup>BKO</sup>/30°C (n=5). Data were presented as  
1657 average ± SEM. Unpaired t-test. \*: p<0.05 and \*\*: p<0.01.

1658

1659

1660 **Supplementary Figure 2. Related to Figure 1. (A)** The mRNA levels of thermogenic  
1661 genes (*Ucp1*, *Cidea* and *Cox8b*) in iWAT from ~8-week- and ~8-month-old male CON  
1662 and *Lrpprc*<sup>BKO</sup> mice at normal chow at RT. Sample size: CON/8w (n=8), *Lrpprc*<sup>BKO</sup>/8w  
1663 (n=8), CON/8m (n=6), and *Lrpprc*<sup>BKO</sup>/8m (n=6). **(B)** Left: Immunoblots showing phospho-  
1664 PKA substates, *Ucp1* and *Hsp90* levels in ~8-week-old male CON and *Lrpprc*<sup>BKO</sup> mice at  
1665 RT. Right: Relative *Ucp1* protein abundance (to *Hsp90*) shown. Significance between  
1666 genotypes indicated. **(C)** Representative H&E staining of iWAT from male CON and  
1667 *Lrpprc*<sup>BKO</sup> mice at ~8-week- and ~8-month of age. Red arrows: multilocular beige  
1668 adipocytes. Scale bar: 100 $\mu$ m. **(D)** The mRNA levels of thermogenic genes (*Ucp1*, *Cidea*  
1669 and *Cox8b*) in iWAT from ~10-week-old male CON and *Lrpprc*<sup>BKO</sup> mice at normal chow  
1670 at 30°C. Sample size: CON/30°C (n=7) and *Lrpprc*<sup>BKO</sup>/30°C (n=6). **(E)** Representative  
1671 H&E staining of iWAT from male CON and *Lrpprc*<sup>BKO</sup> mice at ~10-week of age at 30°C.  
1672 Scale bar: 100 $\mu$ m. **(F)** Q-PCR analysis of *Ucp1*, *Ryr2* and *Atp2a2* (calcium cycle), *Slc6a8*,  
1673 *Ckmt1*, *Ckmt3*, *Gatm* and *Gatmt* (Creatine cycle) in the iWAT of ~8-week-old male CON  
1674 and *Lrpprc*<sup>BKO</sup> mice at RT. Sample size: CON (n=6) and *Lrpprc*<sup>BKO</sup> (n=6). **(G)**  
1675 Representative H&E staining of eWAT from male CON and *Lrpprc*<sup>BKO</sup> mice at ~8-week of  
1676 age at RT. Scale bar: 50 $\mu$ m. **(H)** Q-PCR analysis of *Ucp1*, *Ryr2* and *Atp2a2* (calcium  
1677 cycle), *Slc6a8*, *Ckmt1*, *Ckmt3*, *Gatm* and *Gatmt* (Creatine cycle) in the eWAT of ~8-week-  
1678 old male CON and *Lrpprc*<sup>BKO</sup> mice at RT. Sample size: CON (n=4) and *Lrpprc*<sup>BKO</sup> (n=4).  
1679 **(I)** Diagram of experimental design for beige adipocyte ablation. All mice were injected  
1680 with diphtheria toxin (DT) at 3-week of age. Genotypes of CON, *Lrpprc*<sup>BKO</sup> and  
1681 *Lrpprc*<sup>BKO</sup>;iDTR mice shown. Q-PCR analysis of *Ucp1* in the iWAT **(J)** and *Lrpprc* and *mt-*  
1682 *Co1* in the BAT **(K)** from ~8-10-week-old male and female CON, *Lrpprc*<sup>BKO</sup> and  
1683 *Lrpprc*<sup>BKO</sup>;iDTR mice. **(L)** CTT of ~8-10-week-old male and female CON, *Lrpprc*<sup>BKO</sup> and  
1684 *Lrpprc*<sup>BKO</sup>;iDTR mice. Sample size: CON (n=4), *Lrpprc*<sup>BKO</sup> (n=3) and *Lrpprc*<sup>BKO</sup>;iDTR  
1685 (n=3). **(M)** Two areas of interest were selected for temperature measurement by Infrared  
1686 (IR) thermal imaging; one was the neck (overlying the BAT) and other one was the back  
1687 (not overlying the BAT). **(N)** Experimental design. IR imaging of mice before and after  
1688 they were transferred from thermoneutrality to RT for 15 minutes. **(O)** Representative IR  
1689 images of control mice before and after transferring from 30°C to RT under feeding  
1690 condition. White circle: area of interest. **(P)** Before-after plot of core body temperature

1691 (measured by probe), neck and back temperatures (measured by IR) of ~10-week-old  
1692 male wild-type mice at either feeding (with or without Propranolol injection) or after 4-hour  
1693 fasting. **(Q)** Calculation of Temp (Neck-Back), the difference between neck and back  
1694 surface temperatures by IR under aforementioned conditions. Sample size: n=4. **(R)**  
1695 Temp (Neck-Back) of ~10-week-old wild-type mice 15 minutes after 1 mg kg<sup>-1</sup> CL (or  
1696 vehicle PBS) injection under feeding or after 4-hour fasting at thermoneutrality. Sample  
1697 size: n=7 at feeding and n=5 after fasting. **(S)** Temp (Neck-Back) of ~10-week-old male  
1698 and female CON and Lrprrc<sup>BKO</sup> mice before and after 15-minute RT stimulation from  
1699 thermoneutrality under feeding condition. **(T)** Temp (Neck-Back) of ~10-week-old male  
1700 and female CON and Lrprrc<sup>BKO</sup> mice after 4-hour fasting at thermoneutrality. Sample size:  
1701 CON (n=6) and Lrprrc<sup>BKO</sup> (n=9). **(U)** Temp (Neck-Back) of ~8-week-old male and female  
1702 CON and Lrprrc<sup>BKO</sup> mice housed at RT. Sample size: CON (n=7) and Lrprrc<sup>BKO</sup> (n=11).  
1703 **(V)** Left: Representative sagittal views of fused PET and CT, and PET-only showing <sup>18</sup>F-  
1704 FDG uptake in BAT from CON and Lrprrc<sup>BKO</sup> mice. Color map showed at the bottom.  
1705 Right: Average BAT <sup>18</sup>F-FDG uptake in CON and Lrprrc<sup>BKO</sup> mice. Sample size: CON (n=9)  
1706 and Lrprrc<sup>BKO</sup> (n=8). **(W)** The rate of serum glycerol increases in response to 1mg kg<sup>-1</sup>  
1707 CL316,423 injection (indicator of *in vivo* lipolytic activity) in ~8-12-week-old male CON  
1708 and Lrprrc<sup>BKO</sup> mice under normal chow at RT. Sample size: CON (n=5) and Lrprrc<sup>BKO</sup>  
1709 (n=5). **(X)** The rate of glycerol release in the media in response to 10mM Forskolin  
1710 (indicator of *ex vivo* lipolytic activity) from BAT tissue of ~8-12-week-old male CON and  
1711 Lrprrc<sup>BKO</sup> mice under normal chow at RT and 30°C. **(Y)** Left: Immunoblots showing  
1712 amounts of Hsl, Atgl and Hsp90 in the BAT of ~8-12-week-old male CON and Lrprrc<sup>BKO</sup>  
1713 mice under normal chow at both RT and 30°C. Right: Relative abundance (to Hsp90)  
1714 shown. **(Z)** Serum triglyceride levels in ~12-week-old male and female wild-type mice 2  
1715 hours after DMSO or 25 mg kg<sup>-1</sup> Orlistat injection at thermoneutrality. Sample size: DMSO  
1716 (n=6) and Orlistat (n=6). **(AA)** Blood glucose levels in ~12-week-old male and female  
1717 wild-type mice 2 hours after DMSO or 10 mg kg<sup>-1</sup> Sotagliflozin injection at thermoneutrality.  
1718 Sample size: DMSO (n=8) and Sotagliflozin (n=8). Data were presented as average ±  
1719 SEM. Unpaired t-test. \*: p<0.05 and \*\*: p<0.01.

**Supplementary Figure 3. Related to Figure 2.** (A) Heatmap showing cluster analysis of DEGs in the BAT of male CON and *Lrrprc*<sup>BKO</sup> mice at RT and 30°C. (B) Volcano plots showing significantly ( $p < 0.05$ ) down- or up-regulated genes in the BAT of *Lrrprc*<sup>BKO</sup> mice at RT and 30°C. (C) Venn diagram showing down-regulated DEGs in the BAT of *Lrrprc*<sup>BKO</sup> mice at RT and 30°C. (D) GO analysis of shared down-regulated DEGs. (E) KEGG mmu00190 Oxidative phosphorylation pathway. Down-regulated genes were highlighted in blue. The mtDNA-encoded ETC subunits were labeled by a red asterisk. (F) Venn diagram showing up-regulated DEGs in the BAT of *Lrrprc*<sup>BKO</sup> mice at RT and thermoneutrality. (G) GO analysis of shared up-regulated DEGs. (H) Left: Immunoblots showing amounts of p-eIF2 $\alpha$ , total eIF2 $\alpha$ , and Hsp90 in the BAT of ~8-12-week-old male *Tfam*<sup>BKO</sup> mice compared with their relative controls at normal chow at both RT and 30°C. Right: Relative phosphorylation (to total protein) shown. Significance between genotypes indicated. (I) Immunoblots showing amounts of p-eIF2 $\alpha$ , total eIF2 $\alpha$ , and Hsp90 in the BAT of ~8-12-week-old male *Lrrprc*<sup>BKO</sup> and betaless mice compared with their relative controls at normal chow at both RT and 30°C. (J) Circulating Fgf21 levels in ~8-12-week-old male CON and *Lrrprc*<sup>BKO</sup> mice at RT and 30°C. Sample size: CON/RT (n=4), *Lrrprc*<sup>BKO</sup>/RT (n=6), CON/30°C (n=5) and *Lrrprc*<sup>BKO</sup>/30°C (n=5). (K) Representative H&E staining of BAT from ~8-12-week of male CON and *Atf4*<sup>BKO</sup> mice housed at RT and 30°C. Scale bar: 50 $\mu$ m. (L) Heatmap showing log<sub>2</sub> fold changes of mtDNA- and nuclear-encoded ETC genes, known ATF4 target genes in the BAT of CON and *Atf4*<sup>BKO</sup> mice housed at RT and 30°C. Hourly CL-induced VO<sub>2</sub> (M) and EE (N) in ~8-12-week old male CON and *ATF4*<sup>BOX</sup> mice at RT and 30°C. Average night and day EE (O), RER (P) and physical activity (Q) in the aforementioned mice. Average night and day food intake (R), 3-day cumulative food intake curve (S) and total cumulative food intake (T) in the aforementioned mice. Sample size: CON/RT (n=4), *Atf4*<sup>BKO</sup>/RT (n=3), CON/30°C (n=6) and *Atf4*<sup>BKO</sup>/30°C (n=6). Average night and day EE (U), RER (V) and physical activity (W) in ~10-week old male CON, *Lrrprc*<sup>BKO</sup> and *Lrrprc*;*Atf4*<sup>BKO</sup> mice at RT and 30°C. Average night and day food intake (X), 3-day cumulative food intake curve (Y) and total cumulative food intake (Z) in the aforementioned mice. Sample size: CON/RT(n=8), *Lrrprc*<sup>BKO</sup>/RT (n=3), *Lrrprc*;*Atf4*<sup>BKO</sup>/RT(n=6), CON/30°C(n=11), *Lrrprc*<sup>BKO</sup>/30°C (n=6) and

1751 Lrpprc;Atf4<sup>BKO</sup>/30°C (n=6). Data were presented as average ± SEM. Unpaired t-test. n.s.:  
1752 not significant, \*: p<0.05, and \*\*: p<0.01.

1753

**Supplementary Figure 4. Related to Figure 3.** Average night and day EE (**A**) and hourly CL-induced EE (**B**) and CL-induced VO<sub>2</sub> (**C**) in ~8-10-week-old male CON and ATF4<sup>BOX</sup> mice at RT and 30°C. Average night and day RER (**D**) and physical activity (**E**) in ~8-10-week-old male CON and ATF4<sup>BOX</sup> mice for three days at RT and 30°C. Average night and day food intake (**F**), 3-day cumulative food intake curve (**G**) and total cumulative food intake (**H**) in above mice. Sample size: CON/RT (n=10), ATF4<sup>BOX</sup>/RT (n=4), CON/30°C (n=10) and ATF4<sup>BOX</sup>/30°C (n=5). Average night and day EE (**I**) and physical activity (**J**) in ~8-10-week-old male Ucp1 KO and ATF4<sup>BOX</sup>;Ucp1 KO mice at RT. Sample size: Ucp1 KO/RT (n=5) and ATF4<sup>BOX</sup>;Ucp1 KO/RT (n=4). Average night and day food intake (**K**), 3-day cumulative food intake curve (**L**) and total cumulative food intake (**M**) in ~8-10-week-old male Ucp1 KO and ATF4<sup>BOX</sup>;Ucp1 KO mice at RT. Sample size: Ucp1 KO/RT (n=5) and ATF4<sup>BOX</sup>;Ucp1 KO/RT (n=3). Average night and day EE (**N**) and physical activity (**O**) in ~12-week-old female Ucp1 KO and ATF4<sup>BOX</sup>;Ucp1 KO mice at 30°C. Sample size: Ucp1 KO/30°C (n=5) and ATF4<sup>BOX</sup>;Ucp1 KO/30°C (n=5). Average night and day food intake (**P**), 3-day cumulative food intake curve (**Q**) and total cumulative food intake (**R**) in ~12-week-old female Ucp1 KO and ATF4<sup>BOX</sup>;Ucp1 KO mice at 30°C. Sample size: Ucp1 KO/30°C (n=4) and ATF4<sup>BOX</sup>;Ucp1 KO/30°C (n=5). Data were presented as average ± SEM.



1773 **Supplementary Figure 5. Related to Figure 4. (A)** Q-PCR analysis of *Slc3a2* mRNA  
1774 levels in the BAT of ~10-week-old male CON and *Lrrprc*<sup>BKO</sup> mice housed at RT and 30°C.  
1775 Sample size: n=5 for each genotype/condition. **(B)** Left: Immunoblots of *Slc3a2* and Actin  
1776 in the BAT of ~10-week-old male CON and *Lrrprc*<sup>BKO</sup> mice at *ad libitum* feeding at RT  
1777 and 30°C. Right: Relative abundance (to Actin) shown. Significance between genotypes  
1778 indicated. **(C)** Heatmap showing log<sub>2</sub> fold changes of mRNA levels of *Slc3a2*, *Slc7a1*,  
1779 *Slc7a11* and *Slc38a2* in the BAT of *Lrrprc*<sup>BKO</sup>, *Tfam*<sup>BKO</sup>, *ATF4*<sup>BOX</sup> and *ATF4*<sup>BOX</sup>;*Ucp1*KO  
1780 mice. Sample size: n=5 for each genotype/condition. Left: Immunoblots of *Slc3a2* and  
1781 Actin proteins in the BAT of *Tfam*<sup>BKO</sup> **(D)**, *ATF4*<sup>BOX</sup> **(F)** and *ATF4*<sup>BOX</sup>;*Ucp1*KO **(F)** mice and  
1782 their relative controls at different ambient temperatures. Right: Relative abundance (to  
1783 Actin) shown. Significance between genotypes indicated. **(G)** Top: Representative  
1784 sagittal views of fused PET and CT, and PET-only showing <sup>18</sup>F-Fluciclovine uptake in  
1785 BAT from 12-week-old male CON and *Lrrprc*<sup>BKO</sup> mice. Color map showed at the right.  
1786 Bottom: Uptake curves in BAT from CON and *Lrrprc*<sup>BKO</sup> mice over time. Sample size:  
1787 CON (n=9) and *Lrrprc*<sup>BKO</sup> (n=8). **(H)** Average values of <sup>18</sup>F-Fluciclovine uptake in ~10-  
1788 12-week-old male CON and *Lrrprc*;*Atf4*<sup>BKO</sup> mice. Sample size: CON (n=5) and  
1789 *Lrrprc*;*Atf4*<sup>BKO</sup> (n=4). **(I)** Left: Immunoblots of p-eIF2 $\alpha$ , total eIF2 $\alpha$ , p-S6, total S6, p-  
1790 4Ebp1, total 4Ebp1, puromycylated protein, ubiquitinated protein and Hsp90 in the BAT  
1791 of ~10-week-old male CON and *Lrrprc*<sup>BKO</sup> mice at *ad libitum* feeding at RT and 30°C.  
1792 Right: Relative abundance (to Hsp90) or phosphorylation (to total protein) shown.  
1793 Significance between genotypes indicated. **(J)** Left: Immunoblots of *Lrrprc*, p-eIF2 $\alpha$ , total  
1794 eIF2 $\alpha$ , *Slc3a2*, p-S6, total S6, p-4Ebp1, total 4Ebp1, puromycylated protein, ubiquitinated  
1795 protein and Hsp90 in the BAT of ~10-week-old male CON, *Lrrprc*<sup>BKO</sup> and *Lrrprc*;*Atf4*<sup>BKO</sup>  
1796 mice at *ad libitum* feeding at RT. Right: Relative abundance (to Hsp90) or phosphorylation  
1797 (to total protein) shown. Significance between genotypes indicated. **(K)** Left: Immunoblots  
1798 of *Lrrprc*, p-eIF2 $\alpha$ , total eIF2 $\alpha$ , *Slc3a2*, p-S6, total S6, p-4Ebp1, total 4Ebp1,  
1799 puromycylated protein, ubiquitinated protein and Hsp90 in the BAT of ~10-week-old male  
1800 CON, *Lrrprc*<sup>BKO</sup> and *Lrrprc*;*Atf4*<sup>BKO</sup> mice at *ad libitum* feeding at 30°C. Right: Relative  
1801 abundance (to Hsp90) or phosphorylation (to total protein) shown. Significance between  
1802 genotypes indicated. **(L)** Left: Immunoblots of p-S6, total S6, p-4Ebp1, total 4Ebp1,  
1803 puromycylated protein, ubiquitinated protein and Hsp90 in the BAT of ~10-week-old male

1804 Tfam<sup>BKO</sup> mice at *ad libitum* feeding at RT and 30°C. Right: Relative abundance (to Hsp90)  
1805 or phosphorylation (to total protein) shown. Significance between genotypes indicated.  
1806 **(M)** Left: Immunoblots of Ucp1, p-S6, total S6, p-4Ebp1, total 4Ebp1, puromycylated  
1807 protein, ubiquitinated protein and Hsp90 in the BAT of ~10-week-old male CON, ATF4<sup>BOX</sup>,  
1808 Ucp1 KO, ATF4<sup>BOX</sup>;Ucp1 KO mice at *ad libitum* feeding at RT. Right: Relative abundance  
1809 (to Hsp90) or phosphorylation (to total protein) shown. Significance between genotypes  
1810 indicated. **(N)** Left: Immunoblots of p-S6, total S6, p-4Ebp1, total 4Ebp1, puromycylated  
1811 protein, ubiquitinated protein and Hsp90 in the BAT of ~10-week-old male CON and  
1812 Lrrprc<sup>BKO</sup> mice at *ad libitum* feeding at RT with DMSO or BCH treatment. Right: Relative  
1813 abundance (to Hsp90) or phosphorylation (to total protein) shown. Significance between  
1814 genotypes and treatment indicated. **(O)** Left: Immunoblots of p-S6, total S6, p-4Ebp1,  
1815 total 4Ebp1, puromycylated protein, ubiquitinated protein and Hsp90 in the BAT of ~10-  
1816 week-old male CON and ATF4<sup>BOX</sup> mice at *ad libitum* feeding at 30°C with DMSO or RAPA  
1817 treatment. Right: Relative abundance (to Hsp90) or phosphorylation (to total protein)  
1818 shown. Significance between genotypes and treatment indicated. **(P)** Left: Immunoblots  
1819 of p-S6, total S6, p-4Ebp1, total 4Ebp1, puromycylated protein, ubiquitinated protein and  
1820 Hsp90 in the muscle of ~10-week-old male CON and ATF4<sup>BOX</sup> mice at *ad libitum* feeding  
1821 at 30°C with DMSO or RAPA treatment. Right: Relative abundance (to Hsp90) or  
1822 phosphorylation (to total protein) shown. **(Q)** Left: Immunoblots of Lrrprc, Lc3b (I and II)  
1823 and Hsp90 in the BAT from ~8-12-week-old male CON and Lrrprc<sup>BKO</sup> mice at *ad libitum*  
1824 feeding at RT and 30°C. Right: Relative abundance (to Hsp90) or Lc3b processing (ratio  
1825 of Lc3b II and Lc3b I) shown. Significance between genotypes indicated. **(R)** Heatmap  
1826 showing log2 fold changes of mRNA levels of *Nfe2l1*, *Pσμα1*, *Pσmb1*, *Pσmd1*, *Atg5*, *Atg7*,  
1827 *Beclin*, *Lc3b* and *Ulk1* in the BAT of Lrrprc<sup>BKO</sup> and ATF4<sup>BOX</sup> mice at RT and 30°C. Sample  
1828 size: n=5 for each genotype/condition. **(S)** Core temperature drop of ~8-week-old male  
1829 and female CON and Lrrprc<sup>BKO</sup> mice after 8-hour CTT from RT. DMSO or αMT was  
1830 injected 1 hour prior to CTT. Sample size: CON/DMSO (n=5), Lrrprc<sup>BKO</sup>/DMSO (n=6),  
1831 CON/αMT (n=5) and Lrrprc<sup>BKO</sup>/αMT (n=5). **(T)** Core temperature drop of ~10-week-old  
1832 male and female Tfam<sup>BKO</sup> mice and their relative controls with pretreatment of DMSO or  
1833 RAPA or BORT or BCH after 8 hours 4°C CTT from RT. Sample size: CON/RT/DMSO  
1834 (n=4), Tfam<sup>BKO</sup>/RT/DMSO (n=4), CON/RT/RAPA (n=4), Tfam<sup>BKO</sup>/RT/RAPA (n=5),

1835 CON/RT/BORT (n=3), Tfam<sup>BKO</sup>/RT/BORT (n=6), CON/RT/BCH (n=5) and  
1836 Tfam<sup>BKO</sup>/RT/BCH (n=5). **(U)** Core temperature drop of ~8-week-old male and female  
1837 CON and Gnas<sup>BKO</sup> mice after 8-hour CTT from RT. DMSO or RAPA or BORT was injected  
1838 1 hour prior to CTT. Sample size: CON/DMSO (n=5), Gnas<sup>BKO</sup>/DMSO (n=7), CON/RAPA  
1839 (n=3), Gnas<sup>BKO</sup>/RAPA (n=6), CON/BORT (n=5) and Gnas<sup>BKO</sup>/BORT (n=5). **(V)** Lactate  
1840 concentration in the media from BAT of CON and Lrprrc<sup>BKO</sup> mice after DMSO or 20mM  
1841 BCH treatment for 24 hours. Sample size: CON (n=5) and Lrprrc<sup>BKO</sup> (n=5). **(W)** Lactate  
1842 concentration in the media from BAT of CON and Lrprrc;Atf4<sup>BKO</sup> mice. Sample size: CON  
1843 (n=6) and Lrprrc;Atf4<sup>BKO</sup> (n=5). **(X)** Lactate concentration in the media from BAT of CON  
1844 and ATF4<sup>BOX</sup> mice after DMSO or 20mM BCH treatment for 24 hours. Sample size: CON  
1845 (n=5) and ATF4<sup>BOX</sup> (n=5). Data were presented as average ± SEM. Unpaired t-test. n.s.:  
1846 non-significant; \*\*: p<0.01. **(Y)** Heatmaps showing log2 FC of ATF4 targets (top), mt ETC  
1847 (middle) and nuclear ETC (bottom) caused by ATF4 overexpression in WT and Ucp1 KO  
1848 BAs. **(Z)** Volcano plots showing the changes of H/L ratio between Cre- and GFP-infected  
1849 BAs (X axis) and -log10 p value (Y axis) after 24h, 48h and 72h of heavy labeling. Grey  
1850 box: proteins with higher turnover after ATF4-overexpression. **(AA)** Network analysis of  
1851 92 proteins with increased turnover rate at 24h, 48h and 72h timepoints in  
1852 <https://www.networkanalyst.ca/>. Most enriched biological processes, numbers of hits and  
1853 adjusted p values (AdjP) shown.

1854 **Supplementary Figure 6. Related to Figure 5.** Average night and day EE (**A**) and  
1855 regression plot of average EE as a function of body weight (**B**) in CP or LP-fed mice at  
1856 30°C. Red arrow: EE increase. Average night and day RER (**C**) and physical activity (**D**)  
1857 in ~12-week-old male C57bl/6J mice after 4-week CP or LP feeding at 30°C. Sample size:  
1858 CP (n=9) and LP (n=9). Average night and day food intake (**E**), 3-day cumulative food  
1859 intake curve (**F**) and total cumulative food intake (**G**) in ~12-week-old male C57bl/6J mice  
1860 after 4-week CP or LP feeding at 30°C. Sample size: CP (n=8) and LP (n=8). Q-PCR  
1861 analysis of mt-encoded ETC (**H**) and nuclear-encoded ETC genes (**I**) in the BAT of ~12-  
1862 week-old male C57bl/6J mice after 4-week CP or LP feeding at 30°C. Sample size: CP  
1863 (n=5) and LP (n=5). (**J**) Q-PCR analysis of ATF4 target genes in the muscle of ~12-week-  
1864 old male C57bl/6J mice after 4-week CP or LP feeding at 30°C. Sample size: CP (n=5)  
1865 and LP (n=5). (**K**) Immunoblots of puromycylated protein, ubiquitinated protein and Hsp90  
1866 in the muscle of ~12-week-old male C57bl/6J mice at *ad libitum* CP or LP feeding at 30°C.  
1867 Average night and day EE (**L**) and regression plot of average EE as a function of body  
1868 weight (**M**) in CP or LP-fed ~12-week-old male CON and Atf4<sup>BKO</sup> mice at 30°C. Red arrow:  
1869 EE increase. Average night and day RER (**N**) and physical activity (**O**) in CP or LP-fed  
1870 ~12-week-old male CON and Atf4<sup>BKO</sup> mice at 30°C. Sample size: CON-CP (n=7), CON-  
1871 LP (n=8), Atf4<sup>BKO</sup>-CP (n=8) and Atf4<sup>BKO</sup>-LP (n=7). Average night and day food intake (**P**),  
1872 3-day cumulative food intake curve (**Q**) and total cumulative food intake (**R**) in ~12-week-  
1873 old male C57bl/6J mice after 4-week CP or LP feeding at 30°C. Sample size: CON-CP  
1874 (n=7), CON-LP (n=8), Atf4<sup>BKO</sup>-CP (n=7) and Atf4<sup>BKO</sup>-LP (n=6). Q-PCR analysis of mtDNA-  
1875 encoded ETC genes (**S**) and nuclear-encoded ETC genes (**T**) in the BAT of the  
1876 aforementioned mice. Sample size: CON-CP (n=6), CON-LP (n=6), Atf4<sup>BKO</sup>-CP (n=5) and  
1877 Atf4<sup>BKO</sup>-LP (n=5). (**U**) Circulating Fgf21 levels in CP or LP-fed ~12-week-old male CON  
1878 and Atf4<sup>BKO</sup> mice at 30°C. Sample size: CON-CP (n=4), CON-LP (n=4), Atf4<sup>BKO</sup>-CP (n=5)  
1879 and Atf4<sup>BKO</sup>-LP (n=5). Data were presented as average ± SEM. Unpaired t-test. \*: p<0.05  
1880 and \*\*: p<0.01.

1881

1882 **Supplementary Figure 7. Related to Figure 6. (A)** Body weight of male CON and  
1883 *Lrpprc*<sup>BKO</sup> mice at RT and 30°C fed with normal chow (NC). **(B)** Body weight, lean mass,  
1884 fat mass, and fat percentage of ~8-month-old male CON and *Lrpprc*<sup>BKO</sup> mice at RT and  
1885 30°C. **(C)** Tissue mass of BAT, iWAT, and eWAT of ~8-month-old male CON and  
1886 *Lrpprc*<sup>BKO</sup> mice. Sample size: CON/RT (n=8), *Lrpprc*<sup>BKO</sup>/RT (n=10), CON/30°C (n=7) and  
1887 *Lrpprc*<sup>BKO</sup>/30°C (n=5). **(D)** Heatmap showing log<sub>2</sub> fold changes of known ATF4 target  
1888 genes in the BAT of *Lrpprc*<sup>BKO</sup> mice after HFD at both RT and 30°C. Sample size:  
1889 CON/RT/HFD (n=8), *Lrpprc*<sup>BKO</sup>/RT/HFD (n=7), CON/30°C/HFD (n=4) and  
1890 *Lrpprc*<sup>BKO</sup>/30°C/HFD (n=6). **(E)** Tissue mass of eWAT, iWAT, and BAT of male CON and  
1891 *Lrpprc*<sup>BKO</sup> mice at normal chow (NC) and after HFD. Sample size: male CON/NC/RT (n=8),  
1892 *Lrpprc*<sup>BKO</sup>/NC/RT (n=10), CON/4w-HFD/RT (n=8), *Lrpprc*<sup>BKO</sup>/4w-HFD/RT (n=6),  
1893 CON/12w-HFD/RT (n=5), *Lrpprc*<sup>BKO</sup>/12w-HFD/RT (n=5), CON/8w-HFD/30°C (n=4),  
1894 *Lrpprc*<sup>BKO</sup>/8w-HFD/30°C (n=6), CON/12w-HFD/30°C (n=6) and *Lrpprc*<sup>BKO</sup>/12w-HFD/30°C  
1895 (n=13). **(F)** Fat percentage, lean and fat mass of male CON and *Lrpprc*<sup>BKO</sup> mice before  
1896 and after 4-week and 12-week HFD at RT and 30°C. Sample size: CON/NC/RT (n=3),  
1897 *Lrpprc*<sup>BKO</sup>/NC/RT (n=7), CON/4w-HFD/RT (n=10), *Lrpprc*<sup>BKO</sup>/4w-HFD/RT (n=9),  
1898 CON/12w-HFD/RT (n=6), *Lrpprc*<sup>BKO</sup>/12w-HFD/RT (n=5), CON/NC/30°C (n=7),  
1899 *Lrpprc*<sup>BKO</sup>/NC/30°C (n=6), CON/4w-HFD/30°C (n=6), *Lrpprc*<sup>BKO</sup>/4w-HFD/30°C (n=8),  
1900 CON/12w-HFD/30°C (n=6) and *Lrpprc*<sup>BKO</sup>/12w-HFD/30°C (n=13). **(G)** Representative  
1901 H&E staining of eWAT from male CON and *Lrpprc*<sup>BKO</sup> mice after 12-week HFD. Scale bar:  
1902 100 μm. **(H)** Adipocyte size distribution in eWAT from male CON and *Lrpprc*<sup>BKO</sup> mice  
1903 after 12-week HFD. Total adipocytes counted: CON/RT (n=200), *Lrpprc*<sup>BKO</sup>/RT (n=519),  
1904 CON/30°C (n=347) and *Lrpprc*<sup>BKO</sup>/30°C (n=666). **(I)** Serum leptin levels in male CON and  
1905 *Lrpprc*<sup>BKO</sup> mice after 12-week. Sample size: CON/RT (n=5), *Lrpprc*<sup>BKO</sup>/RT (n=5),  
1906 CON/30°C (n=4) and *Lrpprc*<sup>BKO</sup>/30°C (n=8). **(J)** Q-PCR analysis of mRNA levels of  
1907 macrophage markers (*Cd68*, *Adgre1* and *Cd11c*) and pro-inflammatory cytokine (*Ccl2*) in  
1908 eWAT of male CON and *Lrpprc*<sup>BKO</sup> mice after 12-week HFD at RT and 30°C. Sample  
1909 size: CON/RT (n=7), *Lrpprc*<sup>BKO</sup>/RT (n=7), CON/30°C (n=8) and *Lrpprc*<sup>BKO</sup>/30°C (n=8). **(K)**  
1910 Body weight of female CON and *Lrpprc*<sup>BKO</sup> mice after 12-week HFD at RT and 30°C.  
1911 Sample size: CON/RT (n=8), *Lrpprc*<sup>BKO</sup>/RT (n=7), CON/30°C (n=11) and *Lrpprc*<sup>BKO</sup>/30°C  
1912 (n=17). **(L)** Body weight, lean mass, fat mass, and fat percentage of female CON and

1913 Lrprrc<sup>BKO</sup> mice after 12-week HFD. Sample size: CON/RT (n=8), Lrprrc<sup>BKO</sup>/RT (n=7),  
1914 CON/30°C (n=8) and Lrprrc<sup>BKO</sup>/30°C (n=11). **(M)** Tissue mass of eWAT, iWAT, and BAT  
1915 of female CON and Lrprrc<sup>BKO</sup> mice before and after HFD. Sample size: CON/RT (n=8),  
1916 Lrprrc<sup>BKO</sup>/RT (n=7), CON/30°C (n=18) and Lrprrc<sup>BKO</sup>/30°C (n=17). **(N)** Liver triglyceride  
1917 contents of female CON and Lrprrc<sup>BKO</sup> mice after 12-week HFD. Sample size: CON/RT  
1918 (n=8), Lrprrc<sup>BKO</sup>/RT (n=7), CON/30°C (n=8) and Lrprrc<sup>BKO</sup>/30°C (n=11). Average night  
1919 and day EE **(O)** and regression plots of average EE **(P)** as a function of body weight in  
1920 ~12-week-old male CON and Lrprrc<sup>BKO</sup> mice after 4-week HFD at 30°C. Average night  
1921 and day RER **(Q)** and regression plots of average RER **(R)** as a function of body weight  
1922 in the aforementioned mice. Average night and day physical activity **(S)** and regression  
1923 plots of average physical activity **(T)** as a function of body weight in the aforementioned  
1924 mice. Average night and day food intake **(U)** and regression plots of average food intake  
1925 **(V)** as a function of body weight in the aforementioned mice. Sample size: CON/30°C  
1926 (n=4) and Lrprrc<sup>BKO</sup>/30°C (n=7). **(W)** Body weight of male CON and Atf4<sup>BKO</sup> mice under  
1927 12-week HFD. Sample size: CON/RT (n=10), Atf4<sup>BKO</sup>/RT (n=10), CON/30°C (n=13) and  
1928 Atf4<sup>BKO</sup>/30°C (n=13). **(X)** Body weight, lean mass, fat mass, and fat percentage of male  
1929 CON and Atf4<sup>BKO</sup> mice under 12-week HFD. **(Y)** Tissue mass of BAT, iWAT, and eWAT  
1930 of male CON and Atf4<sup>BKO</sup> mice under 12-week HFD. **(Z)** Serum glucose levels during ITT  
1931 in male CON and Atf4<sup>BKO</sup> mice after 12-week HFD. **(AA)** Area under the curve (AUC)  
1932 values of glucose levels in ITTs showed. Sample size: CON/RT (n=5), Atf4<sup>BKO</sup>/RT (n=8),  
1933 CON/30°C (n=16) and Atf4<sup>BKO</sup>/30°C (n=8). Serum insulin **(AB)**, serum triglyceride  
1934 contents **(AC)** and liver triglyceride contents **(AD)** of male CON and Atf4<sup>BKO</sup> mice after  
1935 HFD. Sample size: CON/RT (n=5), Atf4<sup>BKO</sup>/RT (n=8), CON/30°C (n=8) and Atf4<sup>BKO</sup>/30°C  
1936 (n=8). **(AE)** Fat tissue mass of male CON, Lrprrc<sup>BKO</sup> and Lrprrc;Atf4<sup>BKO</sup> mice after 12-  
1937 week HFD at RT. Sample size: CON (n=10), Lrprrc<sup>BKO</sup> (n=5), and Lrprrc;Atf4<sup>BKO</sup> (n=5).  
1938 **(AF)** Representative H&E staining of eWAT from male CON, Lrprrc<sup>BKO</sup> and  
1939 Lrprrc;Atf4<sup>BKO</sup> mice after 12-week HFD. Scale bar: 50µm. **(AG)** Adipocyte size  
1940 distribution in eWAT from male CON, Lrprrc<sup>BKO</sup> and Lrprrc;Atf4<sup>BKO</sup> mice after 12-week  
1941 HFD. Total adipocytes counted: CON (n=1020), Lrprrc<sup>BKO</sup> (n=935), and Lrprrc;Atf4<sup>BKO</sup>  
1942 (n=1133). **(AH)** Fat tissue mass of male CON, Lrprrc<sup>BKO</sup> and Lrprrc;Atf4<sup>BKO</sup> mice after  
1943 12-week HFD at 30°C. Sample size: CON (n=9), Lrprrc<sup>BKO</sup> (n=6), and Lrprrc;Atf4<sup>BKO</sup>

1944 (n=5). **(AI)** Representative H&E staining of eWAT from male CON, *Lrprrc*<sup>BKO</sup> and  
1945 *Lrprrc*;*Atf4*<sup>BKO</sup> mice after 12-week HFD. Scale bar: 50µm. **(AJ)** Adipocyte size distribution  
1946 in eWAT from male CON, *Lrprrc*<sup>BKO</sup> and *Lrprrc*;*Atf4*<sup>BKO</sup> mice after 12-week HFD. Total  
1947 adipocytes counted: CON (n=681), *Lrprrc*<sup>BKO</sup> (n=983), and *Lrprrc*;*Atf4*<sup>BKO</sup> (n=945). **(AK)**  
1948 Heatmap showing log2 fold changes of known ATF4 target genes in the BAT of ATF4<sup>BOX</sup>  
1949 mice after 12-week HFD at both RT and 30°C. Sample size: CON/RT (n=8), ATF4<sup>BOX</sup>/RT  
1950 (n=7), CON/30°C (n=4) and ATF4<sup>BOX</sup>/30°C (n=6). **(AL)** Adipocyte size distribution in  
1951 eWAT from male CON and ATF4<sup>BOX</sup> mice after 12-week HFD. Total adipocytes counted:  
1952 CON/RT (n=2647), ATF4<sup>BOX</sup>/RT (n=2312), CON/30°C (n=1868) and ATF4<sup>BOX</sup>/30°C  
1953 (n=2650). **(AM)** Q-PCR analysis of mRNA levels of macrophage markers (*Cd68*, *Adgre1*  
1954 and *Cd11c*) and pro-inflammatory cytokine (*Ccl2*) in eWAT of male CON and ATF4<sup>BOX</sup>  
1955 mice after 12-week HFD. Sample size: CON/RT (n=8), ATF4<sup>BOX</sup>/RT (n=8), CON/30°C  
1956 (n=7) and ATF4<sup>BOX</sup>/30°C (n=5). **(AN)** Body weight of female CON and ATF4<sup>BOX</sup> mice after  
1957 12-week HFD at RT and 30°C. Sample size: CON/RT (n=7), ATF4<sup>BOX</sup>/RT (n=8),  
1958 CON/30°C (n=5) and ATF4<sup>BOX</sup> /30°C (n=6). **(AO)** Tissue mass of eWAT, iWAT, and BAT  
1959 of female CON and ATF4<sup>BOX</sup> mice before and after HFD. Sample size: CON/RT (n=6),  
1960 ATF4<sup>BOX</sup>/RT (n=8), CON/30°C (n=5) and ATF4<sup>BOX</sup>/30°C (n=5). **(AP)** Liver triglyceride  
1961 contents of female CON and ATF4<sup>BOX</sup> mice after 12-week HFD. Sample size: CON/RT  
1962 (n=7), ATF4<sup>BOX</sup>/RT (n=8), CON/30°C (n=5) and ATF4<sup>BOX</sup> /30°C (n=5). **(AQ)**  
1963 Representative H&E staining of iWAT from male CON, *Lrprrc*<sup>BKO</sup>, *Atf4*<sup>BKO</sup>, *Lrprrc*;*Atf4*<sup>BKO</sup>  
1964 and ATF4<sup>BOX</sup> mice after 12-week HFD at RT and 30°C. Red arrows: multilocular beige  
1965 adipocytes. Scale bar: 50µm. **(AR)** Heatmap showing fold change values (Log2FC) of  
1966 thermogenic genes in iWAT of *Lrprrc*;*Atf4*<sup>BKO</sup>, ATF4<sup>BOX</sup> and *Atf4*<sup>BKO</sup> mice after 12-week  
1967 HFD at RT. Data were presented as average ± SEM. Unpaired t-test. \*: p<0.05 and \*\*:   
1968 p<0.01.  
1969

1970 **Supplementary Table 1. (separate EXCEL file)**

1971 Excel table of mass spectrometry data of mitochondrial proteome from CON and  
1972 Lrpprc<sup>BKO</sup> mice at RT and 30°C.

1973

1974 **Supplementary Table 2. (separate EXCEL file)**

1975 Excel table of mass spectrometry data of pSILAC in GFP- and Cre-infected brown  
1976 adipocytes in wild-type and Ucp1 deficient background.

1977

1978



1979

**Supplementary Table 3. Composition of diets**

|                     | <b>CP (control diet)</b> |              | <b>LP (low-protein diet)</b> |              |
|---------------------|--------------------------|--------------|------------------------------|--------------|
|                     | <b>g%</b>                | <b>kcal%</b> | <b>g%</b>                    | <b>kcal%</b> |
| Protein             | 23.4                     | 24.9         | 4.7                          | 5            |
| Carbohydrate        | 59.9                     | 62.1         | 78.6                         | 82           |
| Fat                 | 5.4                      | 13           | 5.4                          | 13           |
| Total kcal/g        | 3.76                     |              | 3.76                         |              |
| <b>Ingredient</b>   | <b>g</b>                 | <b>kcal</b>  | <b>g</b>                     | <b>kcal</b>  |
| Casein              | 250                      | 1000         | 50                           | 200          |
| L-Cystine           | 3.8                      | 15.2         | 1.05                         | 4.2          |
| Corn Starch         | 261                      | 1044         | 463.75                       | 1855         |
| Maltodextrin 10     | 110                      | 440          | 110                          | 440          |
| Dextrose            | 244                      | 976          | 244                          | 976          |
| Cellulose, BW200    | 75                       | 0            | 75                           | 0            |
| Inulin              | 25                       | 37.5         | 25                           | 37.5         |
| Soybean Oil         | 59                       | 531          | 59                           | 531          |
| Mineral Mix S10026  | 10                       | 0            | 10                           | 0            |
| Dicalcium Phosphate | 13                       | 0            | 13                           | 0            |
| Calcium Carbonate   | 5.5                      | 0            | 5.5                          | 0            |
| Potassium Citrate   | 16.5                     | 0            | 16.5                         | 0            |
| Vitamin Mix V10001  | 10                       | 40           | 10                           | 40           |
| Choline Bitartrate  | 2                        | 0            | 2                            | 0            |
| <b>Total</b>        | <b>1084.8</b>            | <b>4084</b>  | <b>1084.8</b>                | <b>4084</b>  |

1980

1981

**Supplementary Table 4: List of primer sequences for q-PCR**


---

|           |                           |
|-----------|---------------------------|
| 36B4-F    | TTTGGGCATCACCACGAAAA      |
| 36B4-R    | GGACACCCTCCAGAAAGCGA      |
| Lrpprc-F  | AGCCTGCTCCTGTGAGAAAG      |
| Lrpprc-R  | TCCCAGATCTTGTGAGCAA       |
| mt-Nd4-F  | CTAATAATCGCACATGGCCTC     |
| mt-Nd4-R  | CGTAGTTGGAGTTTGCTAGG      |
| mt-Nd5-F  | CATCCTTCTCAACTTTACTGGG    |
| mt-Nd5-R  | TTTATGGGTGTAATGCGGT       |
| mt-Cyb-F  | CCATTCTACGCTCAATCCCCA     |
| mt-Cyb-R  | AGGCTTCGTTGCTTTGAGGTA     |
| mt-Co1-F  | ACACAACCTTTCTTTGATCCCG    |
| mt-Co1-R  | AGAATCAGAACAGATGCTGG      |
| mt-Co2-F  | ATAATCCCAACAAACGACCT      |
| mt-Co2-R  | CTCGGTTATCAACTTCTAGCA     |
| mt-Co3-F  | GGTATAATTCTATTCATCGTCTCGG |
| mt-Co3-R  | AGAACGCTCAGAAGAATCCT      |
| mt-Atp8-F | GGCACCTTCACCAAATCACT      |
| mt-Atp8-R | GGGGTAATGAATGAGGCAAATAGA  |
| mt-Atp6-F | CCTTCAATCCTATTCCCATCC     |
| mt-Atp6-R | GTTGGAAAGAATGGAGACGG      |
| Ndufs1-F  | AGGATATGTTTCGCACAACTGG    |
| Ndufs1-R  | TCATGGTAACAGAATCGAGGGA    |
| Ndufs4-F  | CTGCCGTTTCCGTCTGTAGAG     |
| Ndufs4-R  | TGTTATTGCGAGCAGGAACAAA    |
| Ndufs8-F  | AGTGGCGGCAACGTACAAG       |
| Ndufs8-R  | TCGAAAGAGGTAAGTTAGGGTCA   |
| Sdha-F    | GGAACACTCCAAAACAGACCT     |
| Sdha-R    | CCACCACTGGGTATTGAGTAGAA   |
| Sdha-F    | AATTTGCCATTTACCGATGGGA    |
| Sdha-R    | AGCATCCAACACCATAGGTCC     |

---

---

|          |                         |
|----------|-------------------------|
| Sdhc-F   | GCTGCGTTCTTGCTGAGACA    |
| Sdhc-R   | ATCTCCTCCTTAGCTGTGGTT   |
| Sdhd-F   | TGGTCAGACCCGCTTATGTG    |
| Sdhd-R   | GGTCCAGTGGAGAGATGCAG    |
| Cyc1-F   | CAGCTTCCATTGCGGACAC     |
| Cyc1-R   | GGCACTCACGGCAGAATGAA    |
| Cox4-F   | ATGTCACGATGCTGTCTGCC    |
| Cox4-R   | GTGCCCTGTTCATCTCGGC     |
| Cox4i1-F | ATTGGCAAGAGAGCCATTTCTAC |
| Cox4i1-R | CACGCCGATCAGCGTAAGT     |
| Cox5a-F  | GGGTCACACGAGACAGATGA    |
| Cox5a-R  | CCAAGATGCGAACAGCACTA    |
| Cox5b-F  | GATGAGGAGCAGGCTACTGG    |
| Cox5b-R  | TGCAGCCCACTATTCTCTTG    |
| Cox6b1-F | CCCCAACCAGAACCAGACTA    |
| Cox6b1-R | GATCTTCCCAGGAAATGTGC    |
| Atp5a1-F | TCTCCATGCCTCTAACACTCG   |
| Atp5a1-R | CCAGGTCAACAGACGTGTCAG   |
| Atp5j2-F | TGCCGAGCTGGATAATGATGC   |
| Atp5j2-R | ACCATGCTAATCCCCGAGATG   |
| Atp5b-F  | GCAAGGCAGGGACAGCAGA     |
| Atp5b-R  | CCAAGGTCTCAGGACCAACA    |
| Gdf15-F  | CTGGCAATGCCTGAACAACG    |
| Gdf15-R  | GGTCGGGACTTGGTTCTGAG    |
| Fgf21-F  | GTGTCAAAGCCTCTAGGTTTCTT |
| Fgf21-R  | GGTACACATTGTAACCGTCCTC  |
| Ddit3-F  | CTGCCTTTCACCTTGGAGAC    |
| Ddit3-R  | GGACGCAGGGTCAAGAGTTAG   |
| Trib3-F  | GGGGCCTTATATCCTTTTGG    |
| Trib3-R  | GCAGGGTACACCTTGACAG     |
| Atf5-F   | CCTTGCCCTTGCCACCTTTGAC  |

---

---

|           |                         |
|-----------|-------------------------|
| Atf5-R    | CCAGAGGAGGAGGCTGCTGT    |
| Atf3-F    | GCTGCCAAGTGTGCAAACAAG   |
| Atf3-R    | CAGTTTTCCAATGGCTTCAGG   |
| Lonp1-F   | TGAGCTGCAAGATGTTCTGG    |
| Lonp1-R   | AGCCCCAATTCCTTCTTGAT    |
| Cyb5r1-F  | CTACCTCTCTGCCCGAATTG    |
| Cyb5r1-R  | CCCAATCTTCAGGCTATCCA    |
| Aldh1l2-F | CACCCCTGTGATTGAGGACT    |
| Aldh1l2-R | GCCTCTTCGTCTCTCCTCT     |
| Psat1-F   | TGCTCGAAATGACTCACAGG    |
| Psat1-R   | CAGCACTCCTTCCAGCTTTC    |
| Atf4-F    | AAGGAGGAAGACACTCCCTCT   |
| Atf4-R    | CAGGTGGGTCATAAGGTTTGG   |
| Mthfd2-F  | AGGTCCCAAGCCTTTGAGTT    |
| Mthfd2-R  | GTAAGGGAGTGCCGTTGAAA    |
| Pck2-F    | ATGGCTGCTATGTACCTCCC    |
| Pck2-R    | GCGCCACAAAGTCTCGAAC     |
| Dhrs9-F   | TACCTCCTCGGTGAACTTGG    |
| Dhrs9-R   | TGGGATTTGCCAGCTCTACT    |
| Mmp28-F   | GAGGCGTAAGAAACGCTTTG    |
| Mmp28-R   | CCAGAACTCCAGTGCTGACA    |
| Bmal1-F   | TGACCCTCATGGAAGGTTAGAA  |
| Bmal1-R   | GGACATTGCATTGCATGTTGG   |
| Ucp1-F    | ACTGCCACACCTCCAGTCATT   |
| Ucp1-R    | CTTTGCCTCACTCAGGATTGG   |
| Cox8b-F   | GAACCATGAAGCCAACGACT    |
| Cox8b-R   | GCGAAGTTCACAGTGGTTCC    |
| Cidea-F   | TGCTCTTCTGTATCGCCCAGT   |
| Cidea-R   | GCCGTGTTAAGGAATCTGCTG   |
| Dio2-F    | CAGTGTGGTGCACGTCTCCAATC |
| Dio2-R    | TGAACCAAAGTTGACCACCAG   |

---

|          |                            |
|----------|----------------------------|
| Pgc1a-F  | AGCCGTGACCACTGACAACGAG     |
| Pgc1a-R  | GCTGCATGGTTCTGAGTGCTAAG    |
| Cd68-F   | GCAGCACAGTGGACATTCAT       |
| Cd68-R   | TTGCATTTCCACAGCAGAAG       |
| Adgre1-F | TTTCCTCGCCTGCTTCTTC        |
| Adgre1-R | CCCCGTCTCTGTATTCAACC       |
| Cd11c-F  | CAGAACTTCCCAACTGCACA       |
| Cd11c-R  | TCTCTGAAGCTGGCTCATCA       |
| Ccl2-F   | CTTCTGGGCCTGCTGTTCA        |
| Ccl2-R   | CCAGCCTACTCATTGGGATCA      |
| Gyk-F    | TTCCAGGAAATAATAACTTTGTCAAG |
| Gyk-R    | CACTGCACTGAAATACGTGCT      |
| Ldhb-F   | ACAAGTGGGTATGGCATGTG       |
| Ldhb-R   | ACATCCACCAGGGCAAGTT        |
| Acaa2-F  | CCTCAGTTCTTGTCTGTTTCCAG    |
| Acaa2-R  | AGGTGTGCGGTGATTCTG         |
| Plin5-F  | GTGAATCGAGTGGTGGCTTT       |
| Plin5-R  | CAGGGCACAGGTAGTCACAC       |
| Hoxc9-F  | GCAGCAAGCACAAAGAGGAGAAG    |
| Hoxc9-R  | GCGTCTGGTACTTGGTGTAGGG     |
| Prdm16-F | TGGCCTTCATCACCTCTCTGAA     |
| Prdm16-R | TTTCTGATCCACGGCTCCTGTGA    |
| Ryr2-F   | ATGGCTTTAAGGCAGAGCG        |
| Ryr2-R   | CAGAGCCCGAATCATCCAGC       |
| Atp2a2-F | ACCTTTGCCGCTCATTTTCCAG     |
| Atp2a2-R | AGGCTGCACACACTCTTTACC      |
| Slc6a8-F | TGCATATCTCCAAGGTGGCAG      |
| Slc6a8-R | CTACAAACTGGCTGTCCAGA       |
| Ckmt1-F  | TGAGGAGACCTATGAGGTATTTGC   |
| Ckmt1-R  | TCATCAAAGTAGCCAGAACGG      |
| Ckmt2-F  | GCATGGTGGCTGGTGTATGAG      |

|           |                           |
|-----------|---------------------------|
| Ckmt2-R   | AAACTGCCCGTGAGTAATCTTG    |
| Gatm-F    | GACCTGGTCTTGTGCTCTCC      |
| Gatm-R    | GGGATGACTGGTGTTGGAGG      |
| Gatmt-F   | GCAGCCACATAAGGTTGTTCC     |
| Gatmt-R   | CTCTTCAGACAGCGGGTACG      |
| Slc3a2-F  | TGCTCAGGCTGACATTGTAGC     |
| Slc3a2-R  | TCAGCCAAGTACAAGGGTGC      |
| Slc7a1-F  | AATTATCATCTTAACAGGACTG    |
| Slc7a1-R  | GACCAGGACATTGATACA        |
| Slc7a11-F | TGGAAGTCTCGTAATAC         |
| Slc7a11-R | G TTCAGGAATTTACATTGA      |
| Slc38a2-F | GACACAGTAAGTGAGTGACG      |
| Slc38a2-R | CTCTCTTTGGATACCTGACC      |
| Nfe2l1-F  | GACAAGATCATCAACCTGCCTGTAG |
| Nfe2l1-R  | GCTCACTTCCTCCGGTCCTTTG    |
| Psm1-F    | TGCGTGCGTTTTTTGATTTTAGAC  |
| Psm1-R    | CCCTCAGGGCAGGATTCATC      |
| Psm1b-F   | CGTTGAAGGCATAAGGCGAAAA    |
| Psm1b-R   | TTCCACTGCTGCTTACCGAG      |
| Psm1d-F   | GTGATAAAACACTTTTCGAGGCCA  |
| Psm1d-R   | TGAATGCAGTCGTGAATGACTT    |
| Atg5-F    | TAGAATATATCAGACCACGACG    |
| Atg5-R    | CTCCTCTTCTCTCCATCTTC      |
| Atg7-F    | TCCGTTGAAGTCCTCTGCTT      |
| Atg7-R    | CCACTGAGGTTACCATCCT       |
| Beclin-F  | GGCCAATAAGATGGGTCTGA      |
| Beclin-R  | GCTGCACACAGTCCAGAAAA      |
| Lc3b-F    | ACAAAGAGTGGAAGATGTCCGGCT  |
| Lc3b-R    | TGCAAGCGCCGTCTGATTATCTTG  |
| Ulk-F     | AGATTGCTGACTTTGGATTC      |
| Ulk-R     | AGCCATGTACATAGGAGAAC      |

---

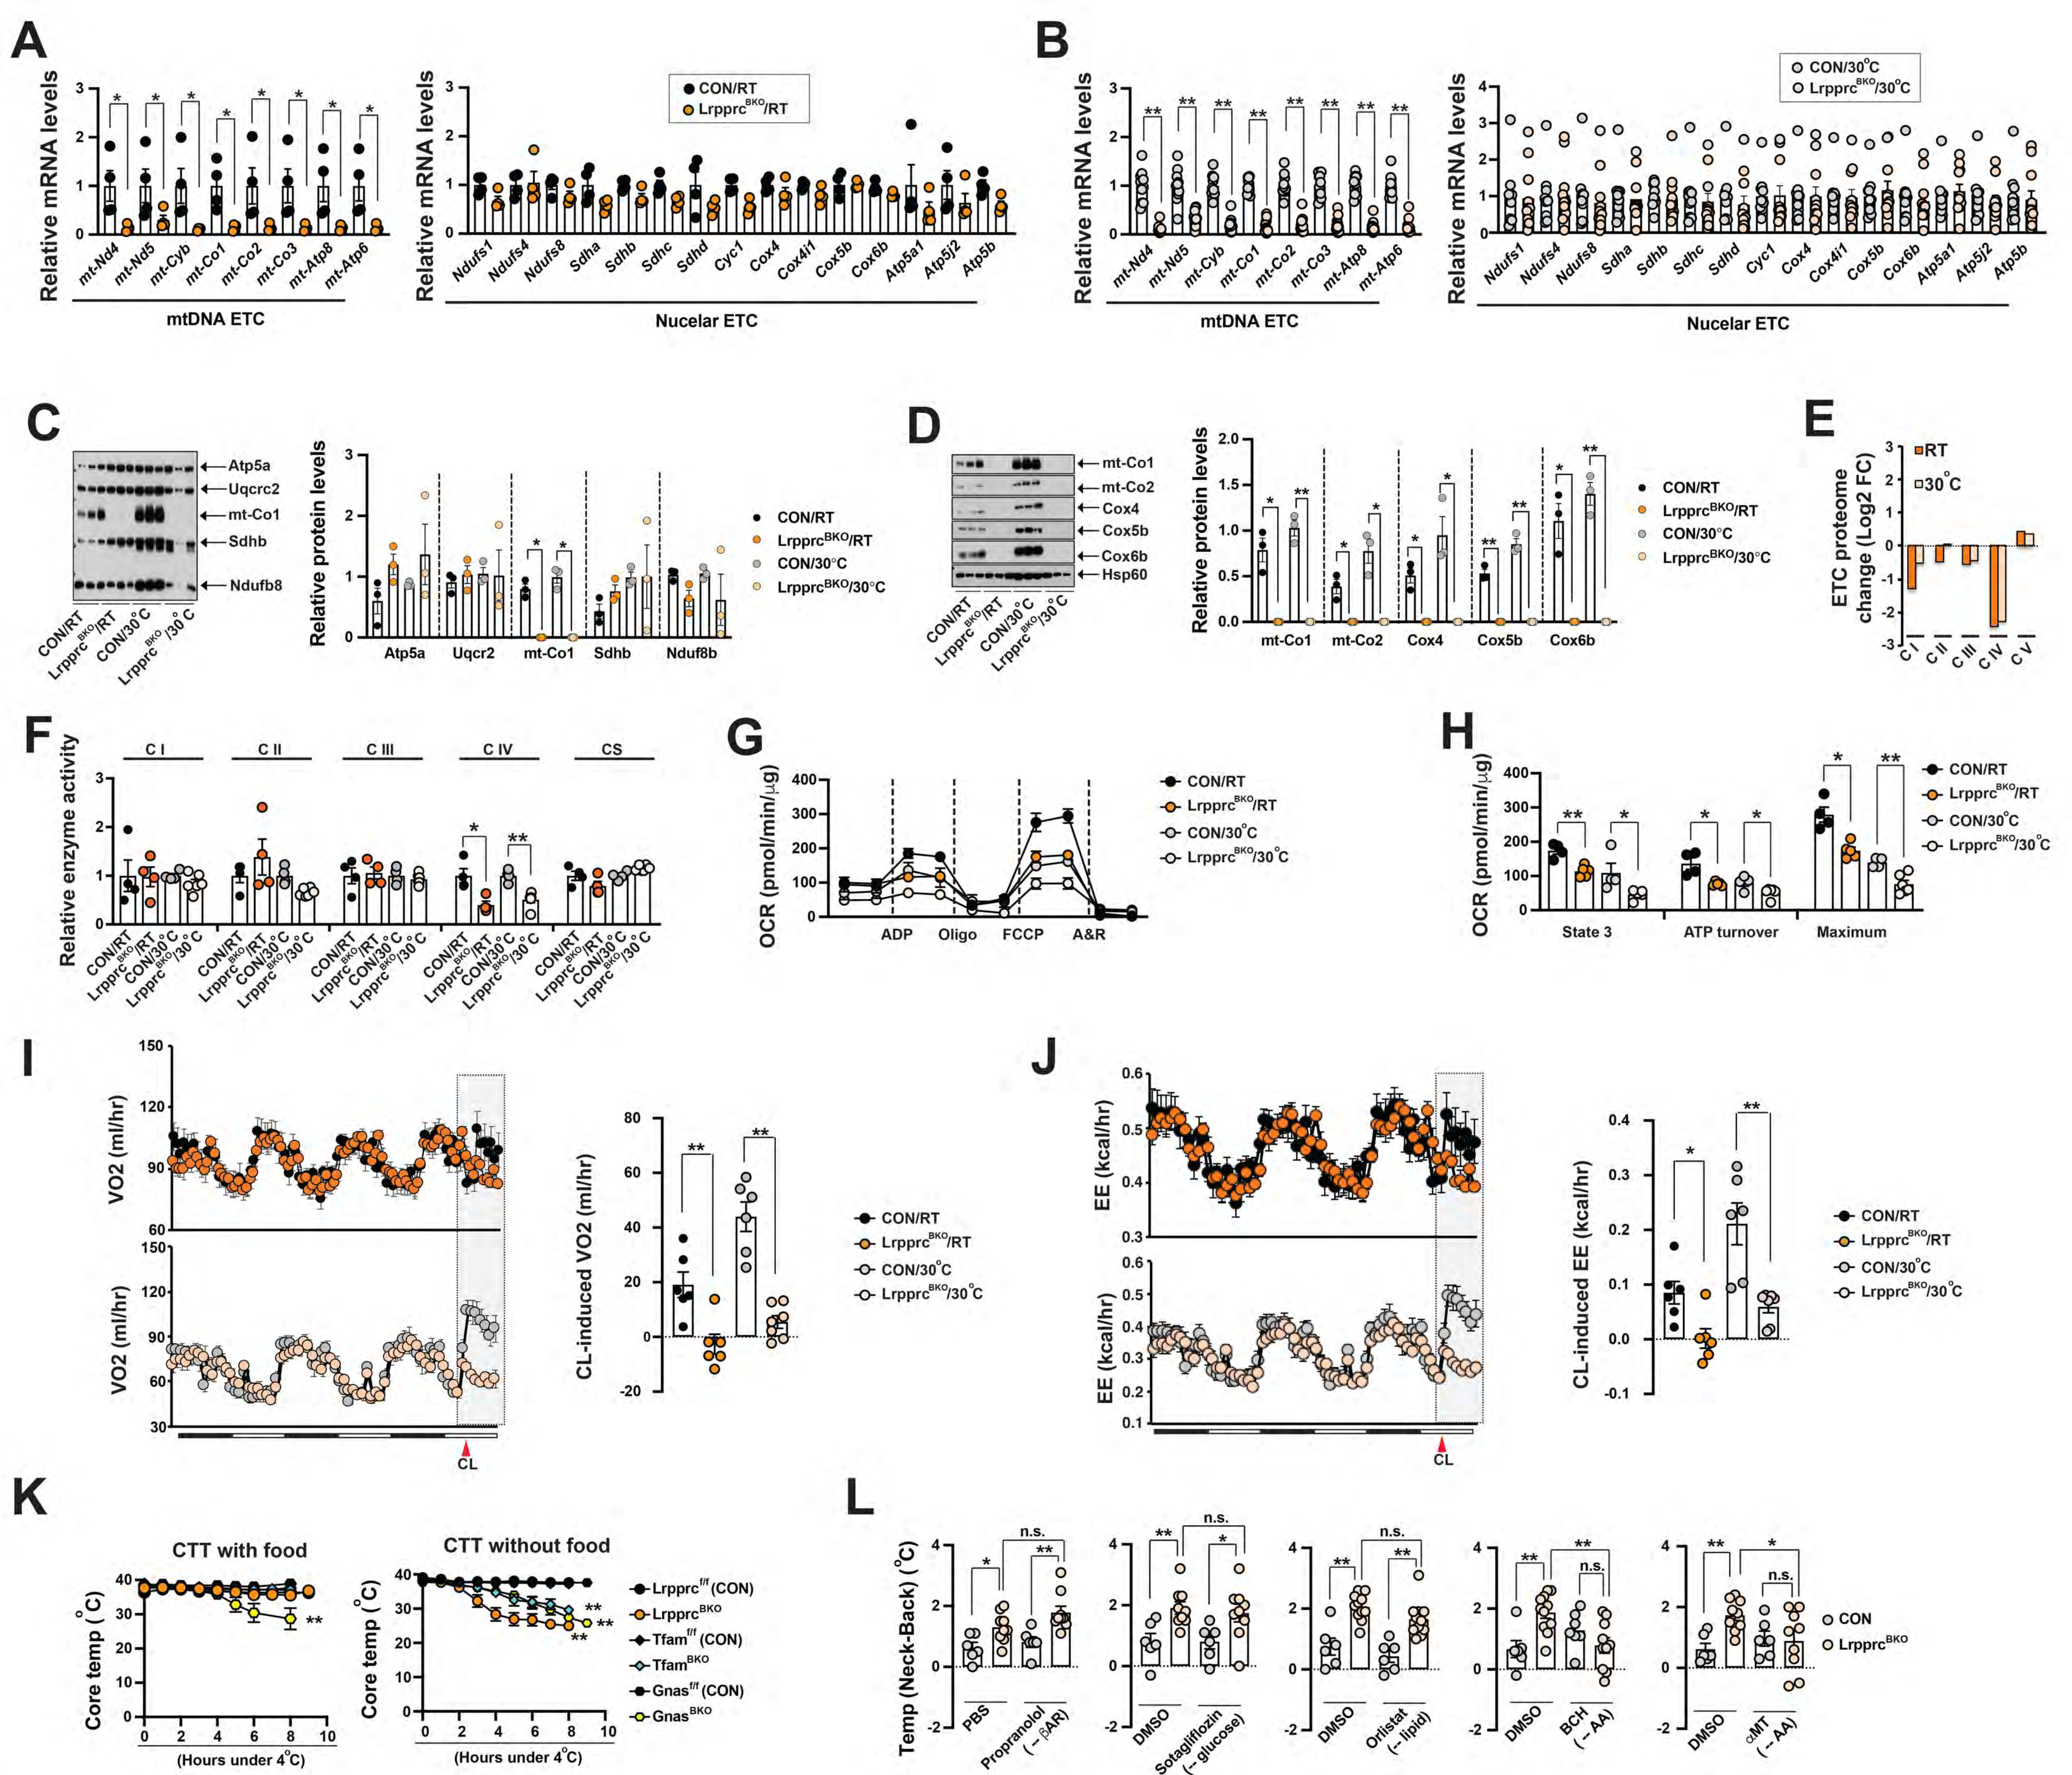

**Figure 1**

**A**

| TF                   | Motif | # Targets |
|----------------------|-------|-----------|
| ATF4                 |       | 39        |
| ATF3/CREG1           |       | 46        |
| CEBP $\alpha$ /DDIT3 |       | 26        |
| NFKB1                |       | 14        |
| SRF                  |       | 14        |

**B**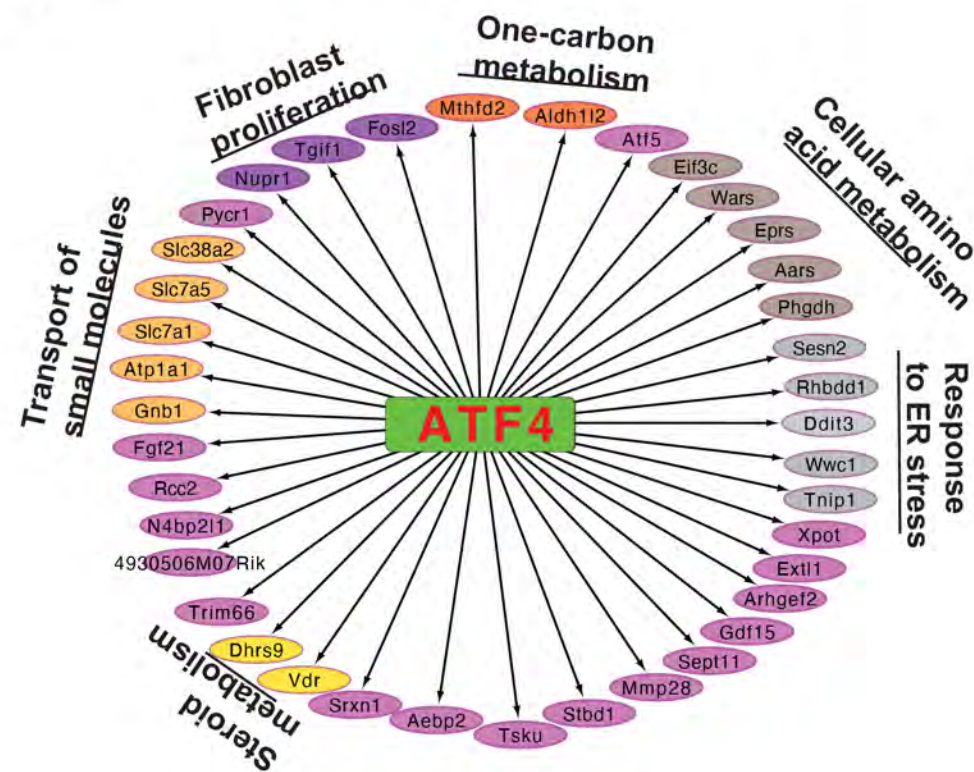**C**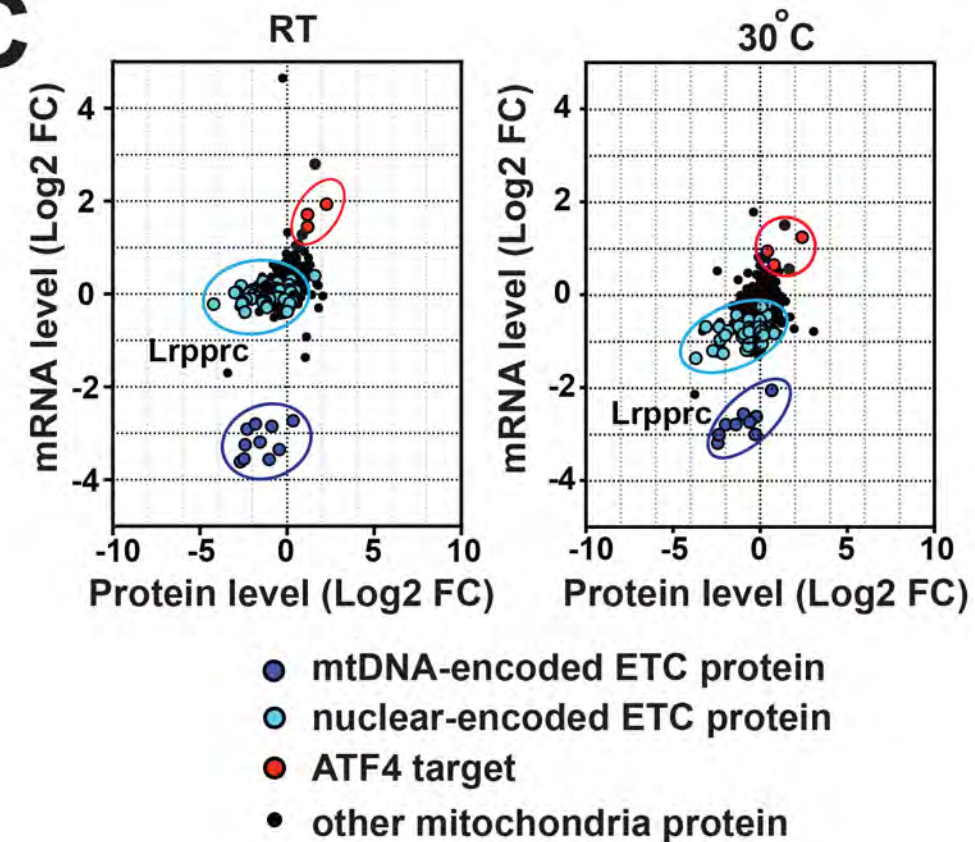**D**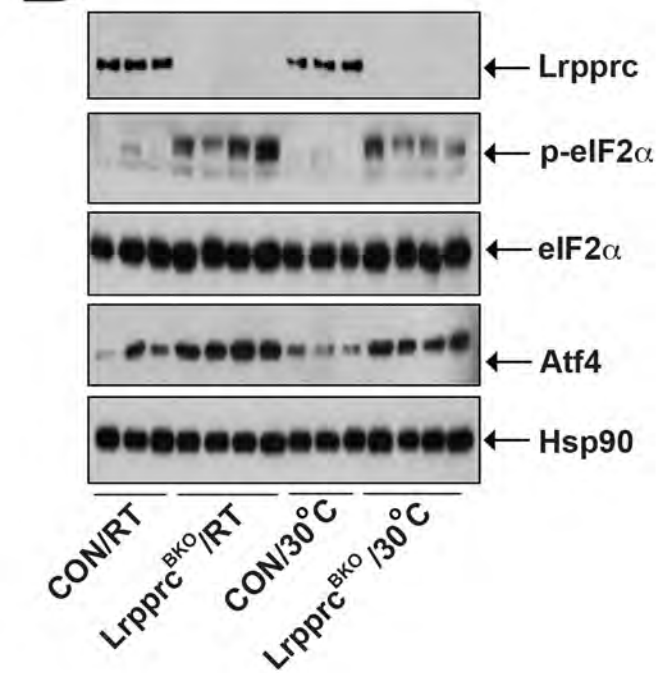

Relative protein levels

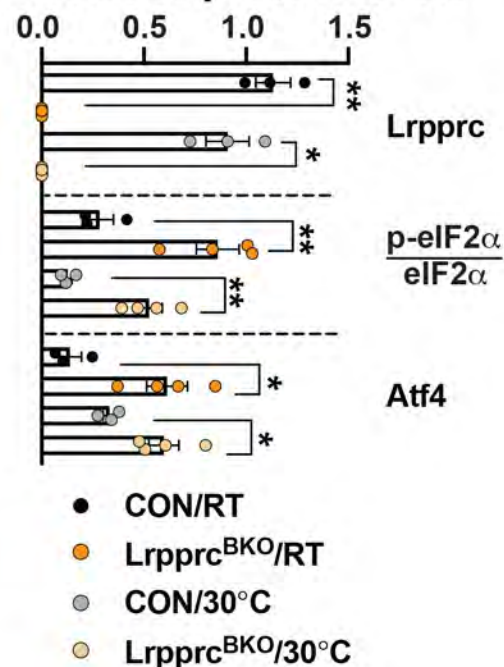**E**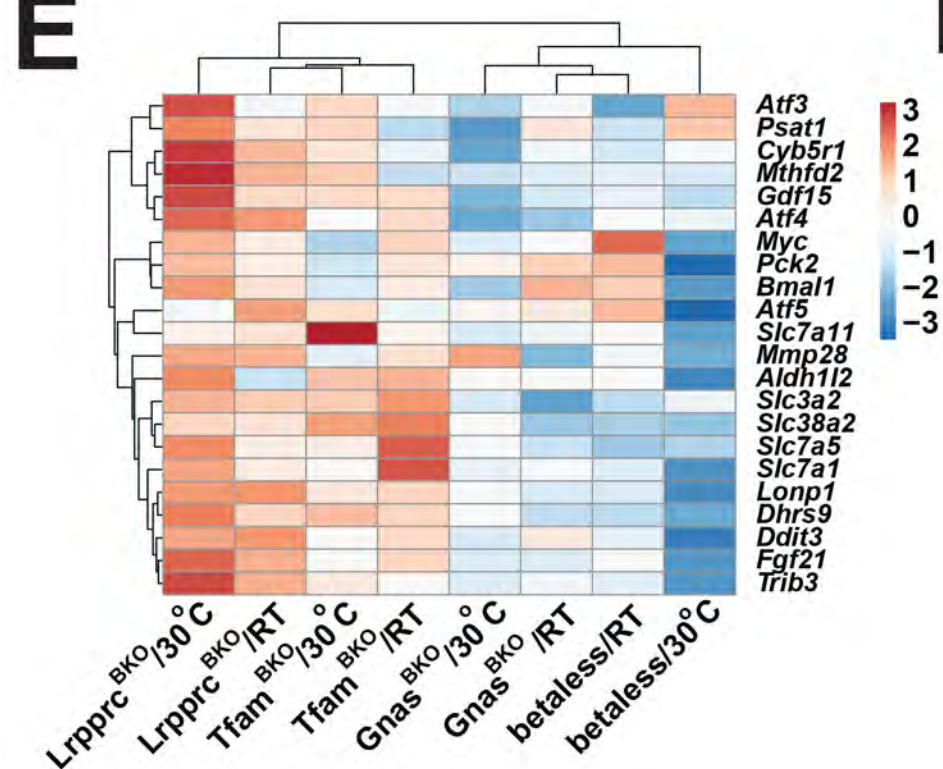**F**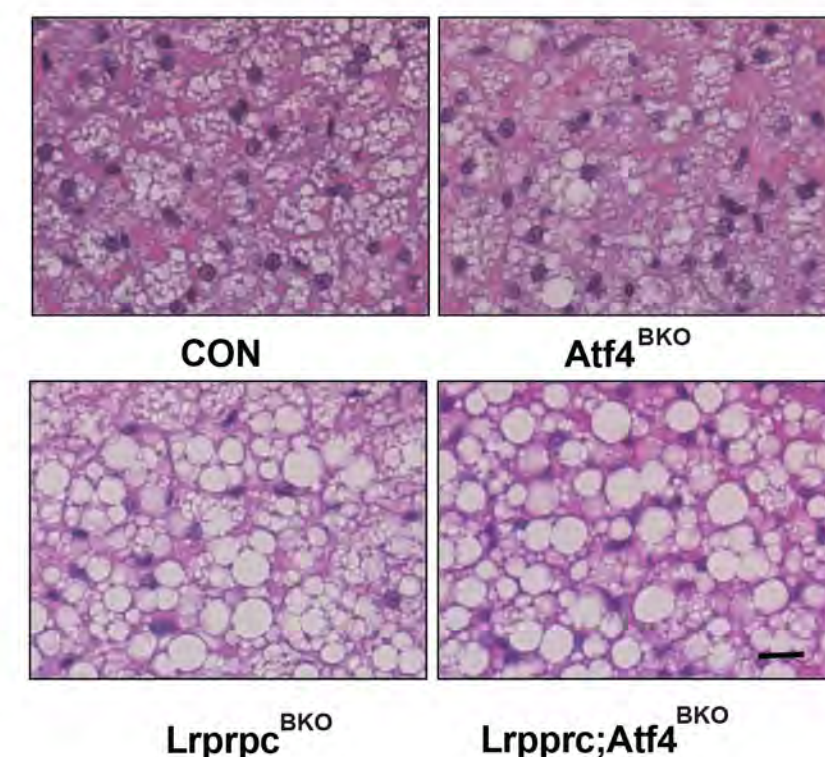**G**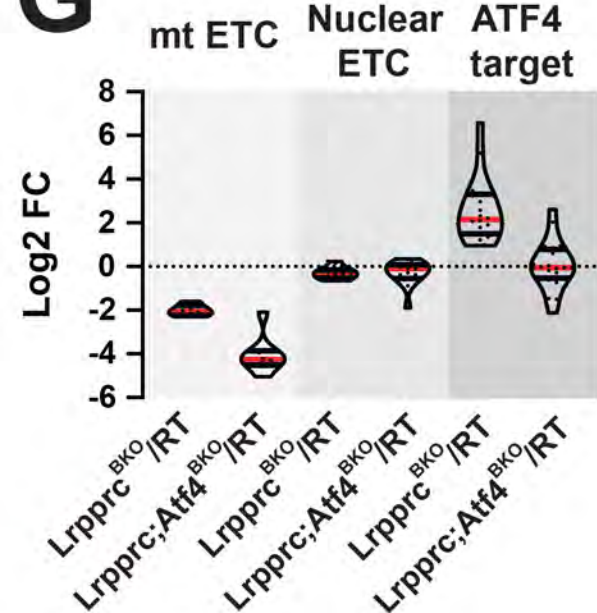**H**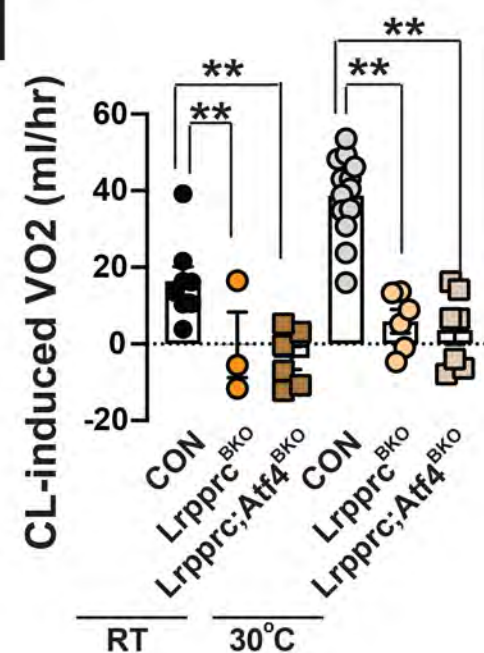**I**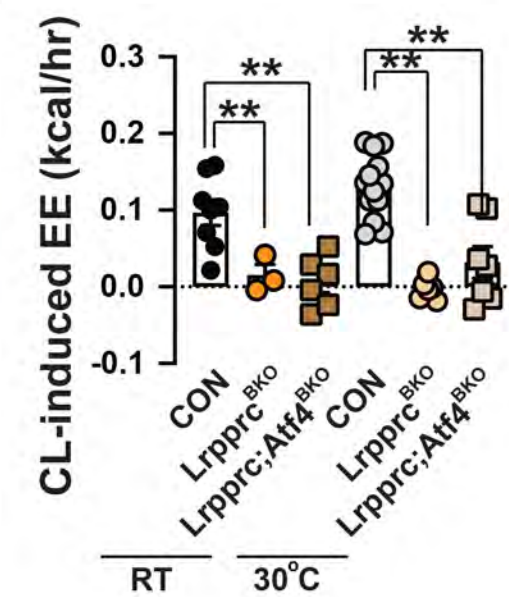**J**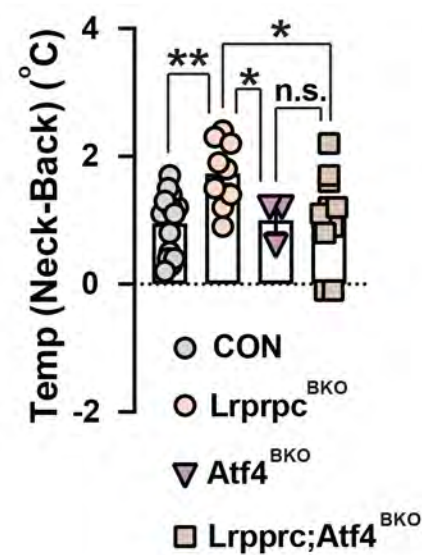**K**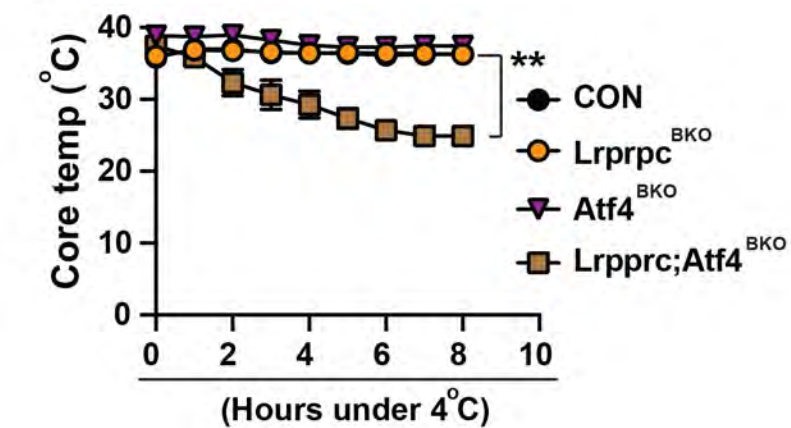**Figure 2**



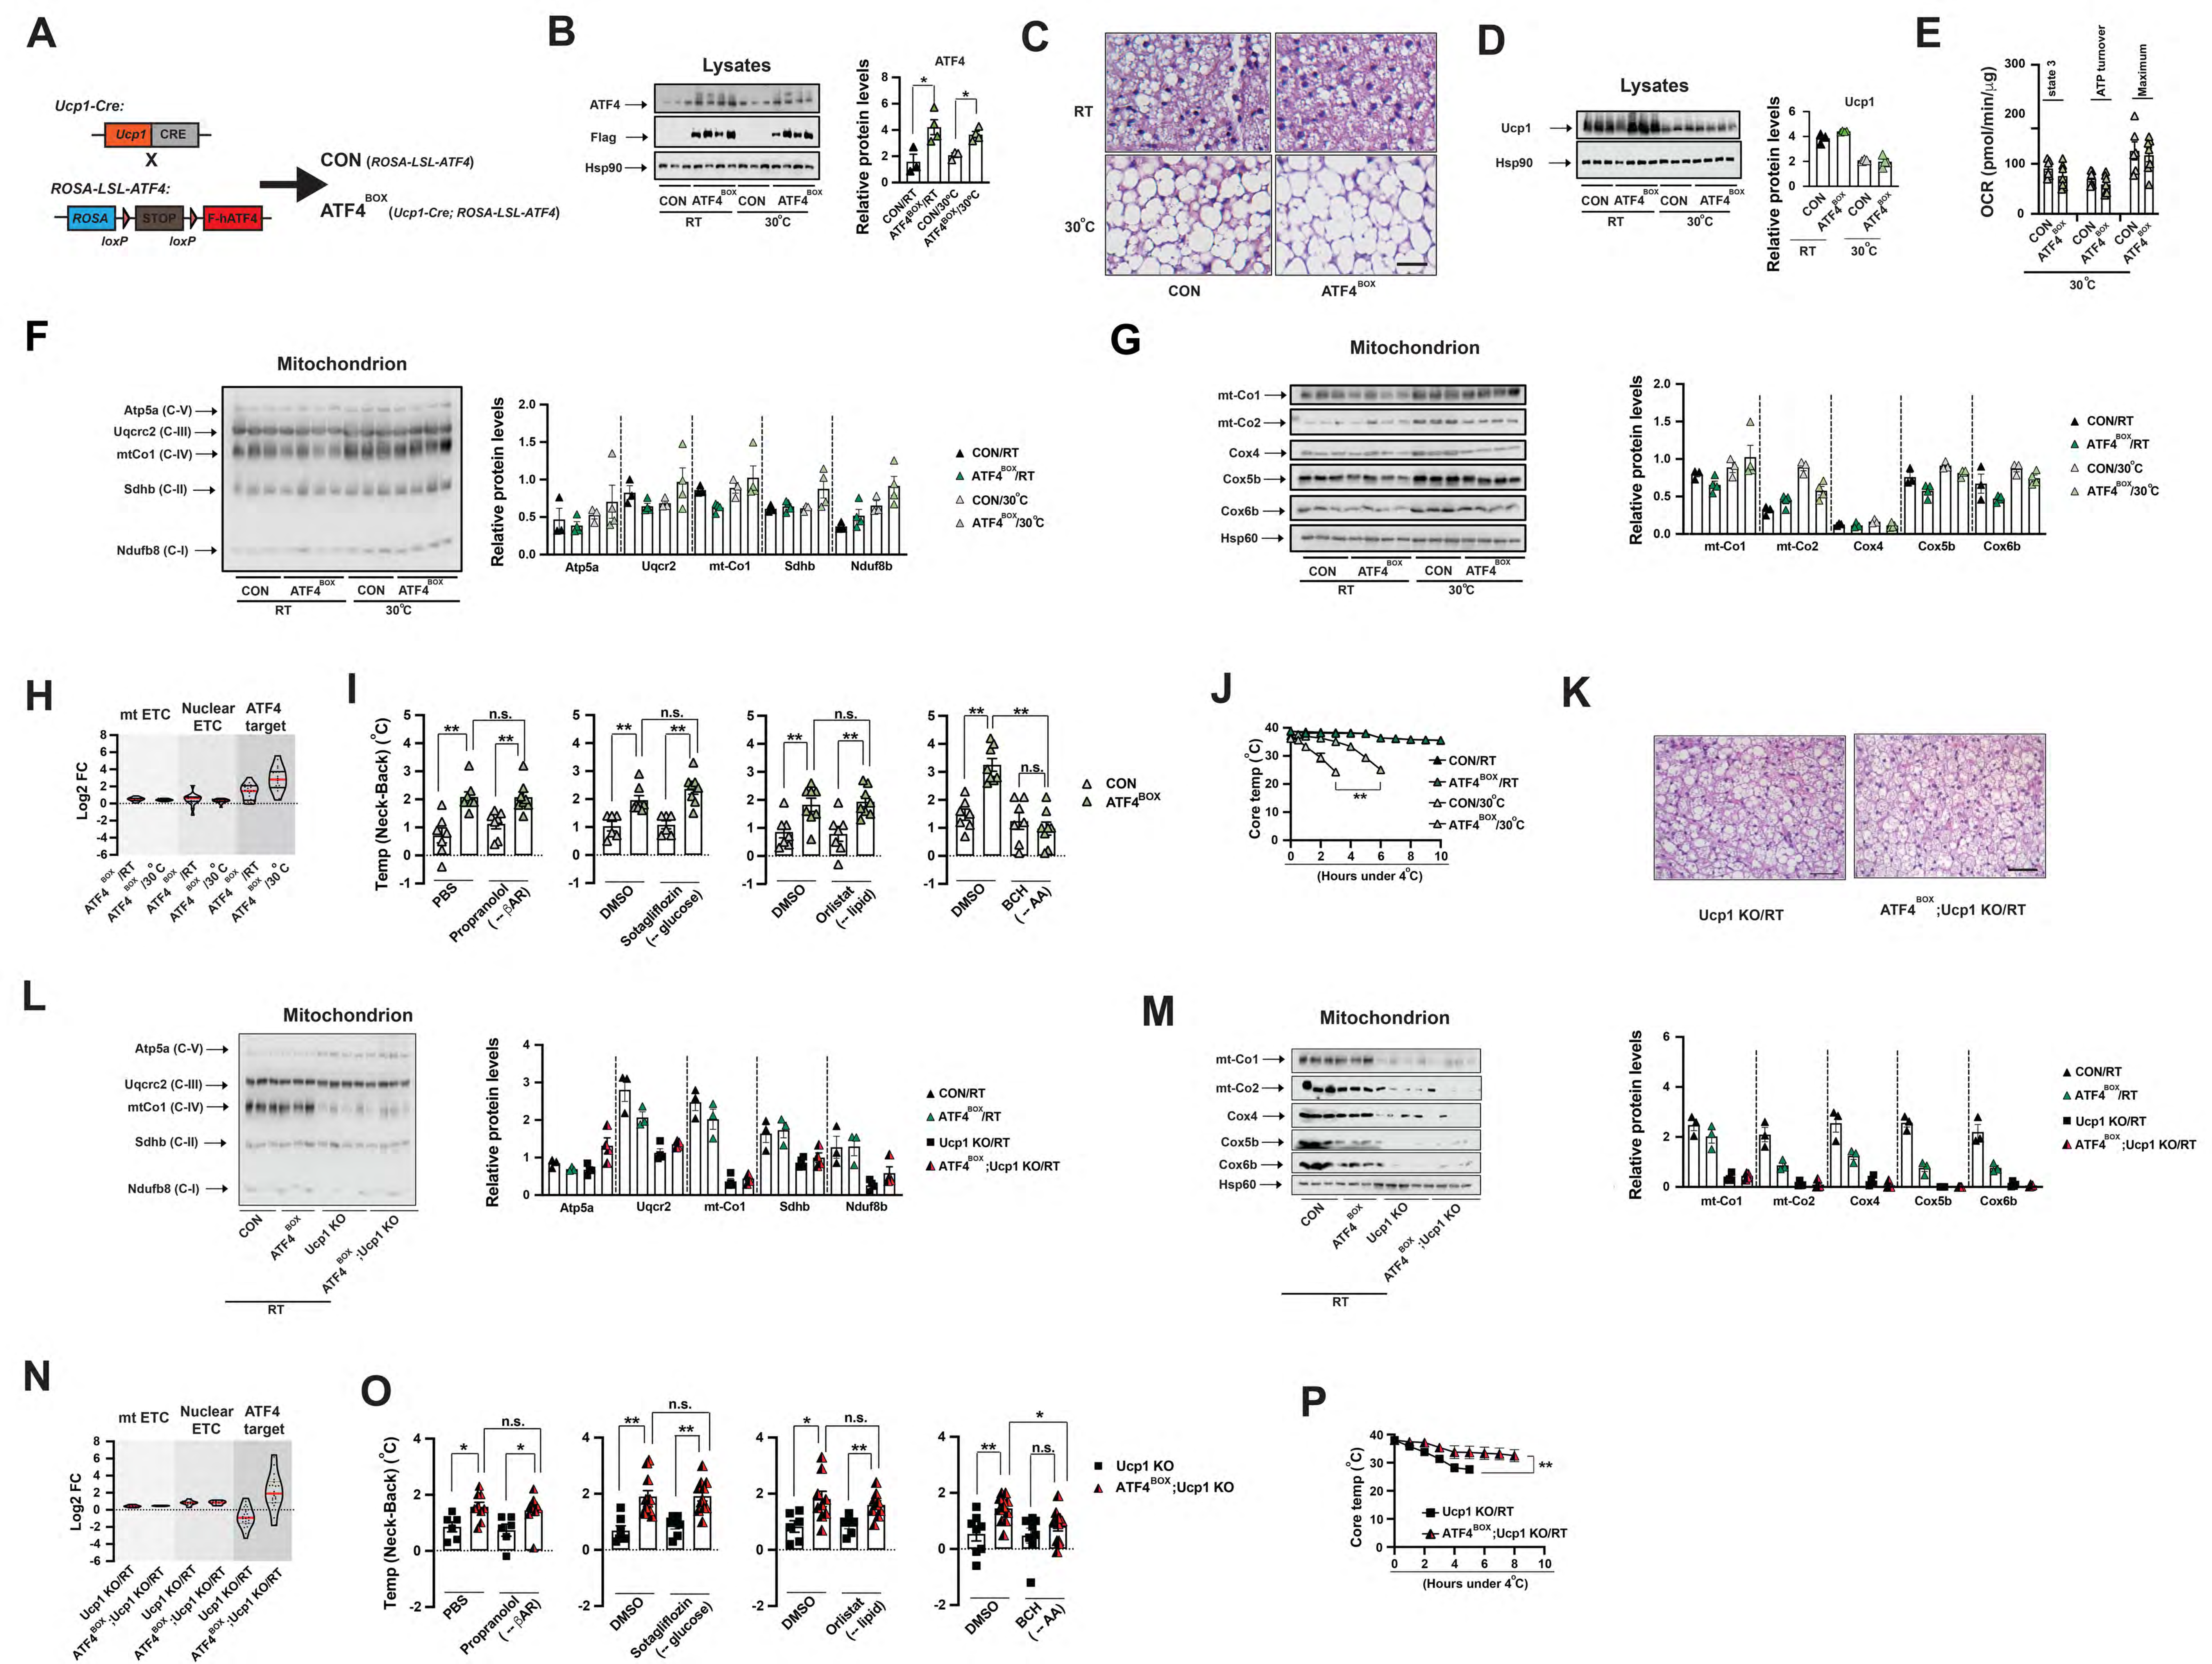

**Figure 3**

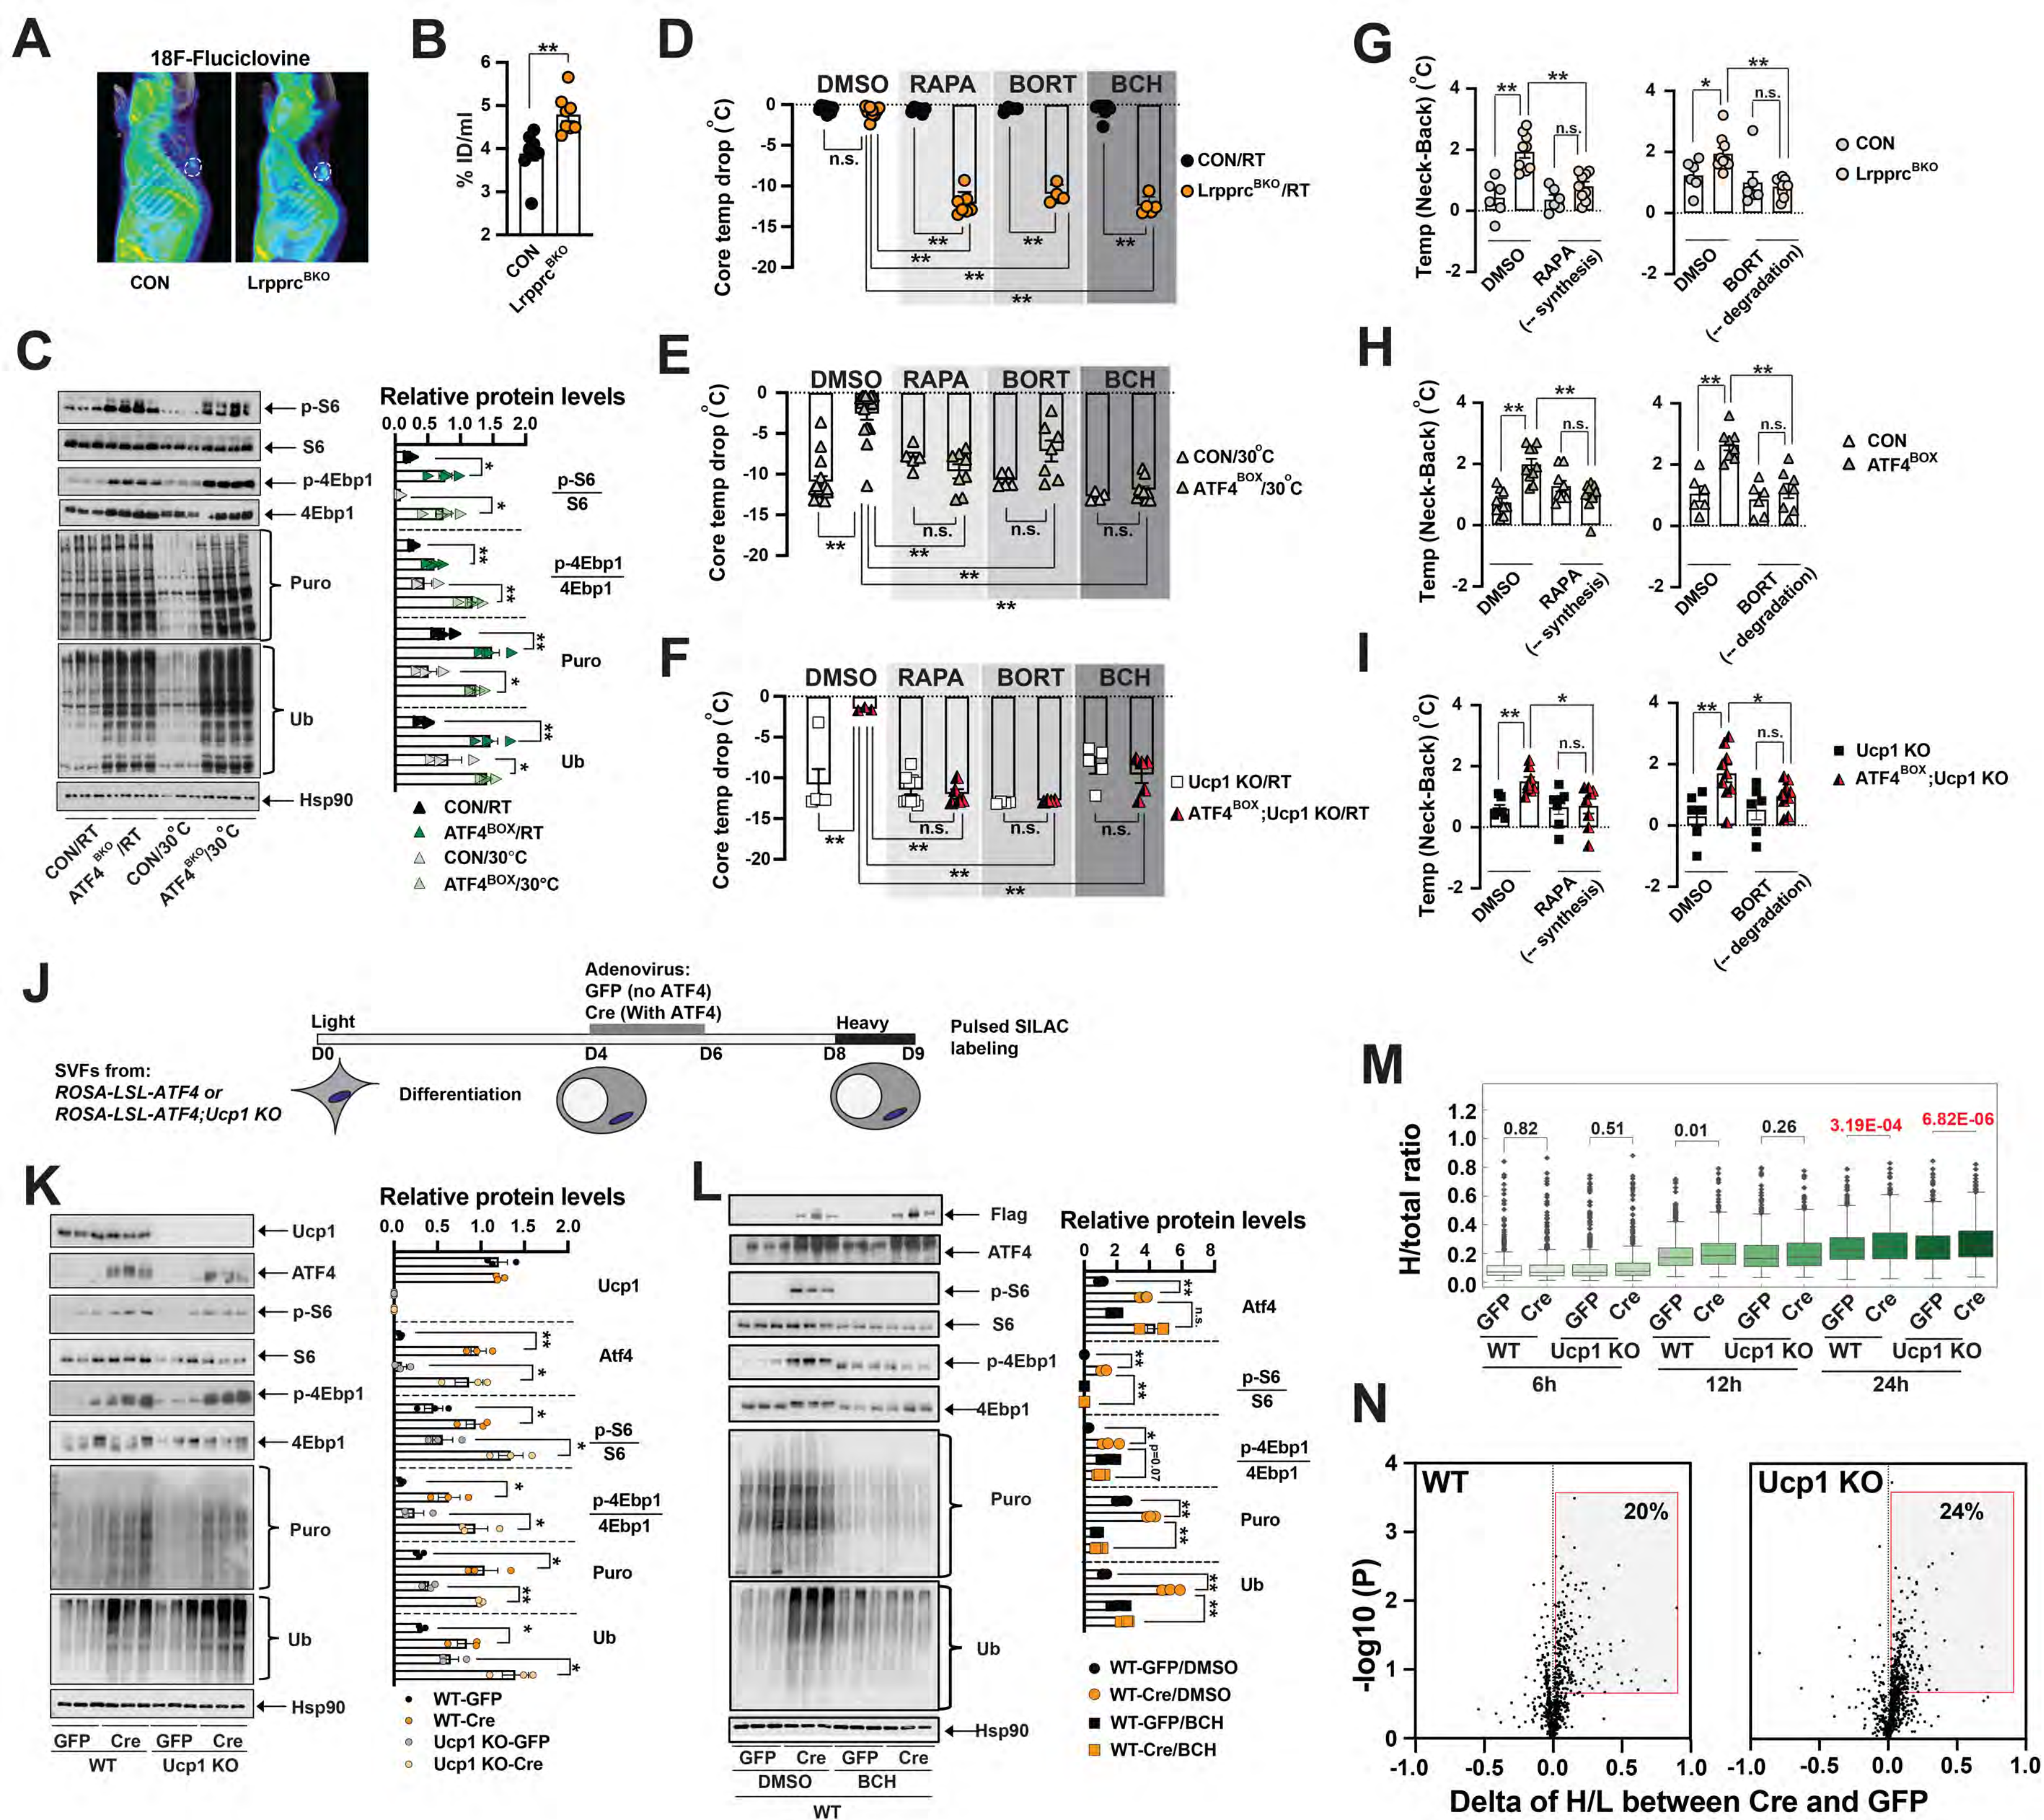

**Figure 4**

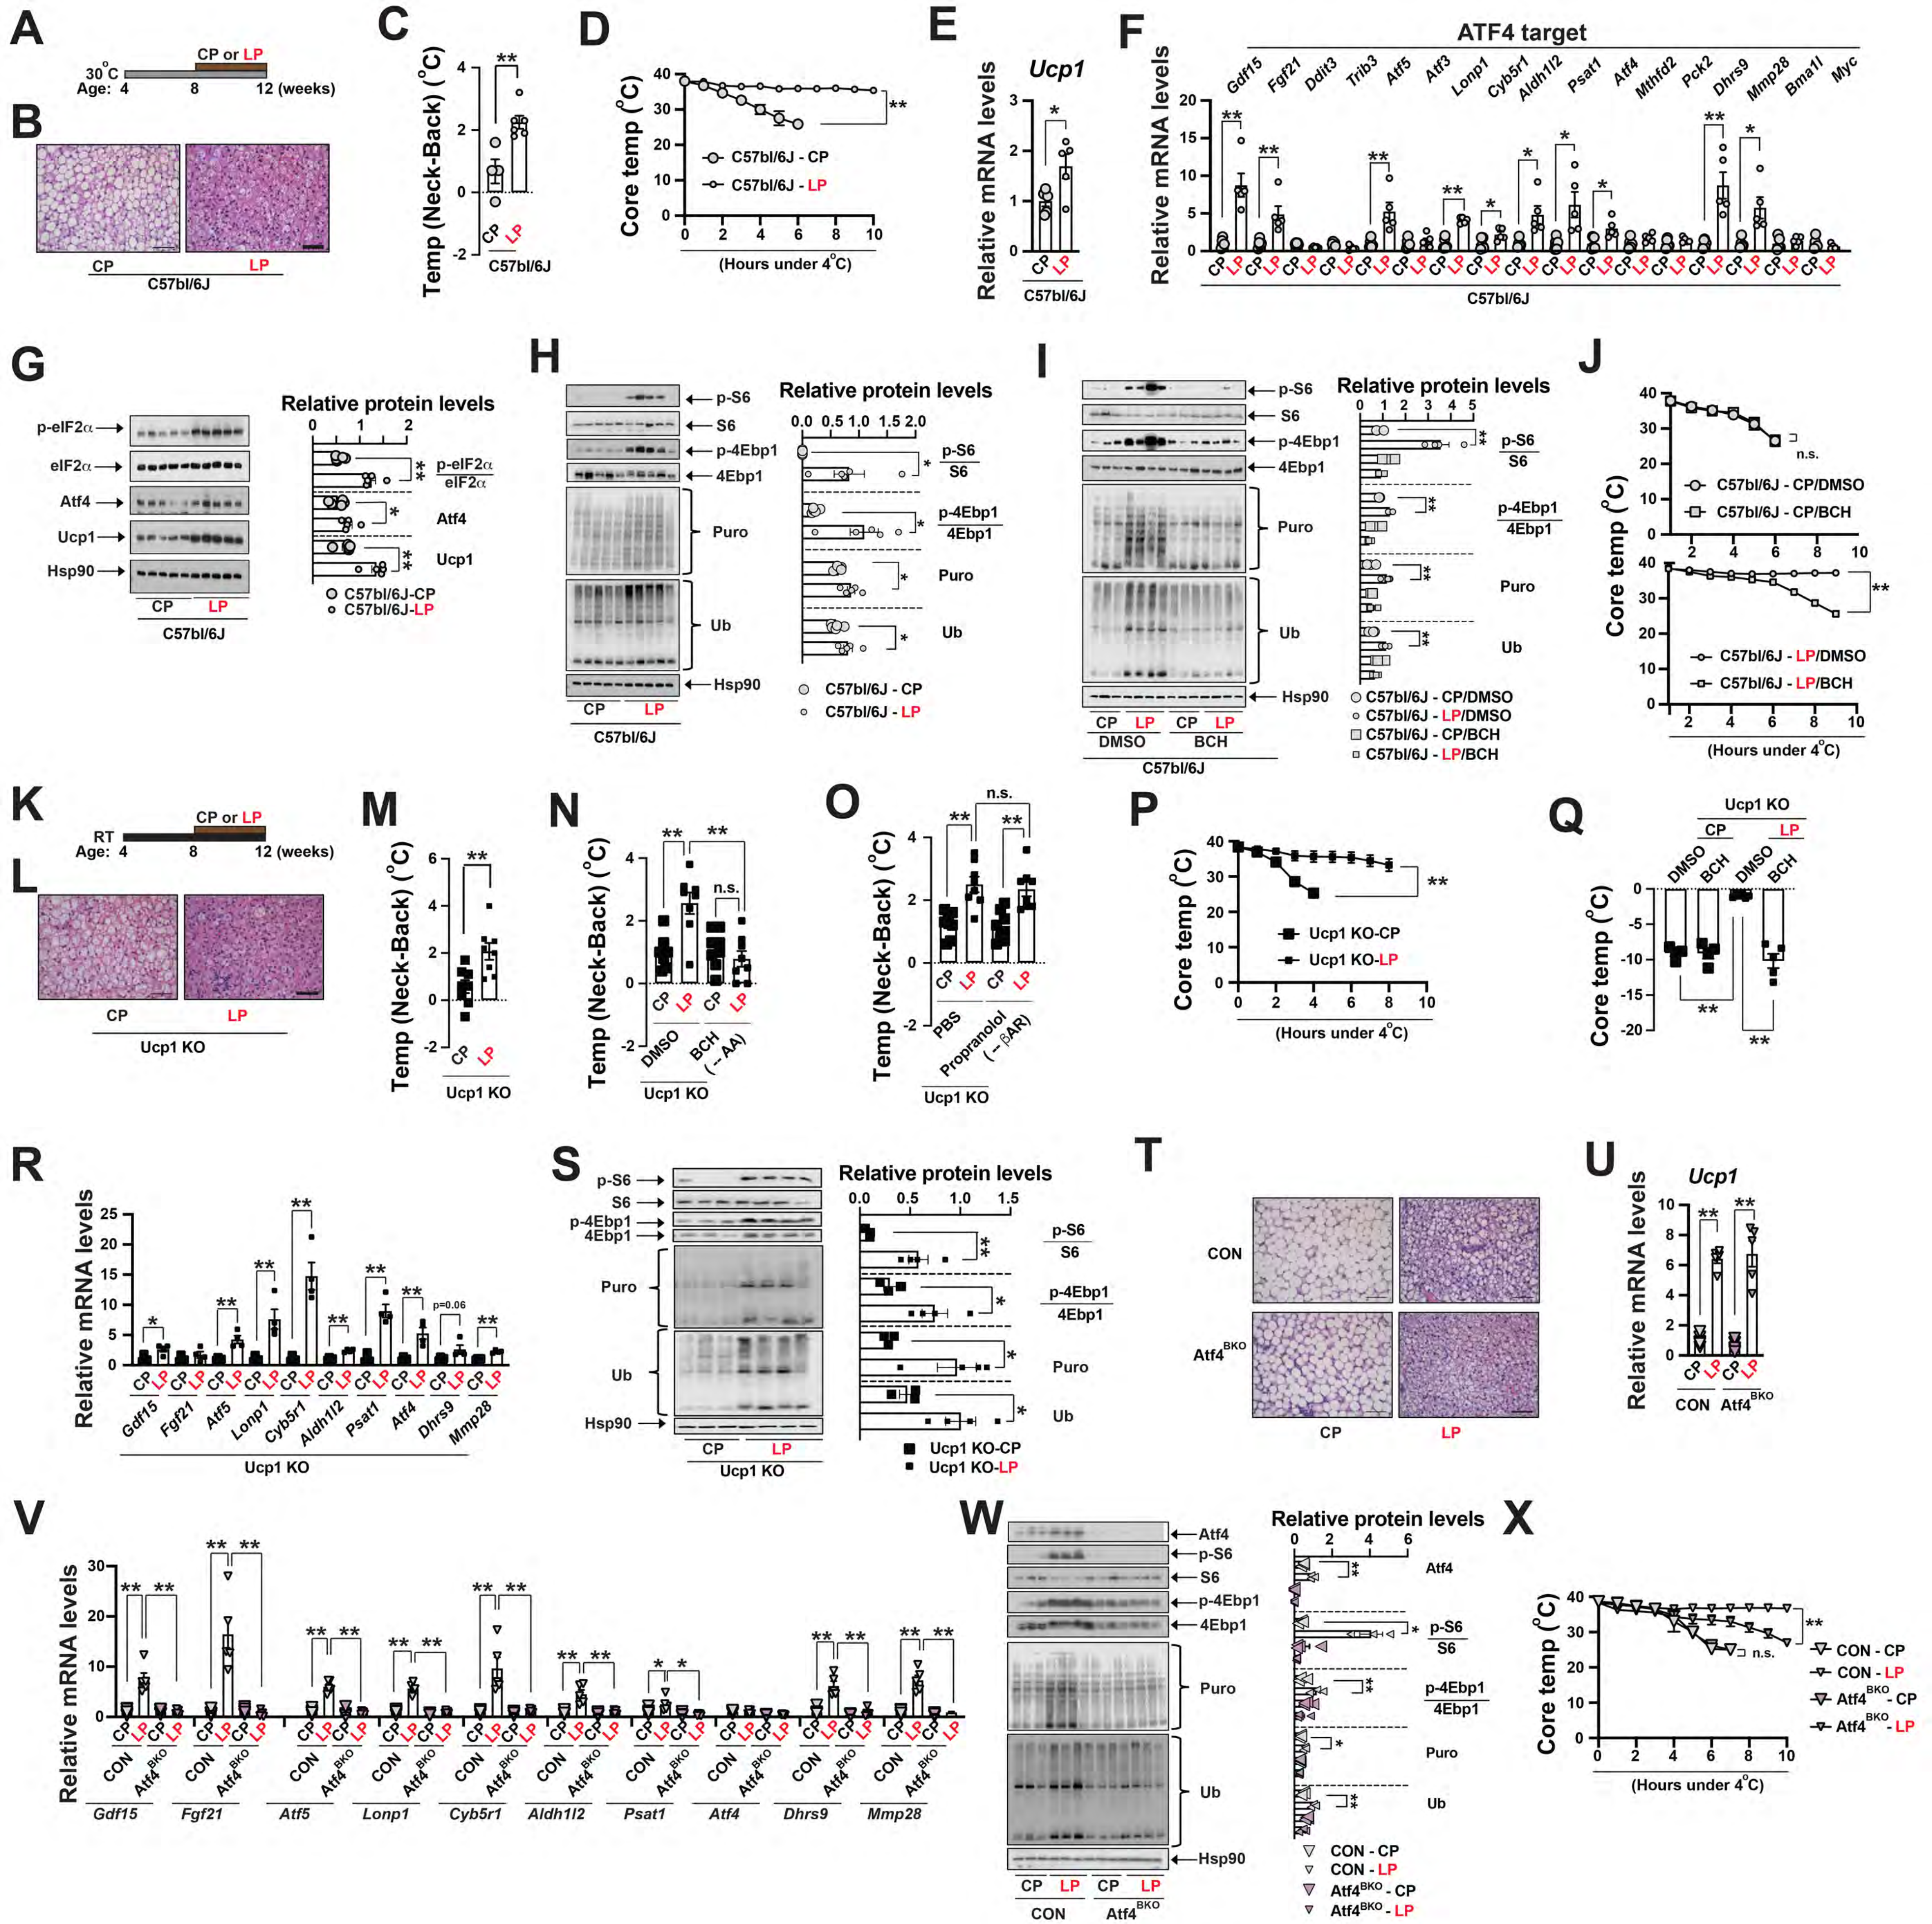

**Figure 5**

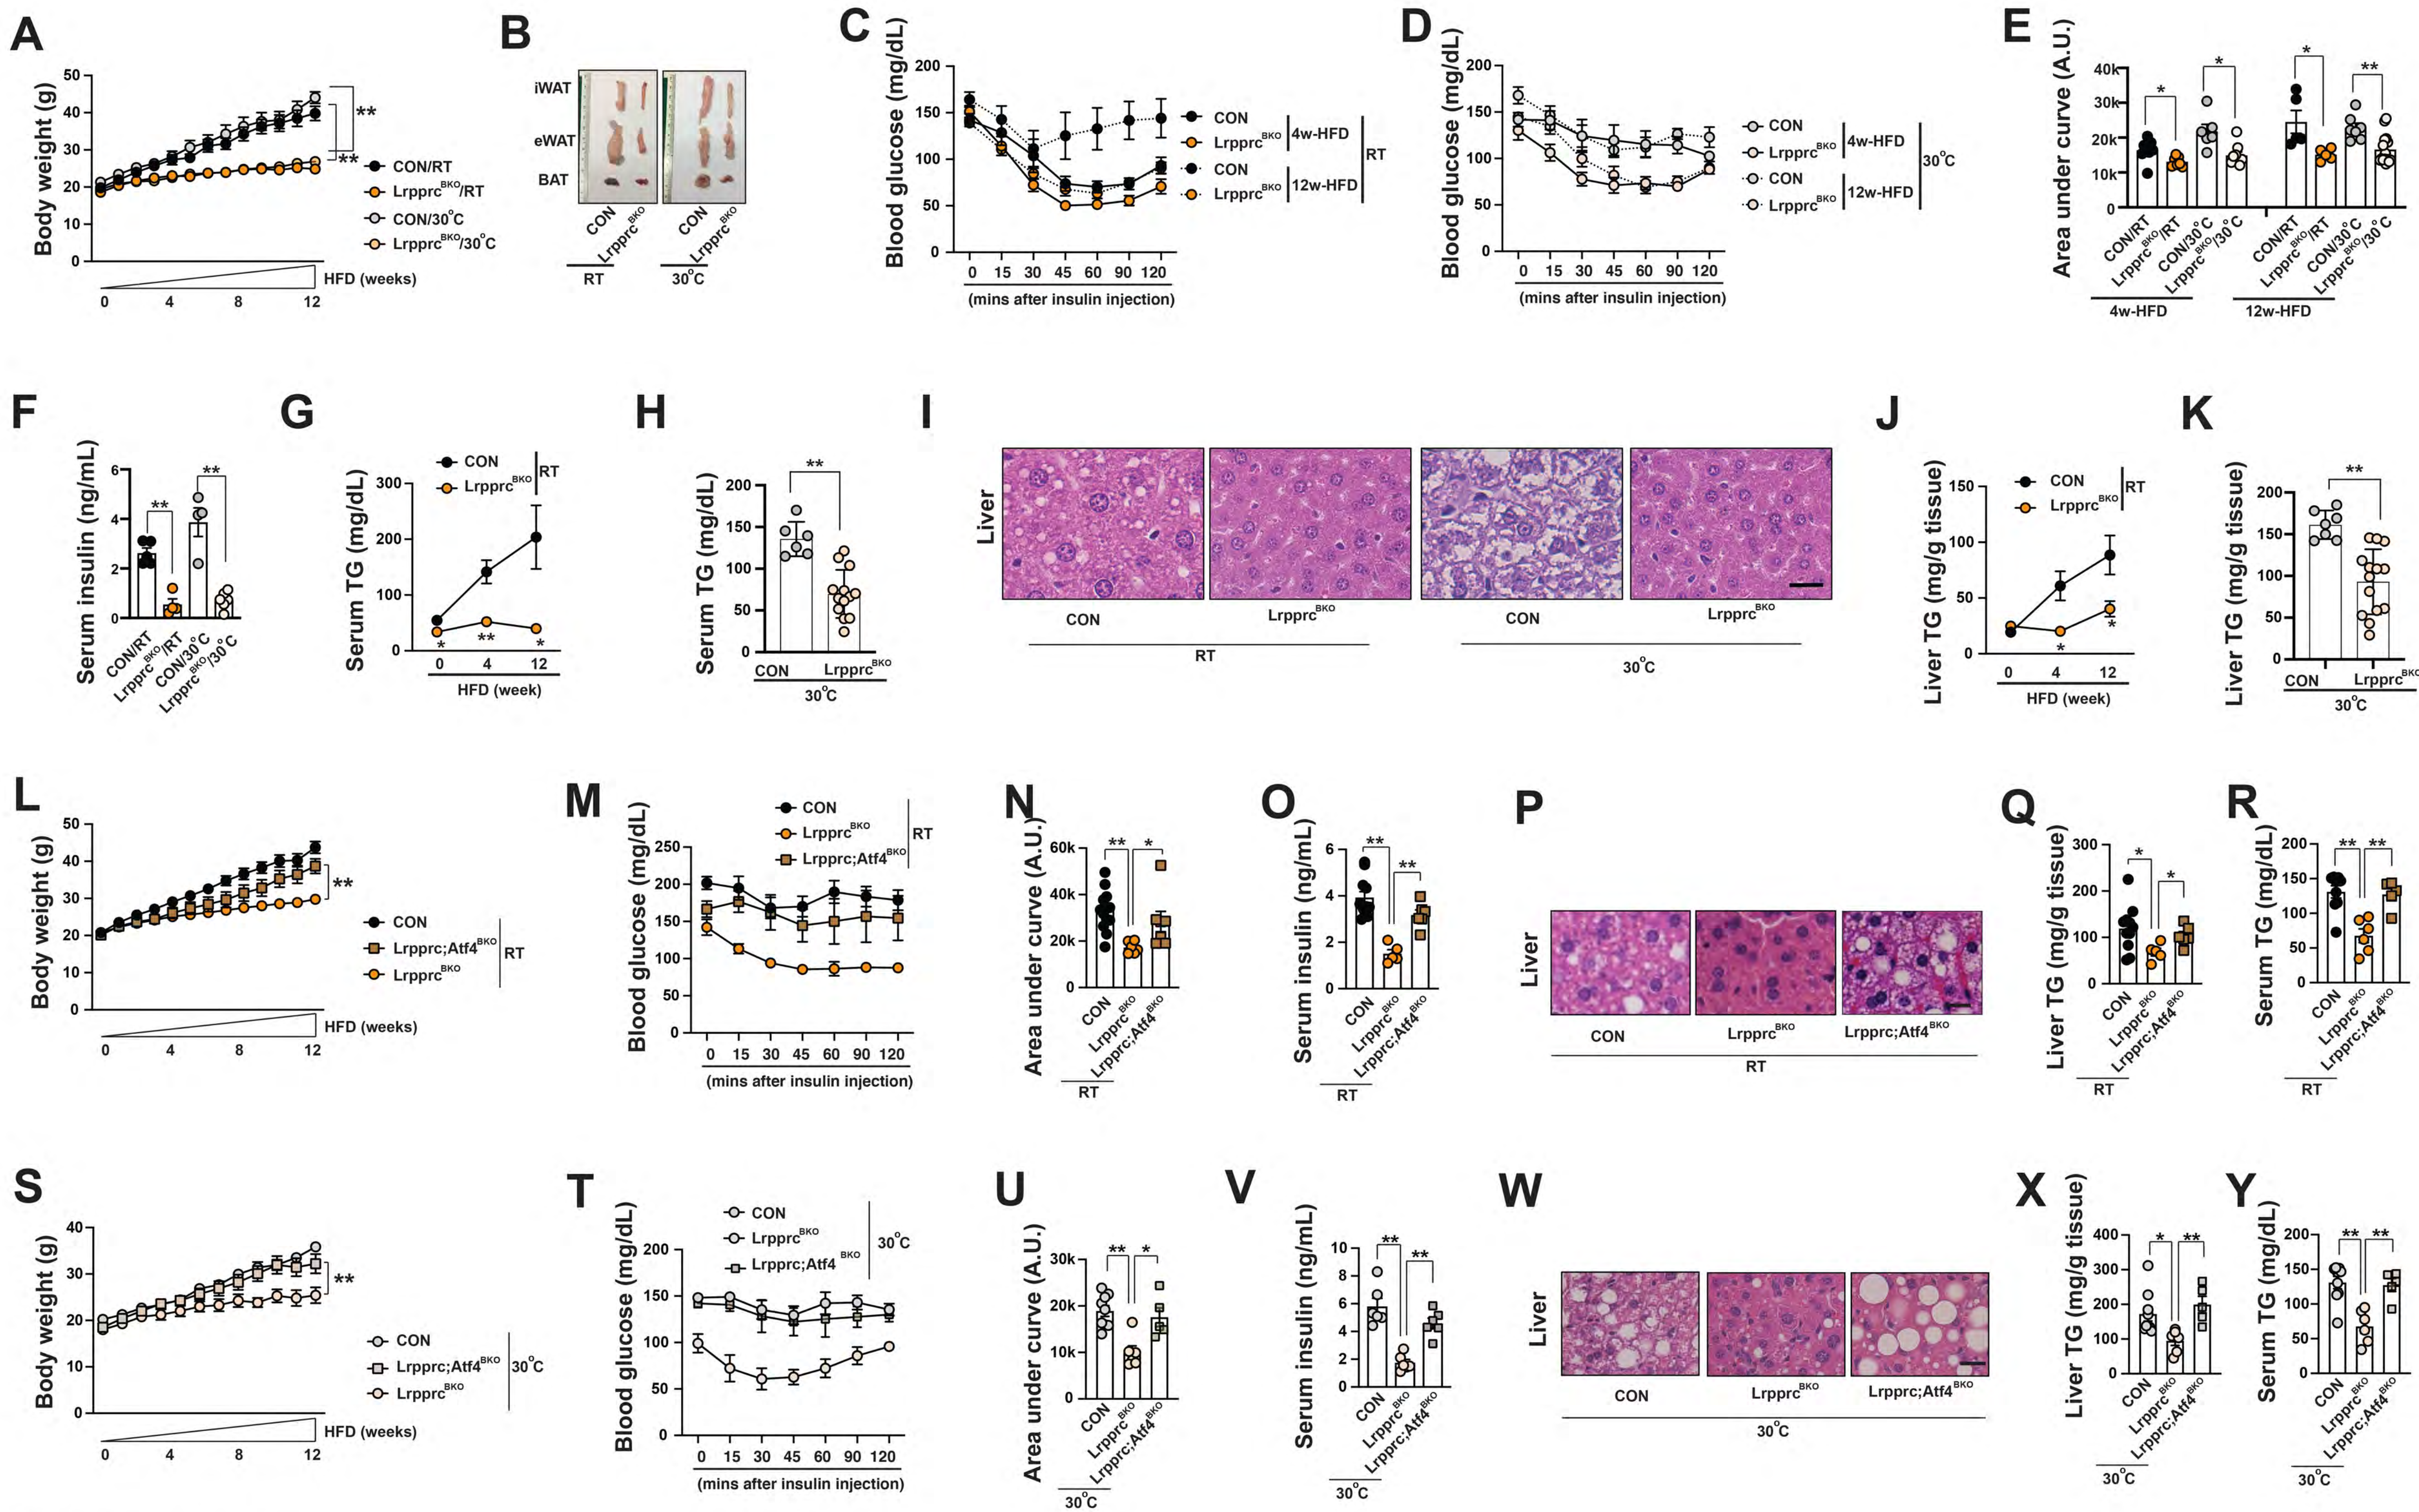

**Figure 6**

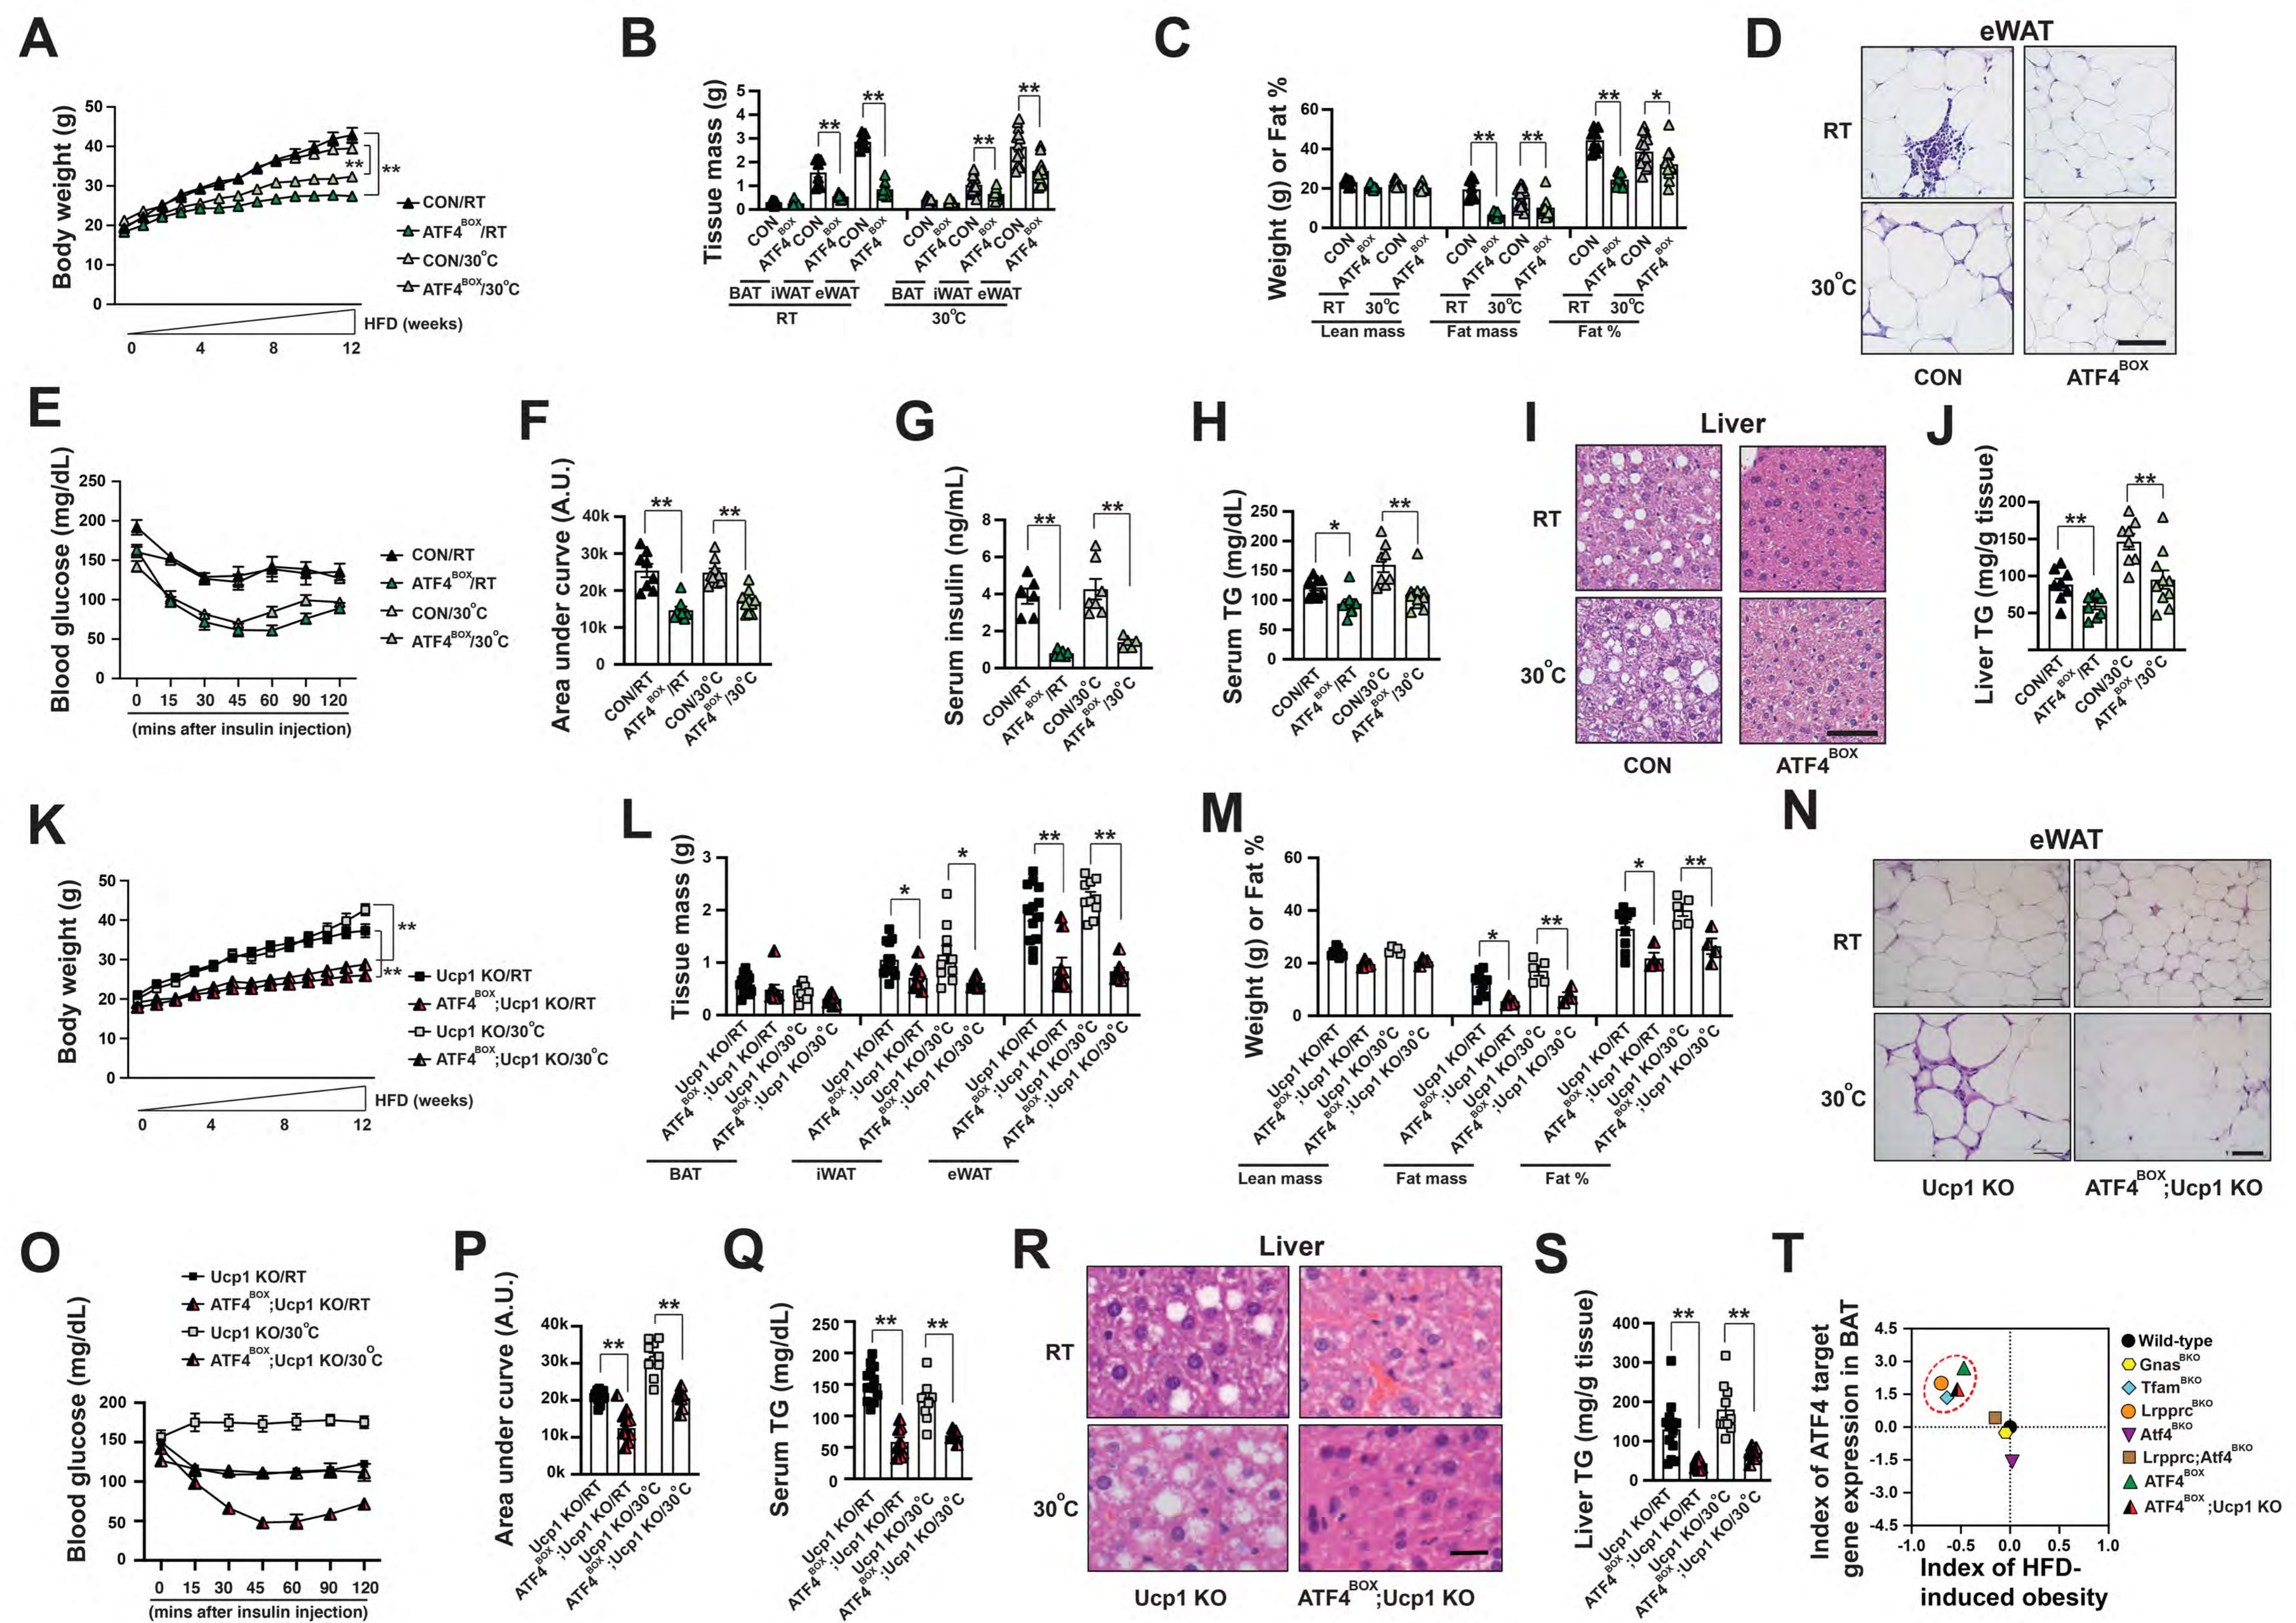

**Figure 7**

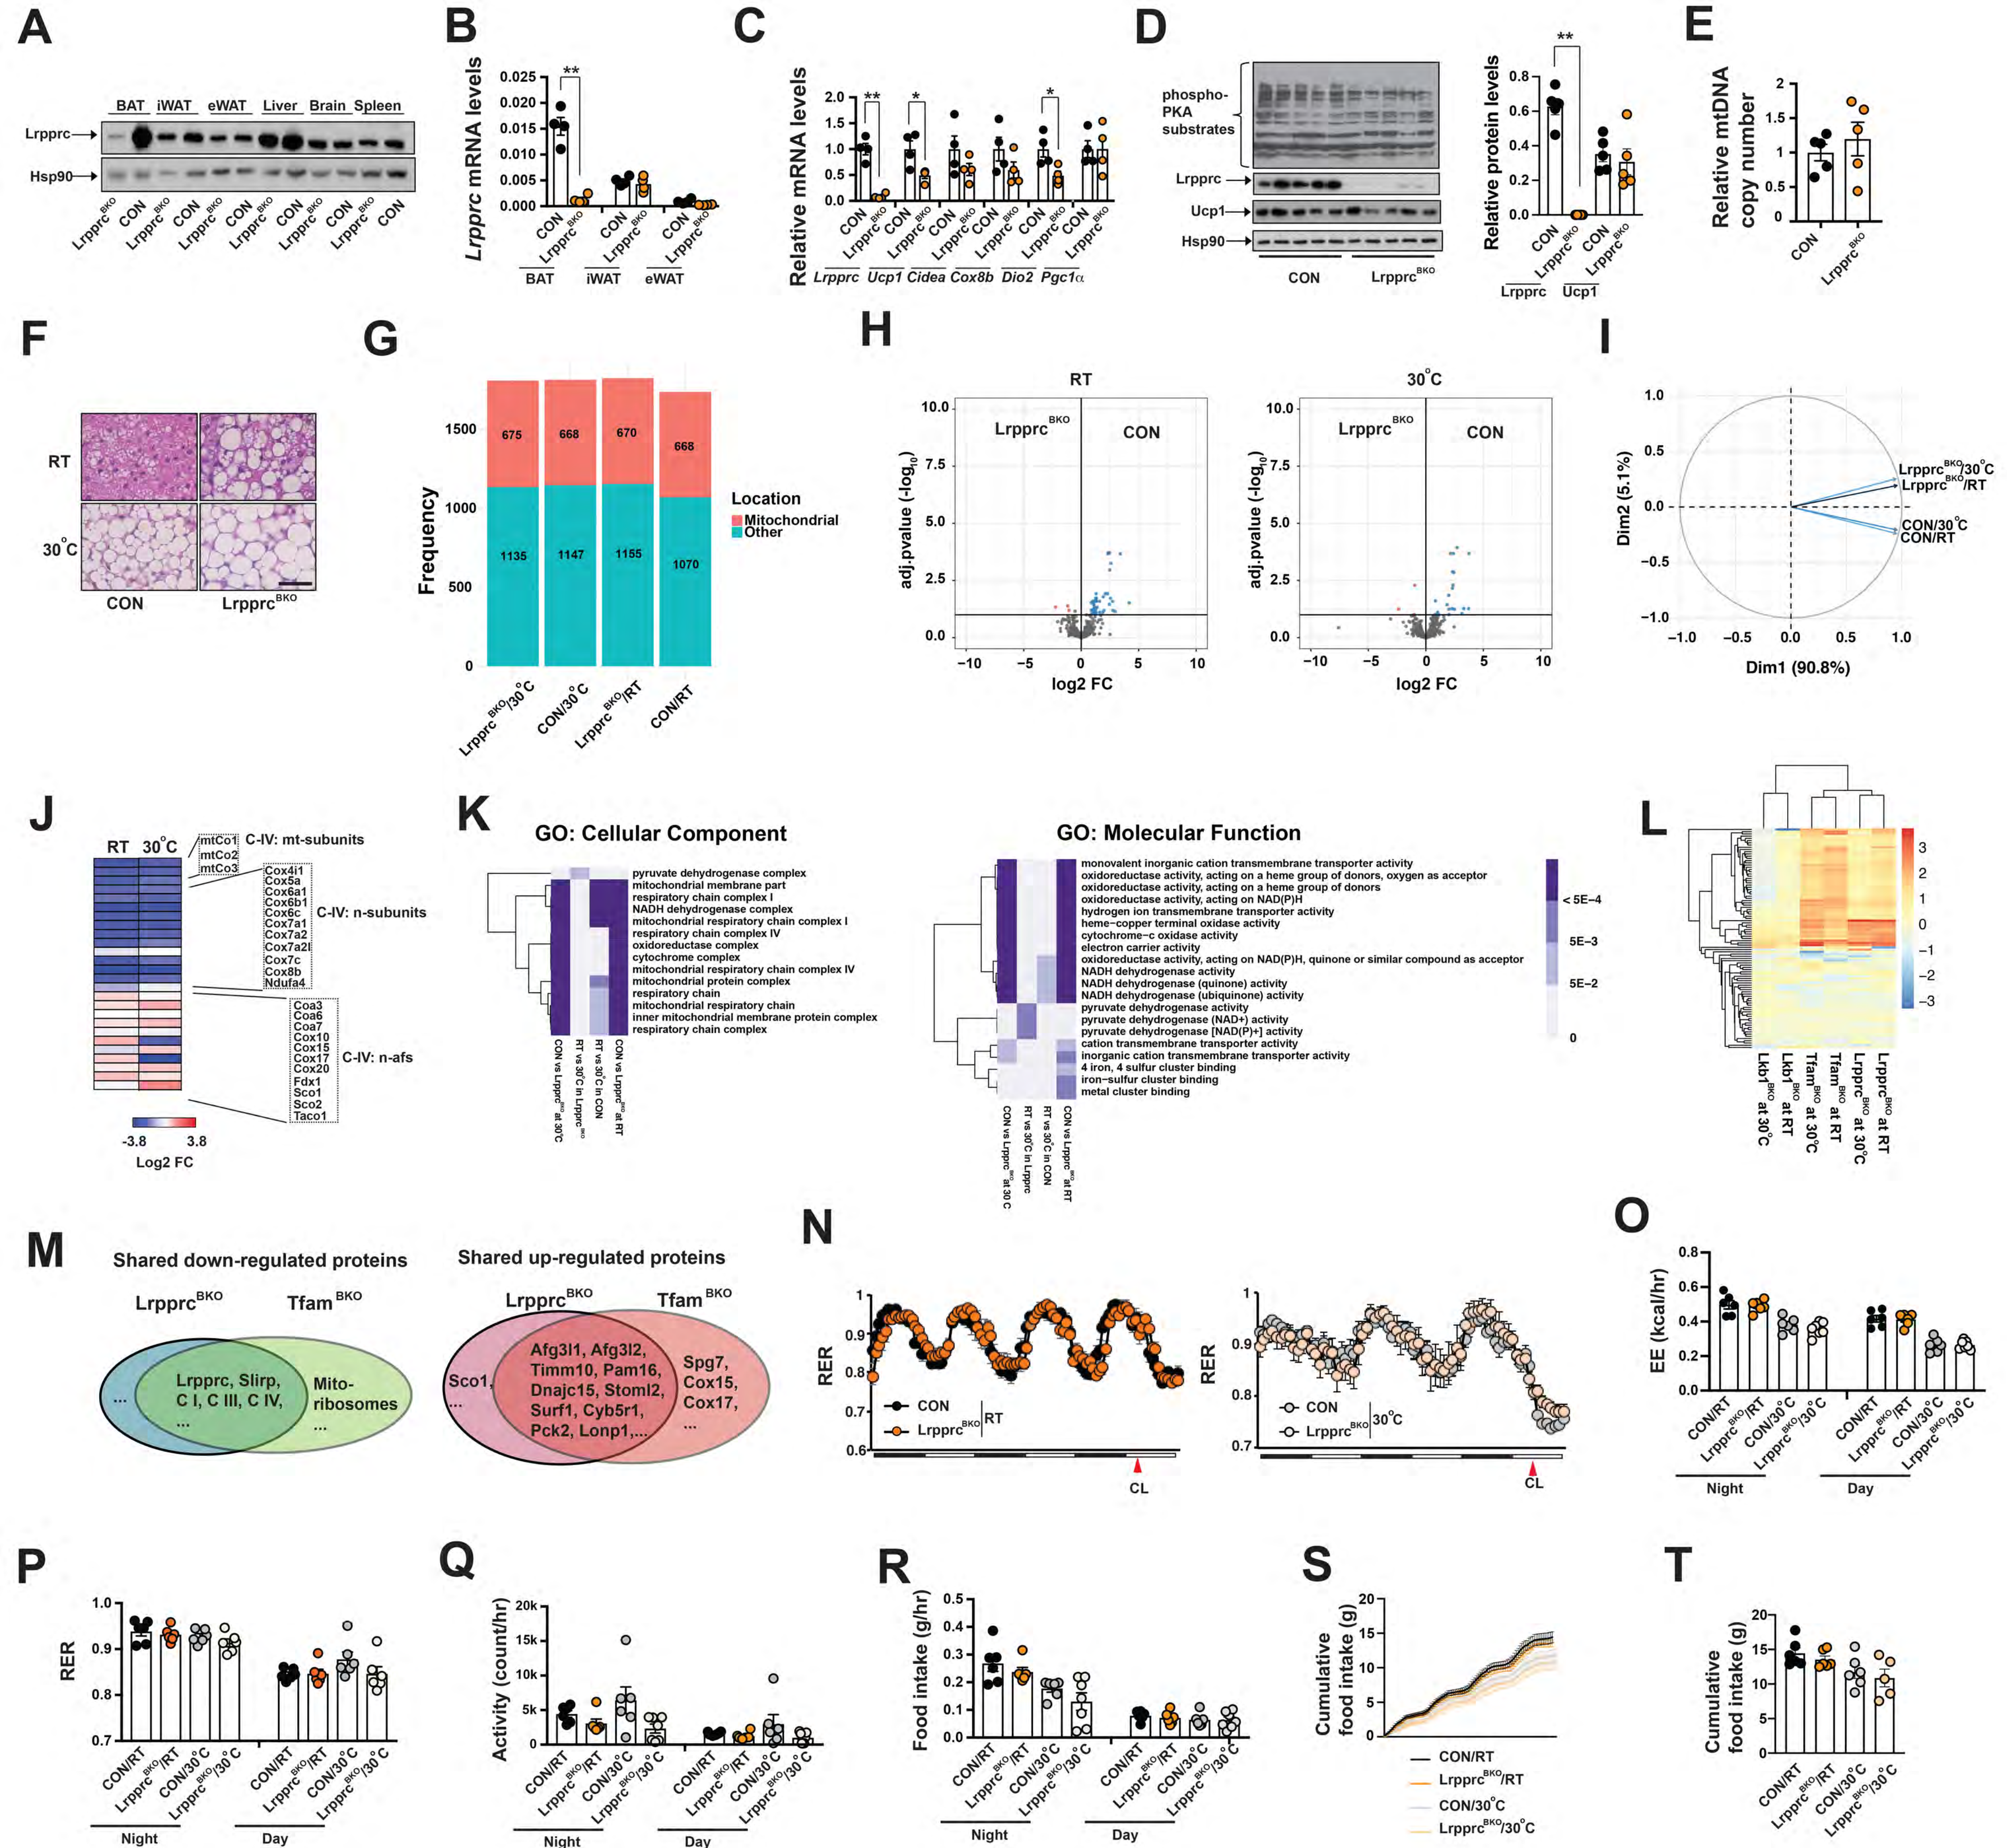

**Supplementary Figure 1**

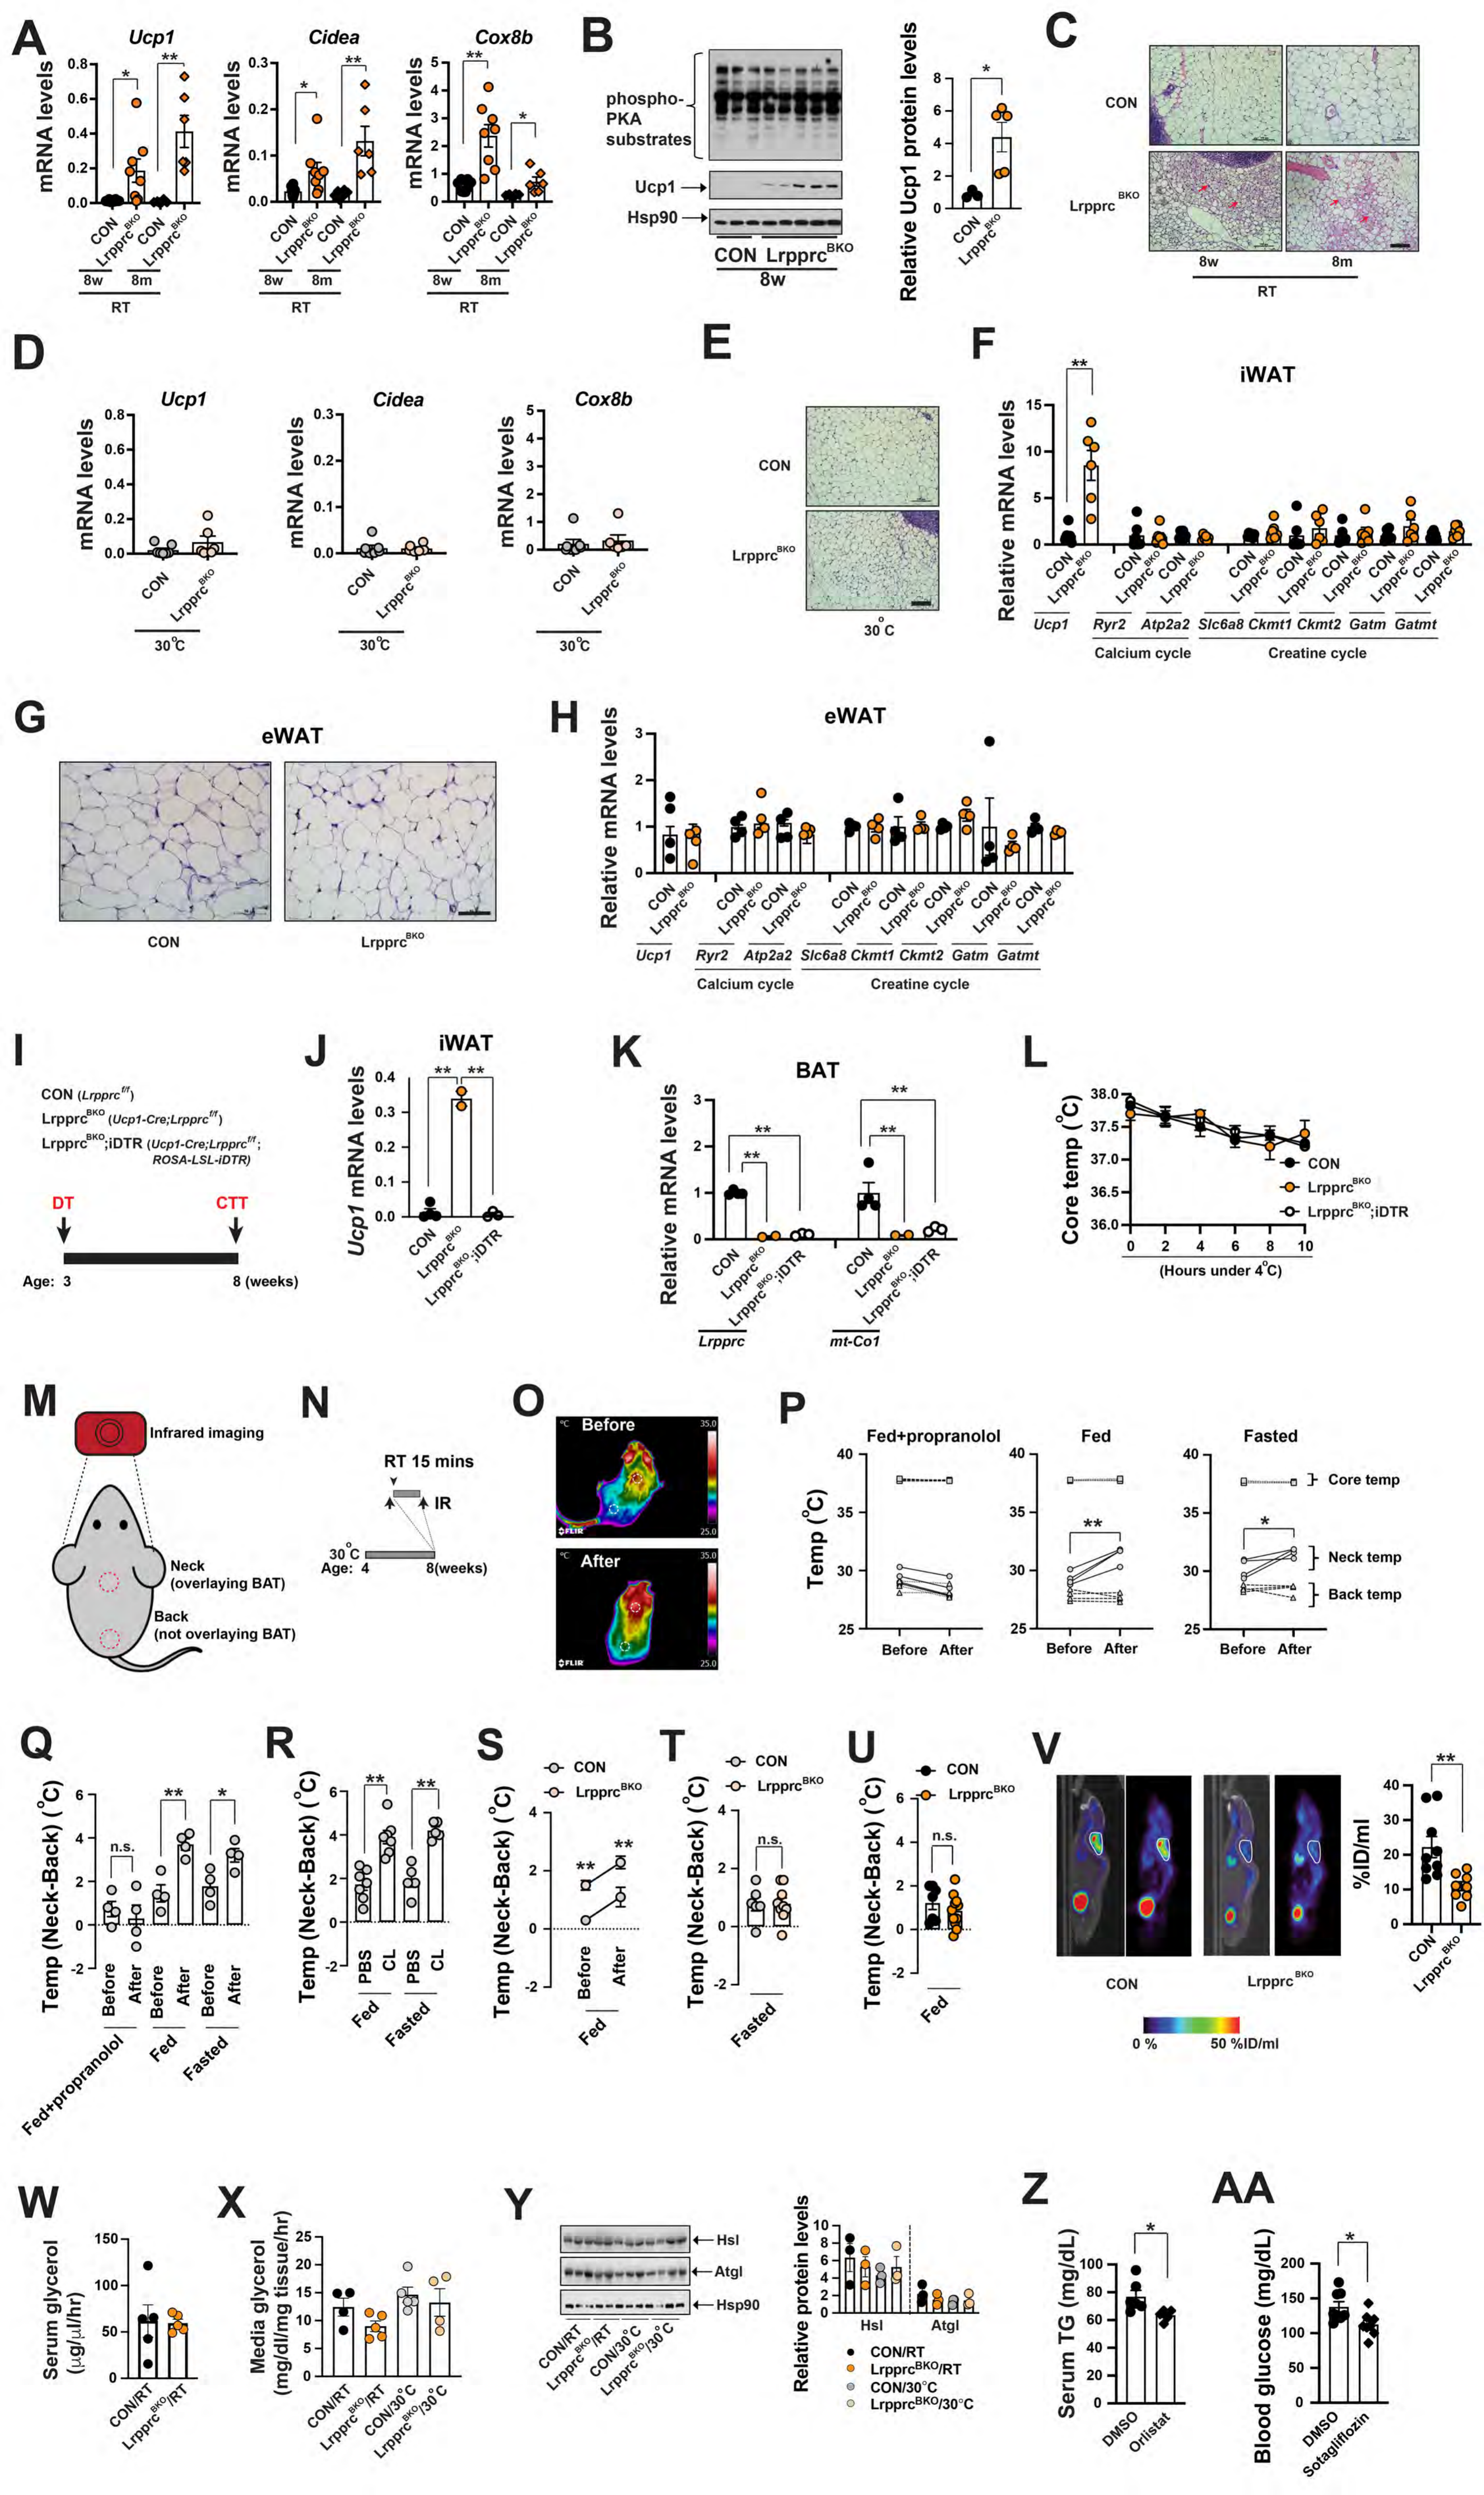

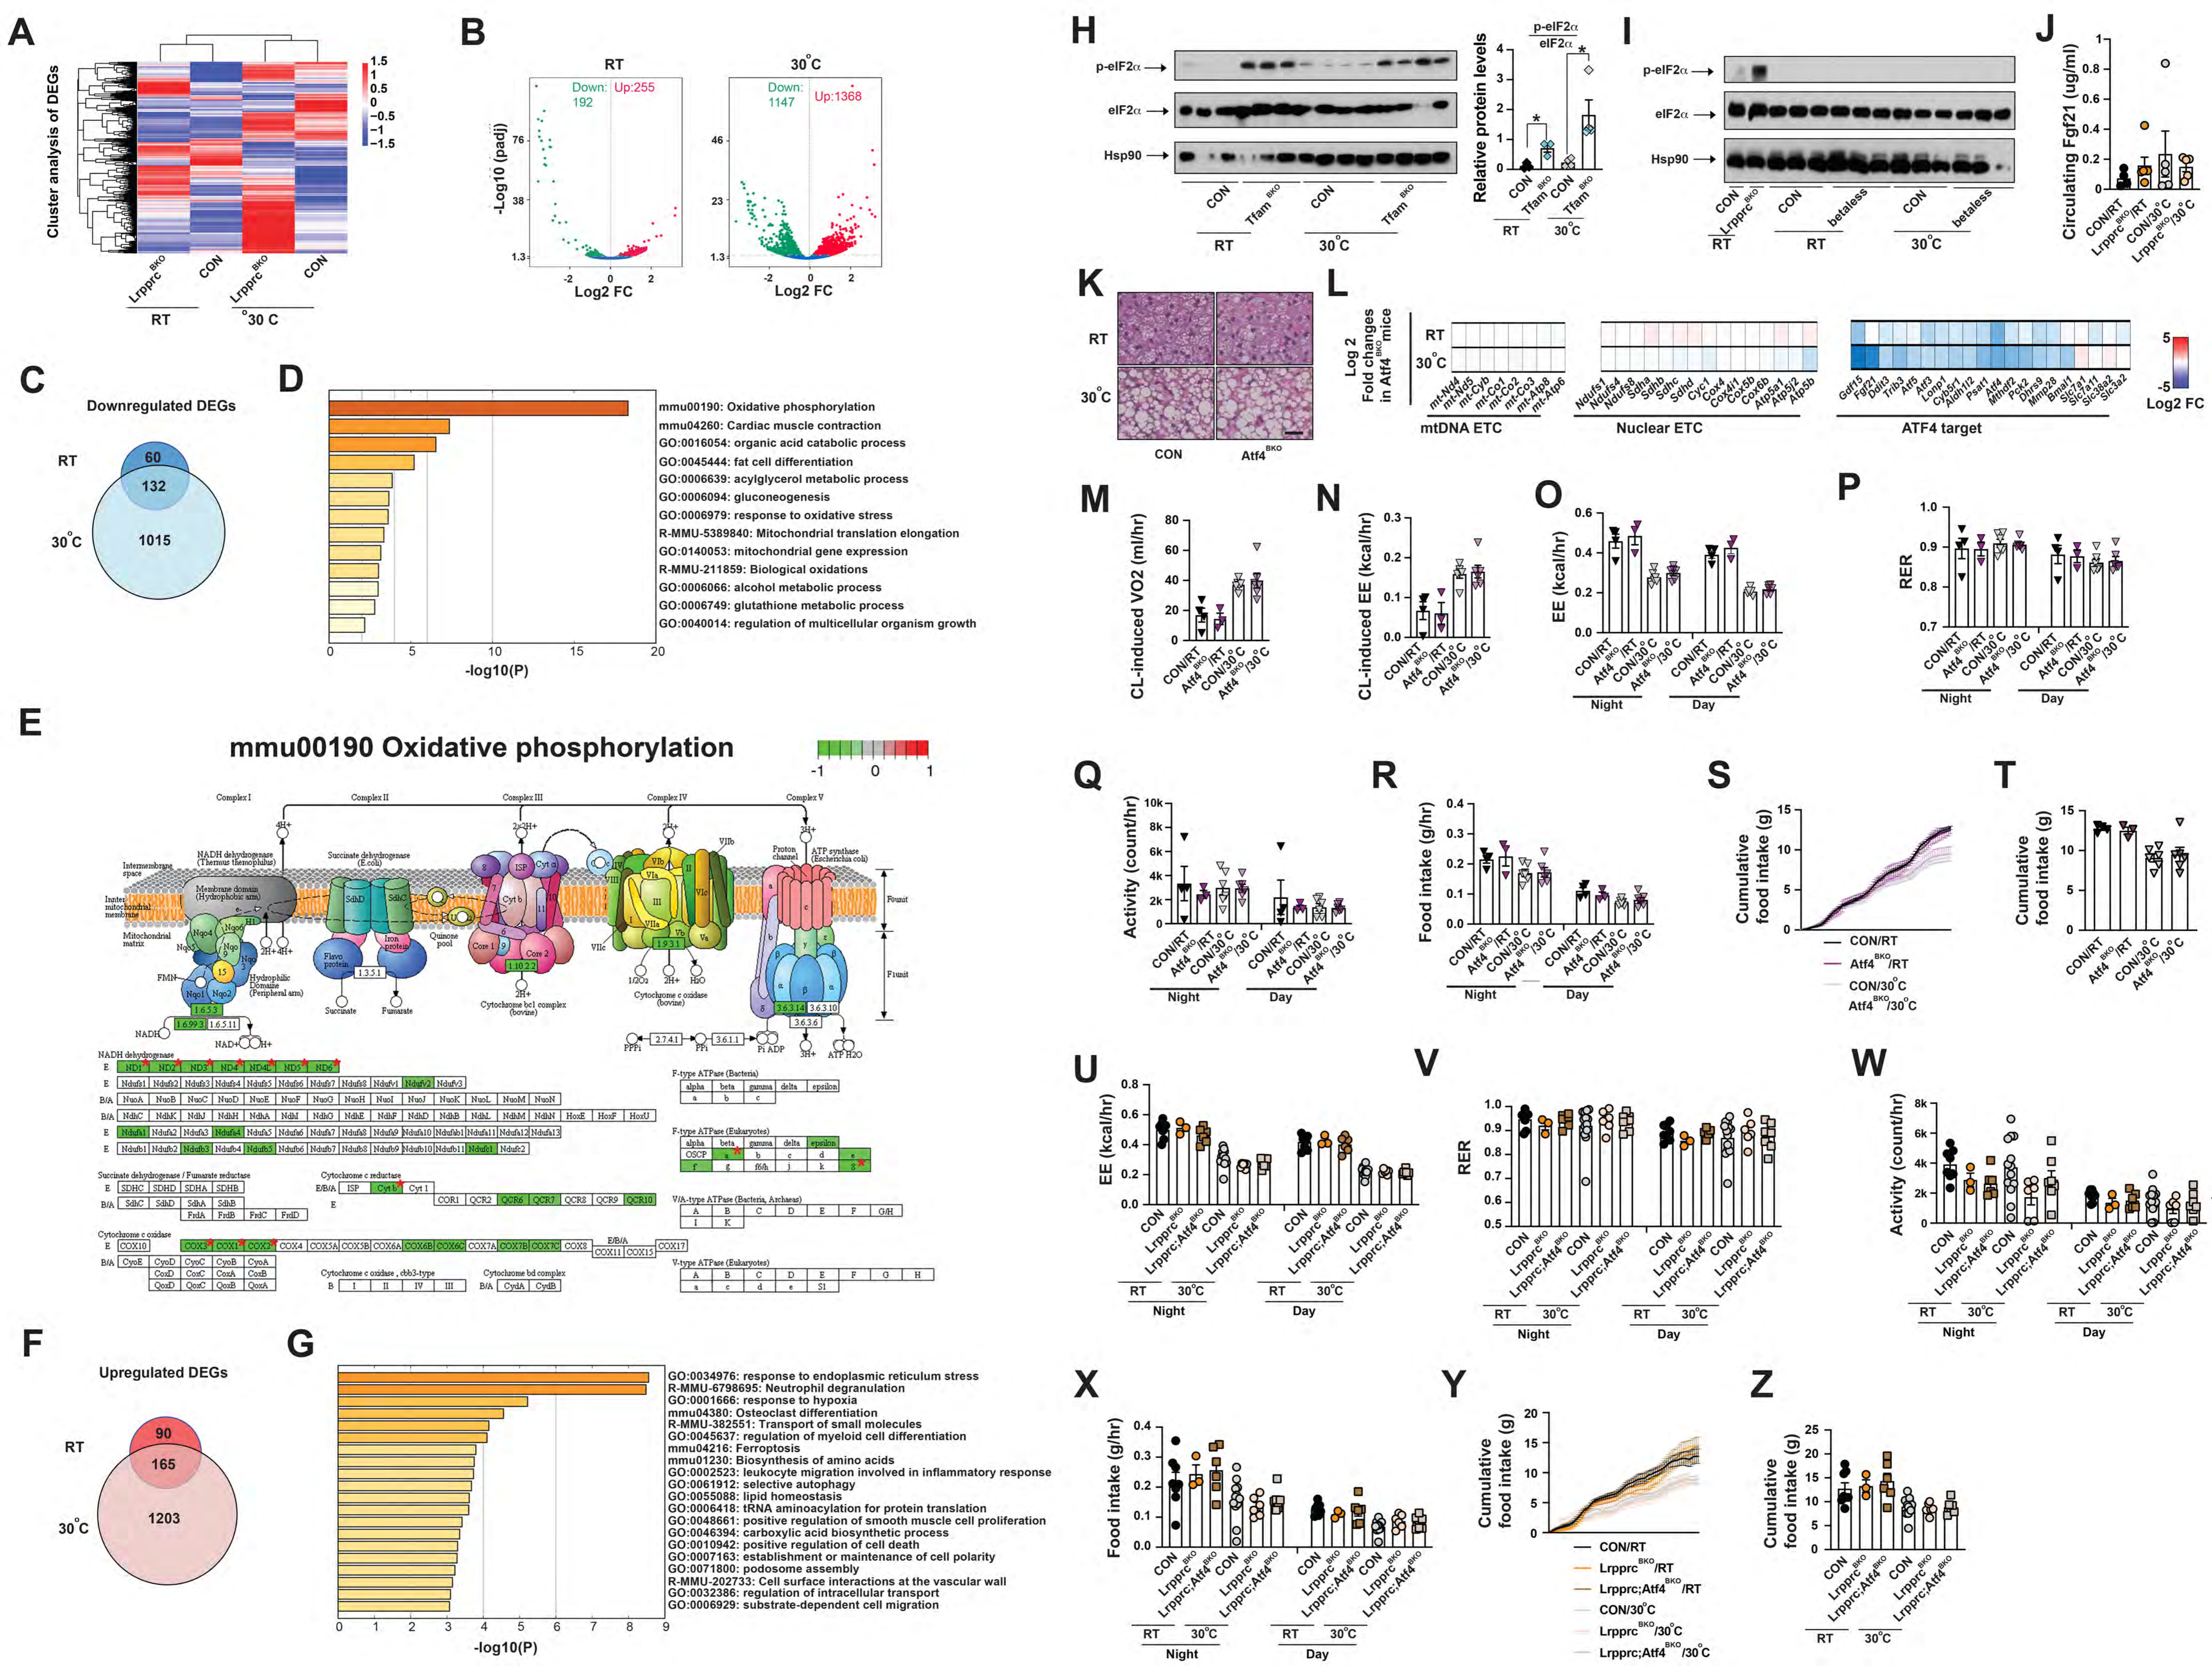

Supplementary Figure 3



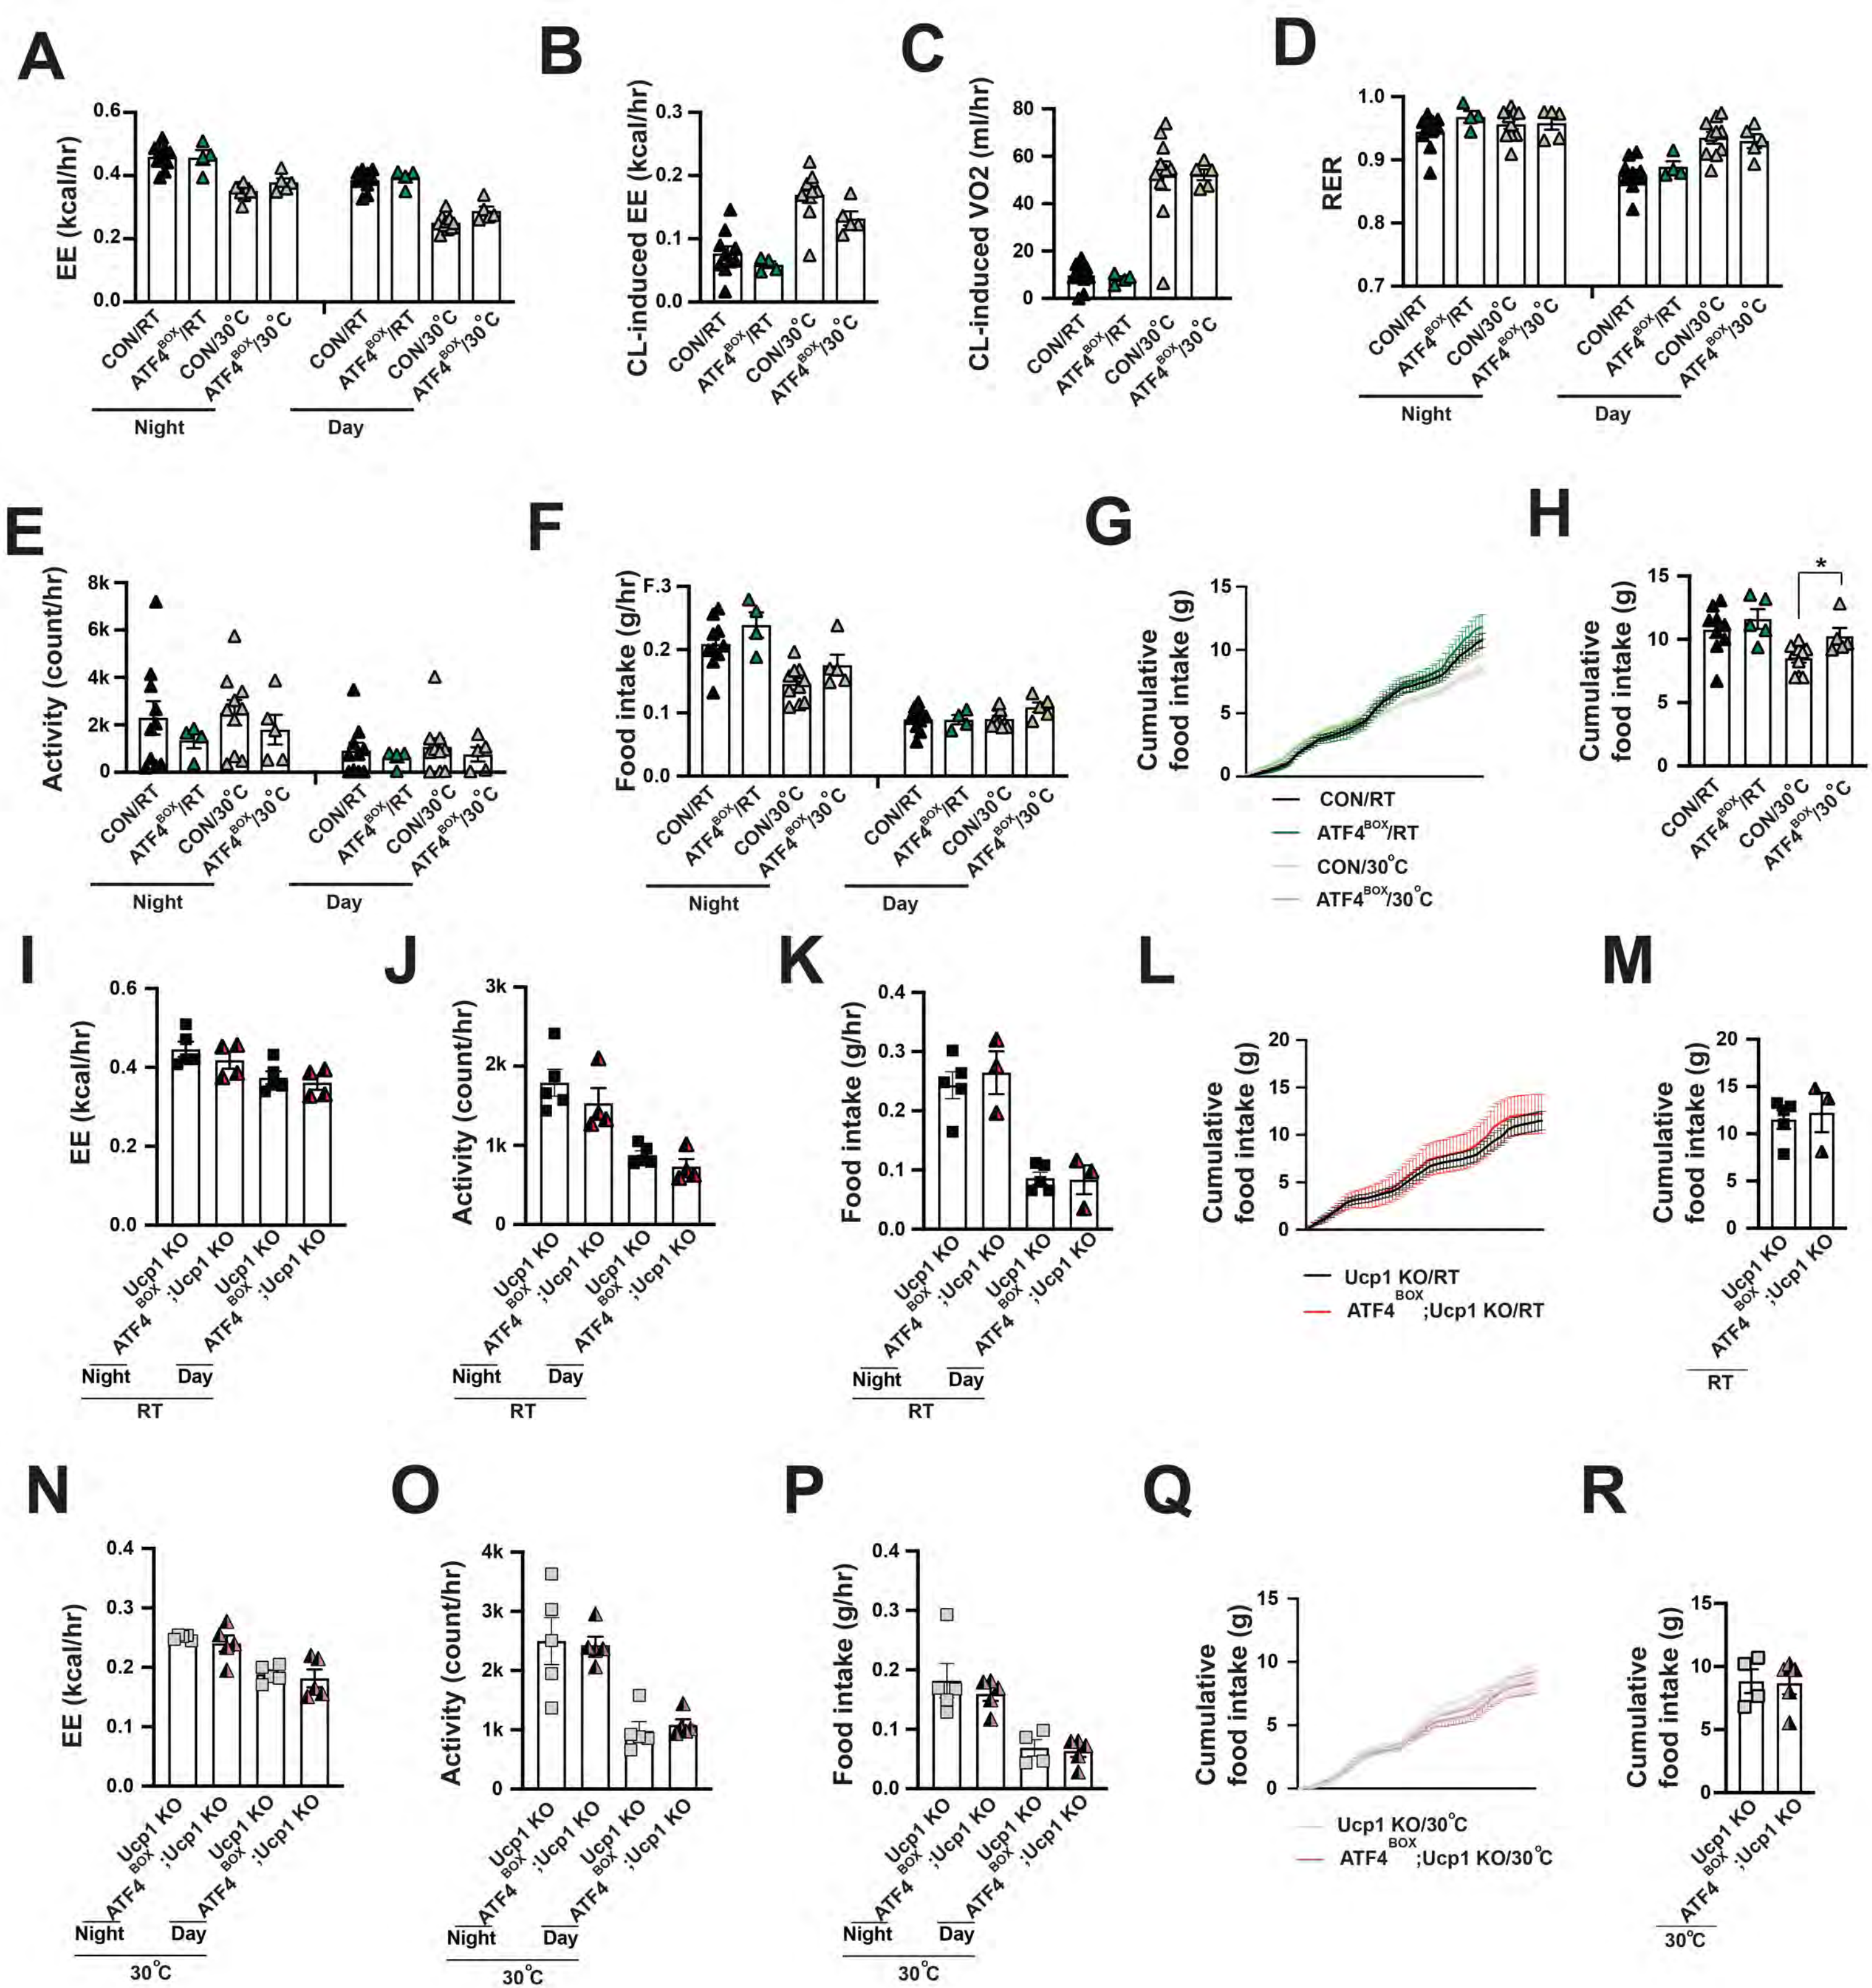

**Supplementary Figure 4**

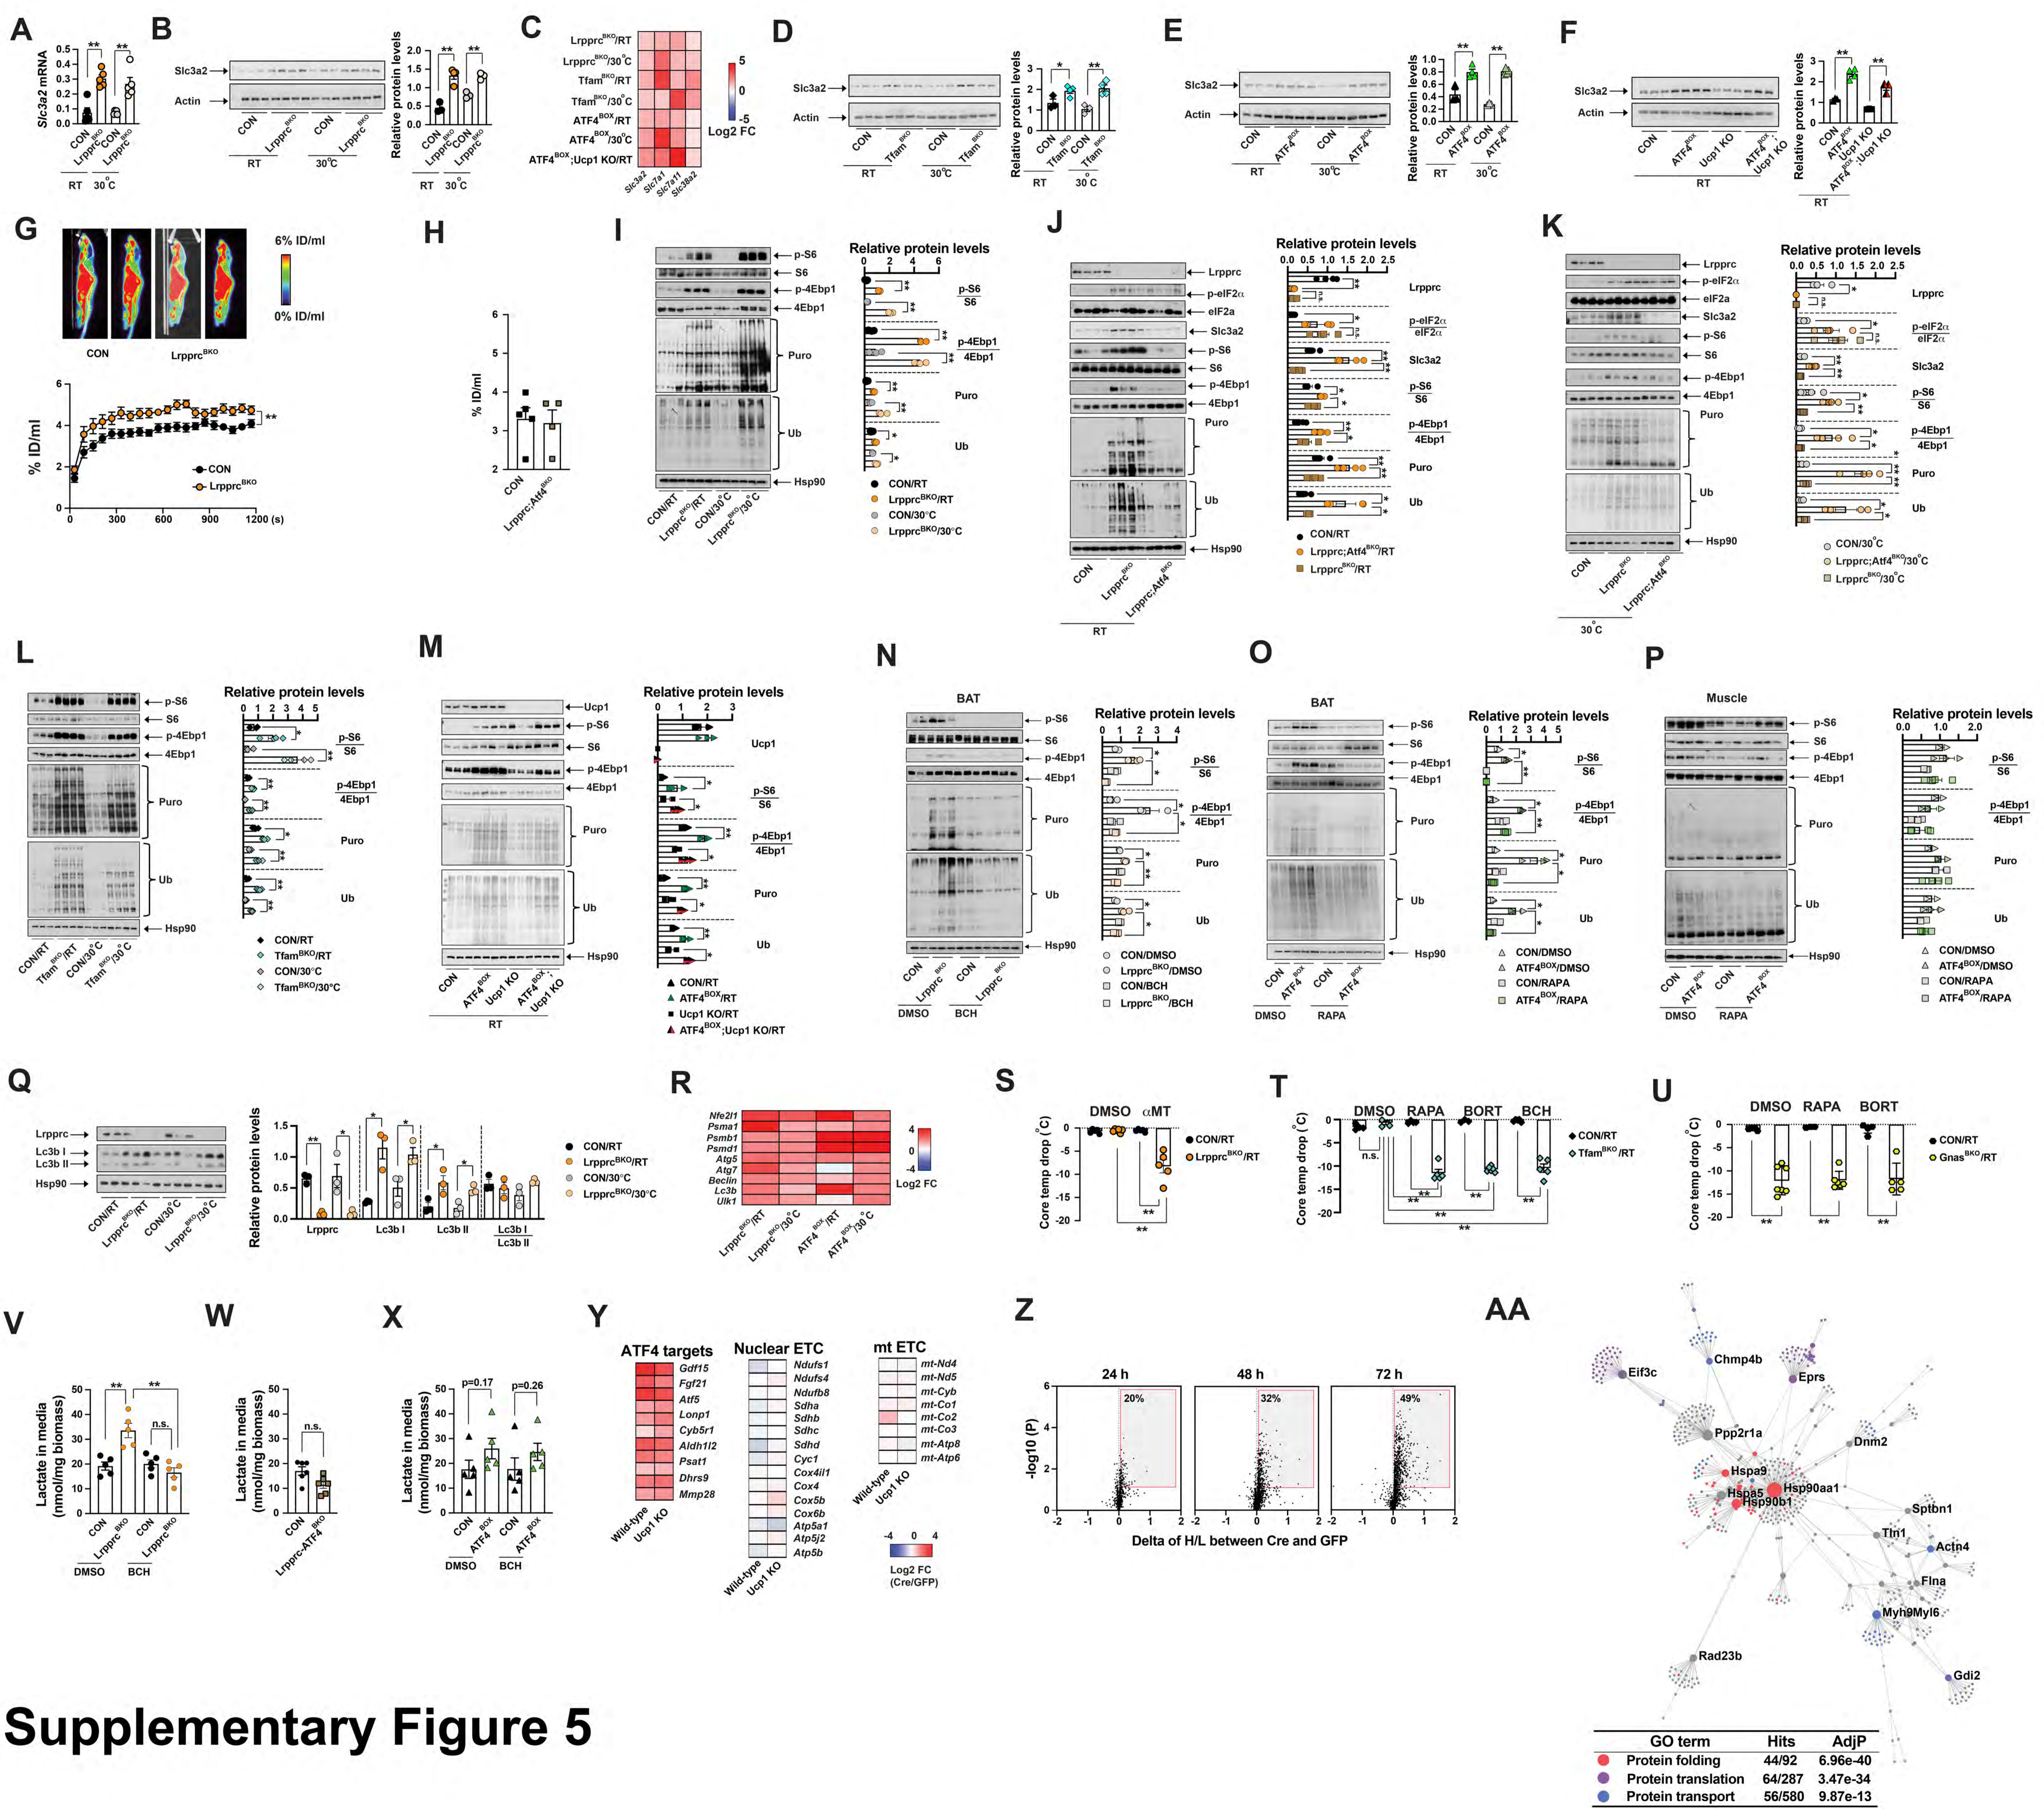

Supplementary Figure 5

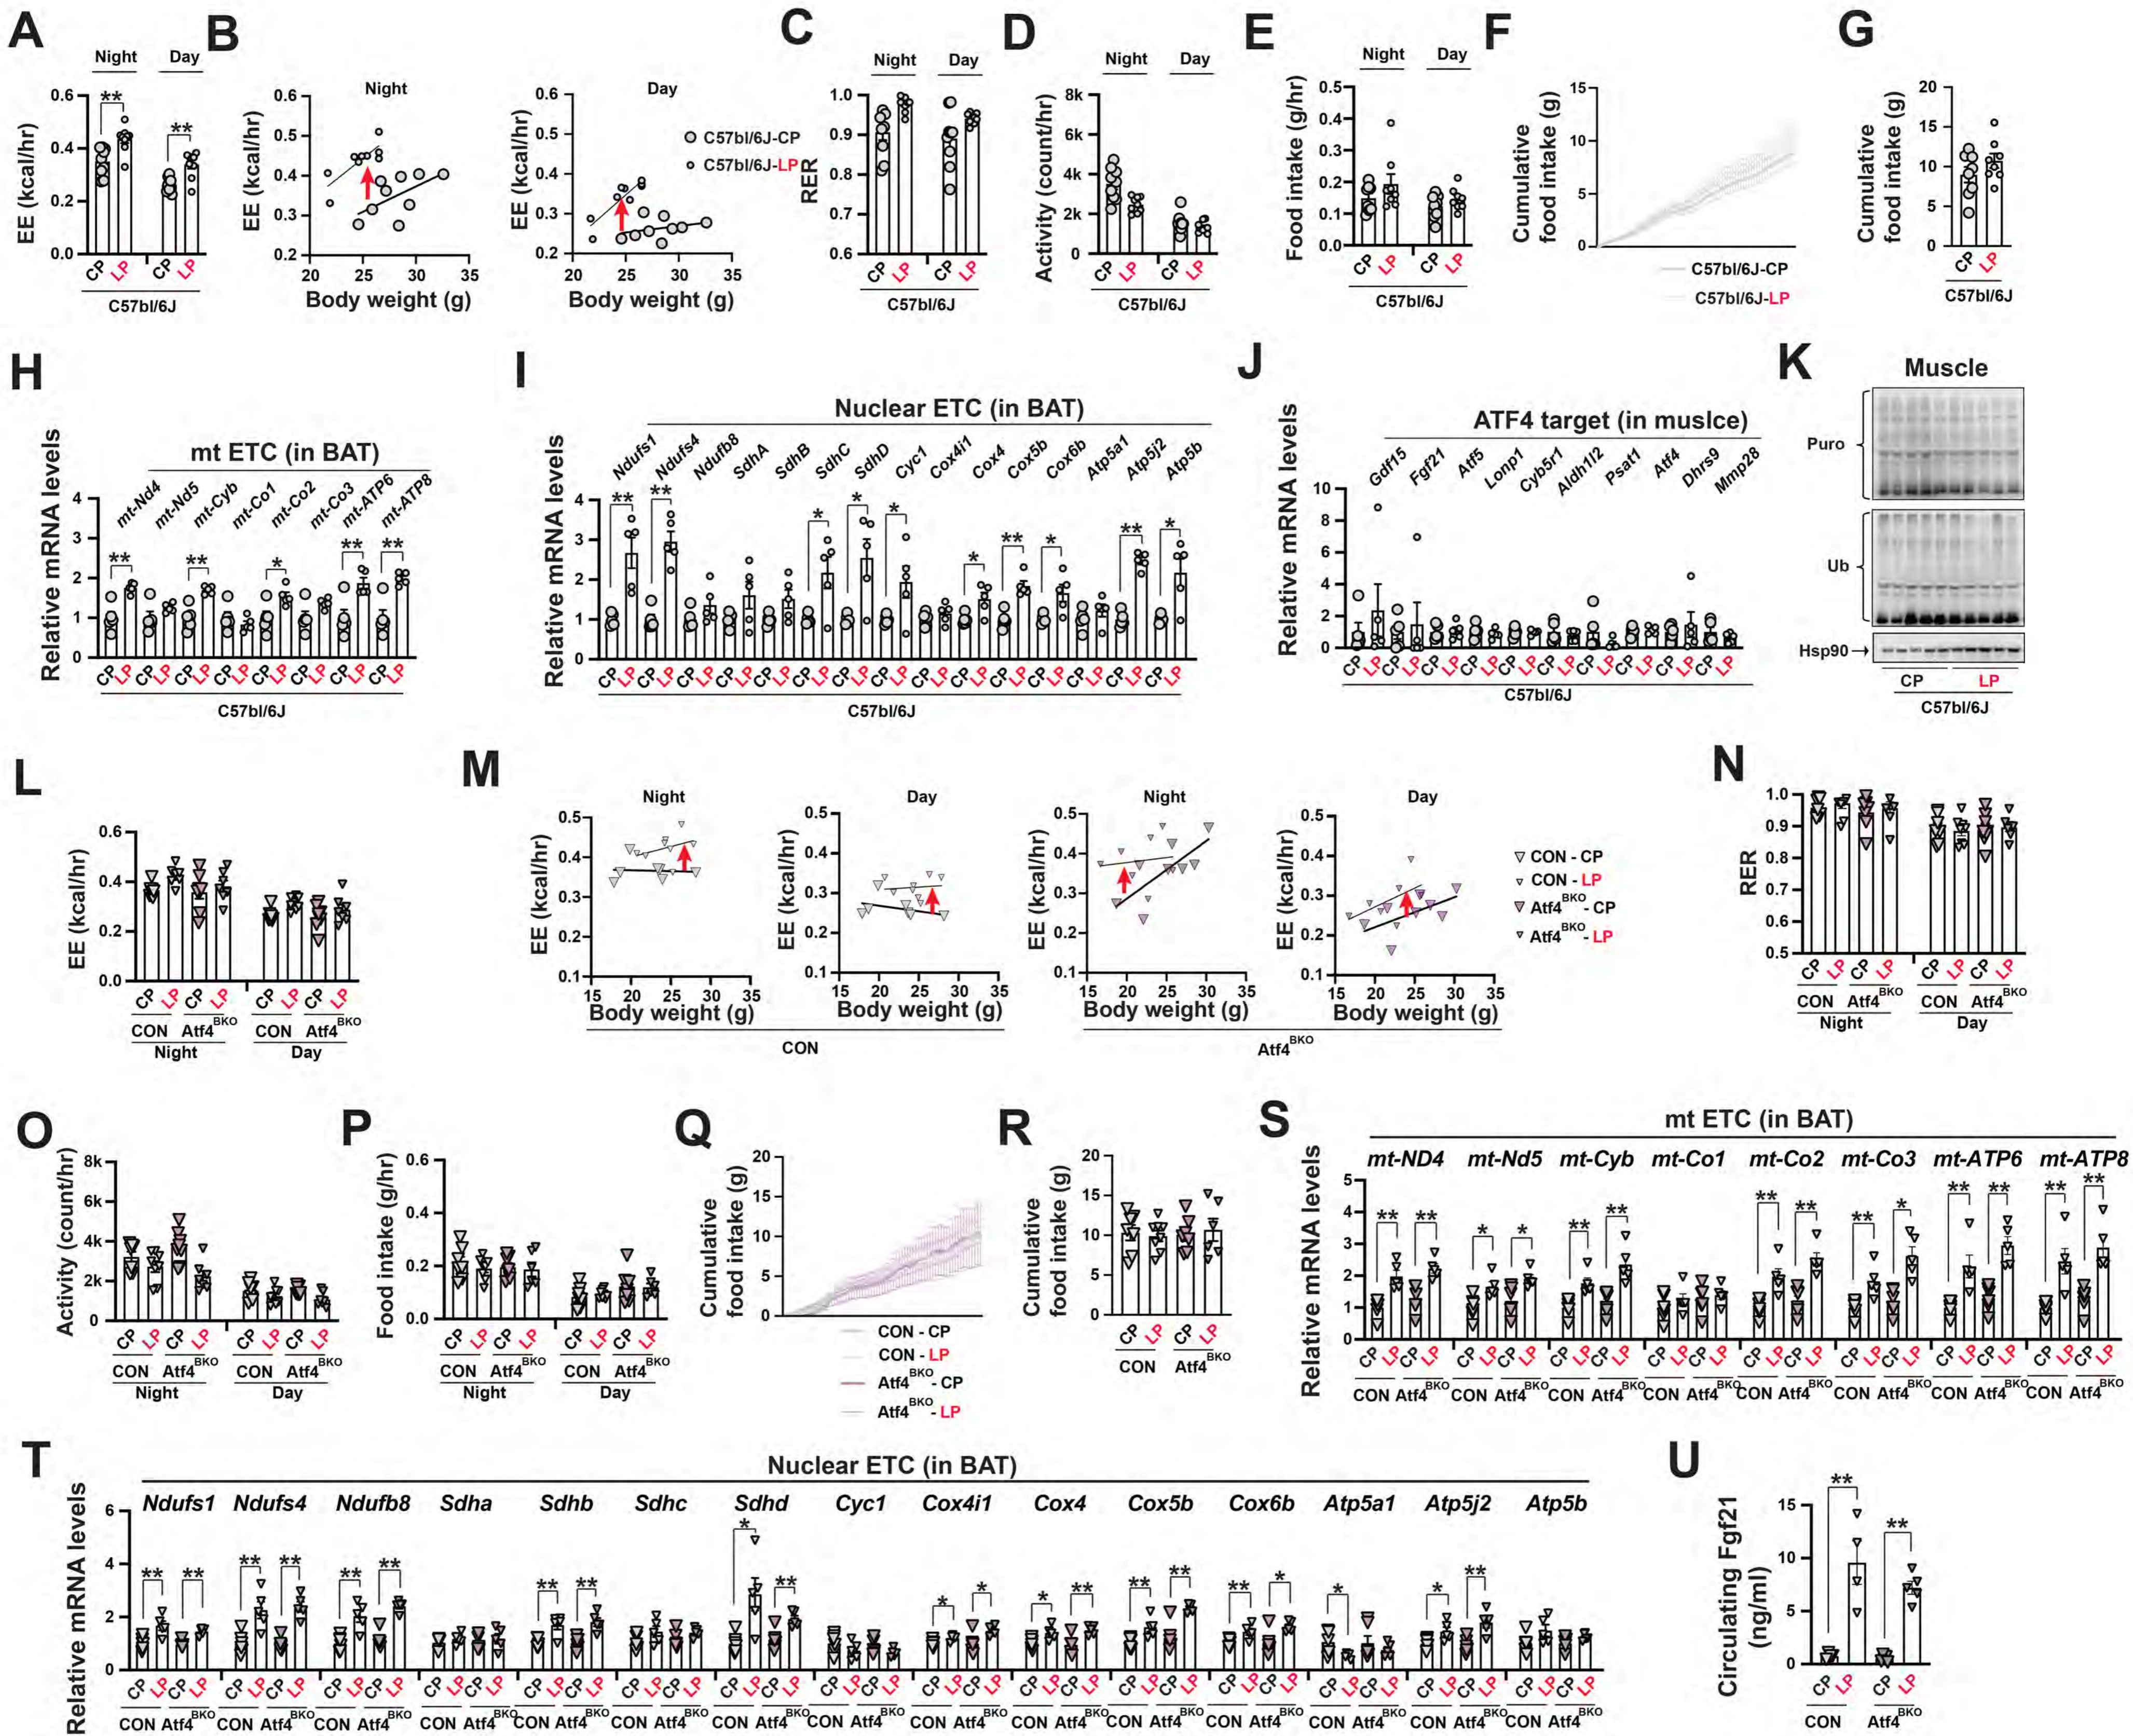

**Supplementary Figure 6**

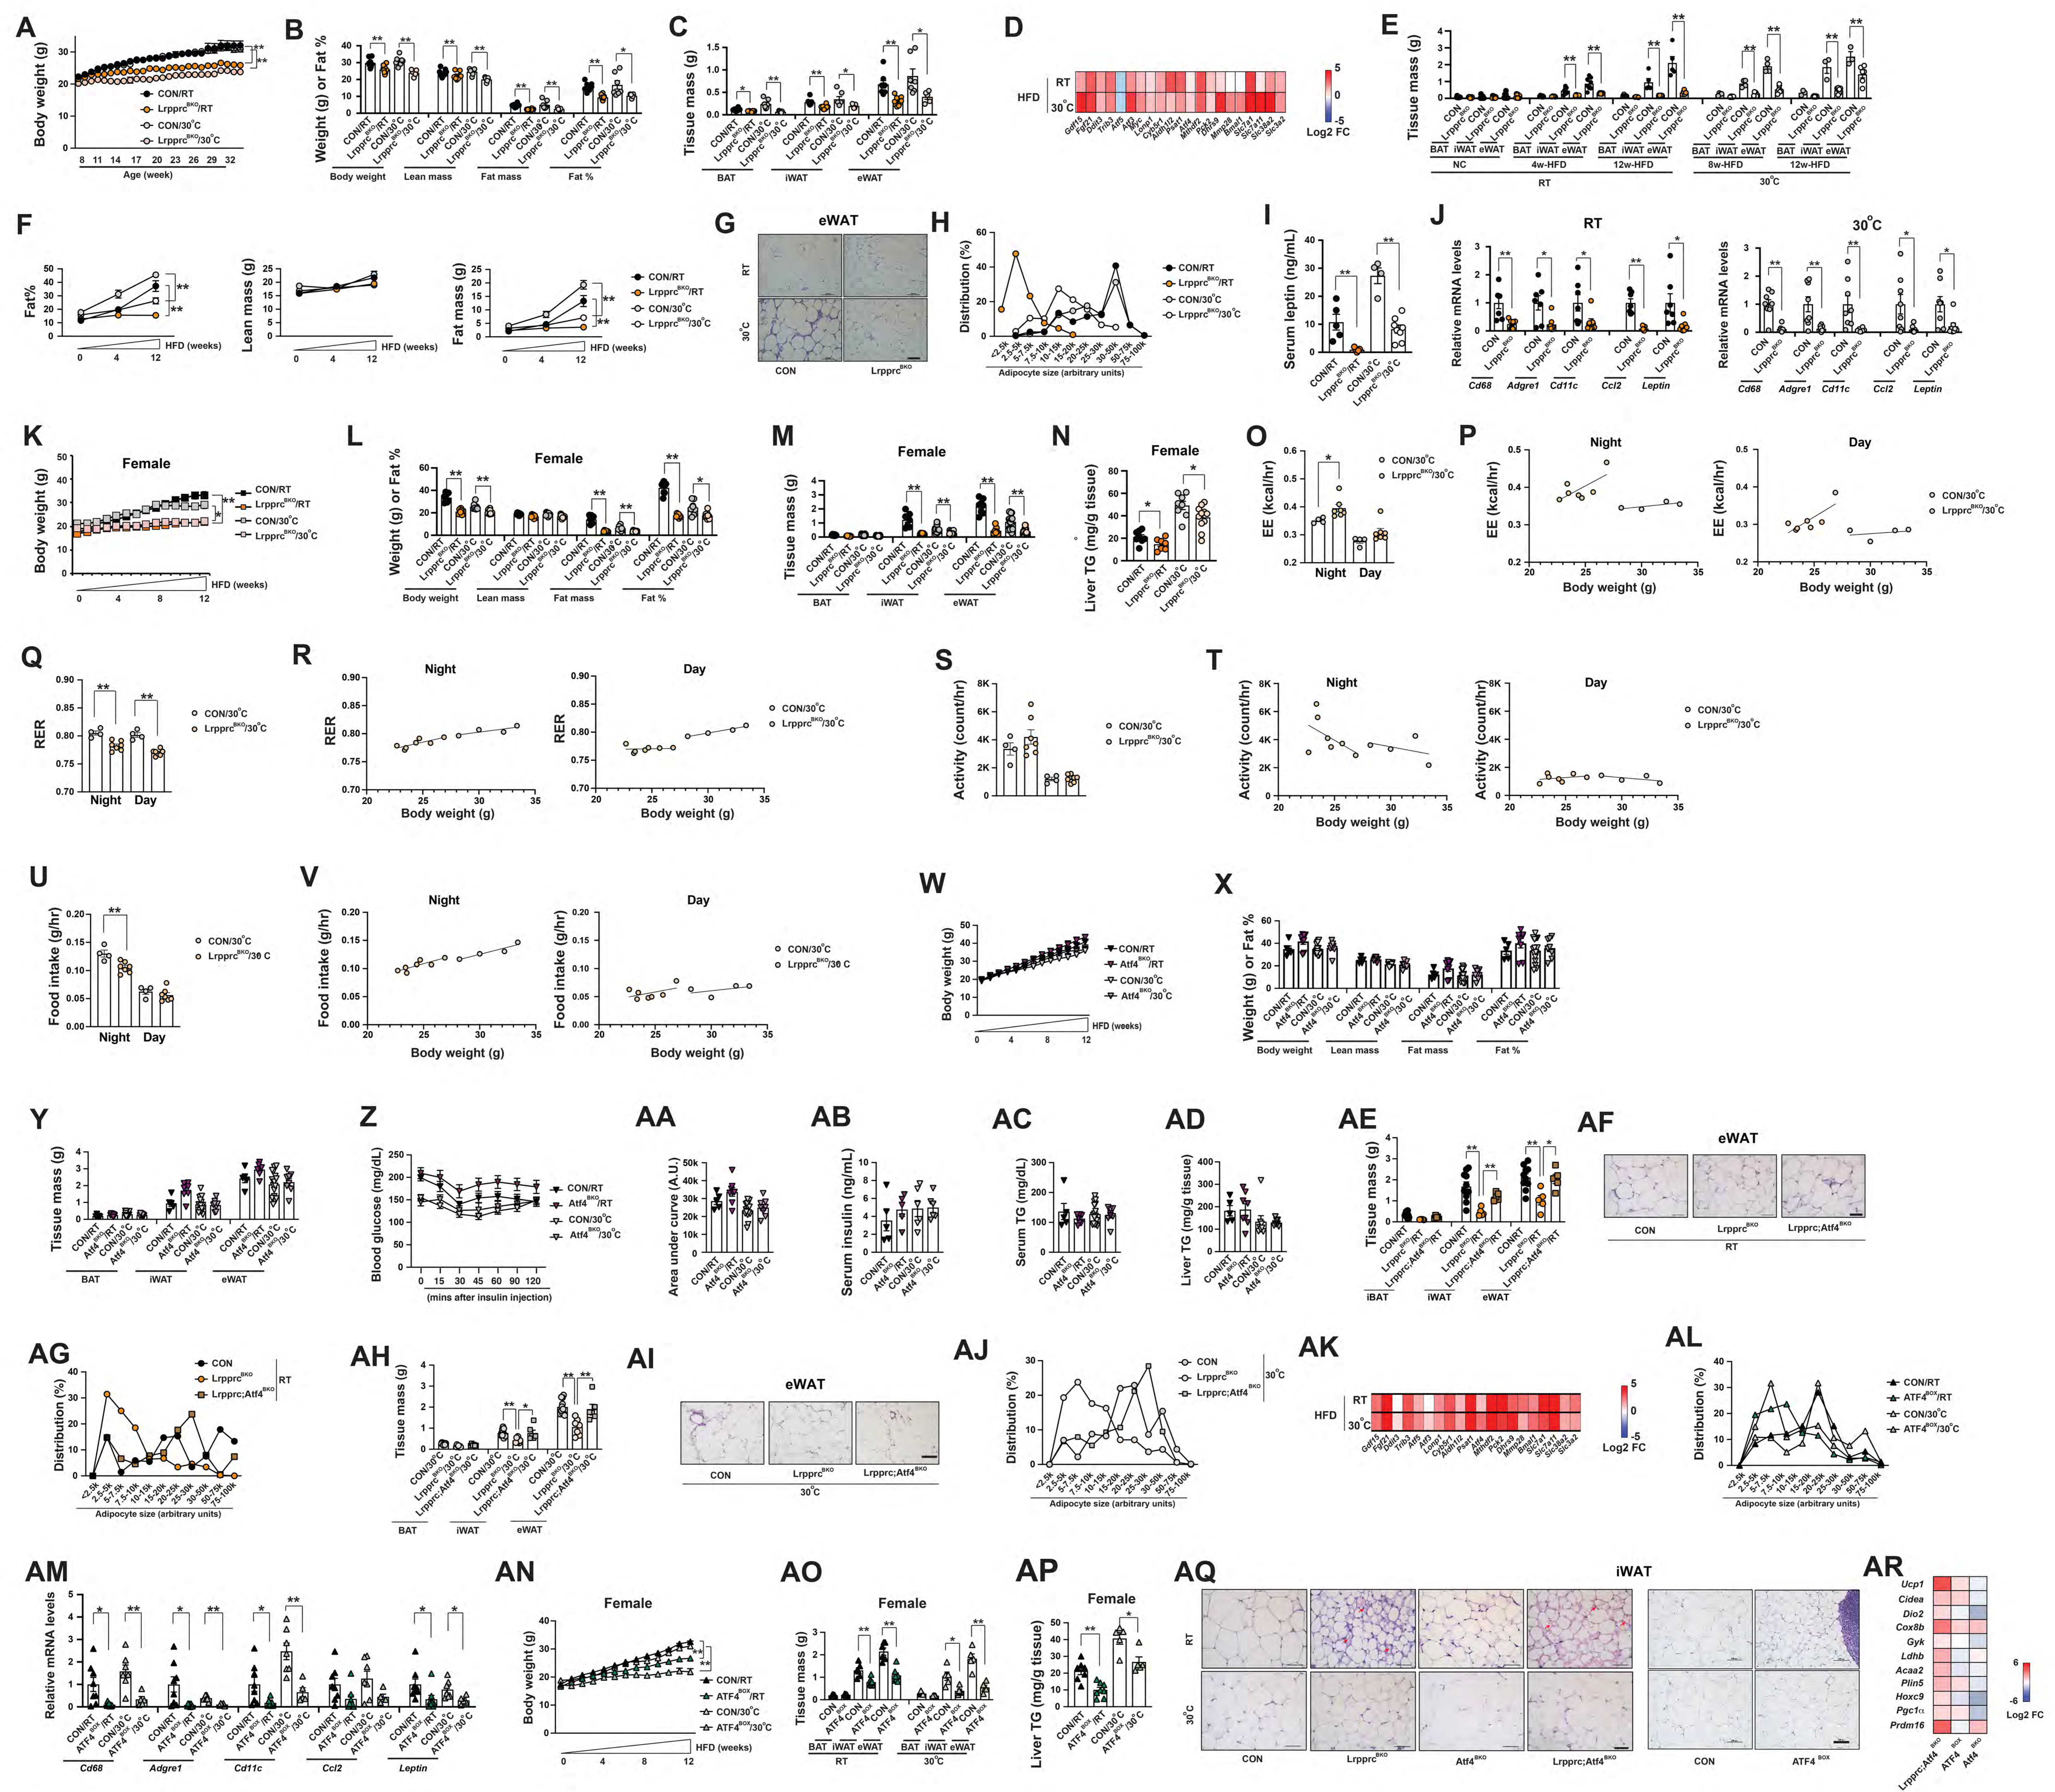

Supplementary Figure 7
